# Supplementary material for: Comparative Multi-Omics Analysis Reveals Systems-Level Molecular Dysfunctions Underlying Salt Sensitivity in Solanum lycopersicum
Source: Research Square preprint supplement (doi:10.21203/rs.3.rs-7277116/v1), 2025-08-25
Supplement: Supplementary file 1 [file fbfa0ceb0e9a5a77a54eccc2.xlsx]

## Sheet: Protein_Domain_Architecture
Gene Family	Species	Accession	Protein Class	Domains and Motifs	No. Domains and Motifs	No. of TM Regions	Disorder Regions and Coverage	No. Cytoplasmic Domain	No. Extracellular Domain
AVP1	Arabidopsis thaliana	NP_173021.1	Vacuolar H+-pyrophosphatase	H+ pyrophosphatase	1	13	0	7	7
AVP1	Solanum lycopersicum	NP_001307479.1	Vacuolar H+-pyrophosphatase	H+ pyrophosphatase	1	13	0	7	7
CHX17	Arabidopsis thaliana	NP_194101.1	Cation/H+ antiporter	Plant cation/H+ antiporter, Na+/H+ exchanger	3	12	0	6	7
CTR1	Arabidopsis thaliana	NP_195993.1	Serine/threonine protein kinase	EDR1/CTR1 peptidase-like, Protein kinase	2	0	4 areas, 15.23%	0	0
CTR1	Solanum lycopersicum	NP_001234454.1	Serine/threonine protein kinase	EDR1/CTR1 peptidase-like, Protein kinase	2	0	2 areas, 5.26%	0	0
CTR1	Solanum lycopersicum	XP_025888482.1	Serine/threonine protein kinase	EDR1/CTR1 peptidase-like, Protein kinase	2	0	2 areas, 5.98%	0	0
GSO1	Arabidopsis thaliana	NP_193747.2	LRR receptor-like kinase	Leucine-rich repeat (LRR), Protein kinase	13	1	0	1	1
GSO1	Solanum lycopersicum	XP_004239381.1	LRR receptor-like kinase	Leucine-rich repeat (LRR), Protein kinase	13	1	0	1	1
HAK5	Arabidopsis thaliana	NP_567404.1	High-affinity potassium transporter	K+ transporter domains	2	12	4 areas, 9.68%	7	6
HAK5	Solanum lycopersicum	NP_001234372.2	High-affinity potassium transporter	K+ transporter domains	2	12	2 areas, 8.65%	7	6
HAK5	Solanum lycopersicum	XP_069147902.1	High-affinity potassium transporter	K+ transporter domains	2	10	2 areas, 9.97%	6	5
HKT1	Arabidopsis thaliana	NP_567354.1	Potassium/sodium transporter	Cation transporter	1	8	0	5	4
HKT1	Solanum lycopersicum	NP_001289833.1	Potassium/sodium transporter	Cation transporter	2	10	0	6	5
MYB74	Arabidopsis thaliana	NP_192419.1	MYB transcription factor	MYB DNA-binding	2	0	0	0	0
NHX1	Arabidopsis thaliana	NP_198067.1	Sodium/H+ exchanger	Na+/H+ exchanger	1	13	0	7	7
NHX1	Solanum lycopersicum	NP_001233885.2	Sodium/H+ exchanger	Na+/H+ exchanger	1	12	2 areas, 8.77%	6	7
NHX1	Solanum lycopersicum	XP_010324159.1	Sodium/H+ exchanger	Na+/H+ exchanger	1	12	2 areas, 8.77%	6	7
NHX1	Solanum lycopersicum	XP_025884695.1	Sodium/H+ exchanger	Na+/H+ exchanger	1	12	2 areas, 8.77%	6	7
NHX2	Arabidopsis thaliana	NP_187154.1	Sodium/H+ exchanger	Na+/H+ exchanger	1	13	0	7	7
SOS1	Arabidopsis thaliana	NP_178307.2	Sodium/H+ antiporter	Na+/H+ exchanger	1	13	4 areas, 6.02%	7	7
SOS1	Solanum lycopersicum	NP_001234698.2	Sodium/H+ antiporter	Na+/H+ exchanger	1	13	3 areas, 11.47%	7	7
SOS2	Arabidopsis thaliana	NP_198391.1	Calcium-dependent protein kinase	NAF domain, Protein kinase	2	1	0	1	1
SOS2	Solanum lycopersicum	NP_001234210.1	Calcium-dependent protein kinase	NAF domain, Protein kinase	2	0	0	0	0
SOS2	Solanum lycopersicum	XP_069147947.1	Calcium-dependent protein kinase	NAF domain, Protein kinase	2	0	0	0	0
SOS3	Arabidopsis thaliana	NP_197815.1	Calcineurin B-like protein	EF-hand domain	2	0	0	0	0
SOS3	Solanum lycopersicum	NP_001234705.1	Calcineurin B-like protein	EF-hand domain	2	0	0	0	0
SOS3	Solanum lycopersicum	XP_025885582.1	Calcineurin B-like protein	EF-hand domain	2	0	0	0	0
SOS3	Solanum lycopersicum	XP_025885583.1	Calcineurin B-like protein	EF-hand domain	2	0	0	0	0
SOS3	Solanum lycopersicum	XP_025885584.1	Calcineurin B-like protein	EF-hand domain	2	0	0	0	0
SOS3	Solanum lycopersicum	XP_069150952.1	Calcineurin B-like protein	EF-hand domain	2	0	0	0	0
SOS3	Solanum lycopersicum	XP_069150953.1	Calcineurin B-like protein	EF-hand domain	2	0	0	0	0
WRKY8	Arabidopsis thaliana	NP_199447.1	WRKY transcription factor	WRKY DNA-binding	1	0	3 areas, 29.75%	0	0

## Sheet: Regulatory_Elements
Sequence ID	TFBS ID	TFBS Name	Posistion	Strand	Similar Score	Binding sequence	TF family	TF ID
gene-ASAT1::NC_090811.1:1242156-1244155(-)	TF_motif_seq_0001	LREBOXIPCCHS1	1333	-	accatAGGTT	(Motif sequence only)
gene-ASAT1::NC_090811.1:1242156-1244155(-)	TF_motif_seq_0003	WINPSTPIIIK	328	-	atttaAGCTT	(Motif sequence only)
gene-ASAT1::NC_090811.1:1242156-1244155(-)	TF_motif_seq_0003	WINPSTPIIIK	587	-	acctaAGCTT	(Motif sequence only)
gene-ASAT1::NC_090811.1:1242156-1244155(-)	TF_motif_seq_0003	WINPSTPIIIK	811	-	tcataTGCTT	(Motif sequence only)
gene-ASAT1::NC_090811.1:1242156-1244155(-)	TF_motif_seq_0003	WINPSTPIIIK	889	+	AAGCCtaatt	(Motif sequence only)
gene-ASAT1::NC_090811.1:1242156-1244155(-)	TF_motif_seq_0003	WINPSTPIIIK	1258	+	AAGGGtattt	(Motif sequence only)
gene-ASAT1::NC_090811.1:1242156-1244155(-)	TF_motif_seq_0004	MARABOX1	235	+	AATAAagaaa	(Motif sequence only)
gene-ASAT1::NC_090811.1:1242156-1244155(-)	TF_motif_seq_0004	MARABOX1	834	-	tctgtTTATT	(Motif sequence only)
gene-ASAT1::NC_090811.1:1242156-1244155(-)	TF_motif_seq_0004	MARABOX1	1423	+	AATAAataca	(Motif sequence only)
gene-ASAT1::NC_090811.1:1242156-1244155(-)	TF_motif_seq_0008	GBOXPC	1268	-	gctgtGTGGT	(Motif sequence only)
gene-ASAT1::NC_090811.1:1242156-1244155(-)	TF_motif_seq_0009	LS7ATPR1	357	-	tccacGATGT	(Motif sequence only)
gene-ASAT1::NC_090811.1:1242156-1244155(-)	TF_motif_seq_0009	LS7ATPR1	1133	-	attatGAAGT	(Motif sequence only)
gene-ASAT1::NC_090811.1:1242156-1244155(-)	TF_motif_seq_0015	CIACADIANLELHC	799	-	gattaATTTG	(Motif sequence only)
gene-ASAT1::NC_090811.1:1242156-1244155(-)	TF_motif_seq_0015	CIACADIANLELHC	1111	-	gataaAATTG	(Motif sequence only)
gene-ASAT1::NC_090811.1:1242156-1244155(-)	TF_motif_seq_0017	GMHDLGMVSPB	1	-	ttattTAATG	(Motif sequence only)
gene-ASAT1::NC_090811.1:1242156-1244155(-)	TF_motif_seq_0017	GMHDLGMVSPB	1030	+	CATTAttgag	(Motif sequence only)
gene-ASAT1::NC_090811.1:1242156-1244155(-)	TF_motif_seq_0017	GMHDLGMVSPB	1535	-	ttcatTAATG	(Motif sequence only)
gene-ASAT1::NC_090811.1:1242156-1244155(-)	TF_motif_seq_0026	B2GMAUX28	695	-	tgcatACAAG	(Motif sequence only)
gene-ASAT1::NC_090811.1:1242156-1244155(-)	TF_motif_seq_0027	CARGCW8GAT	164	+	CTTTAttttg	(Motif sequence only)
gene-ASAT1::NC_090811.1:1242156-1244155(-)	TF_motif_seq_0027	CARGCW8GAT	164	-	ctttaTTTTG	(Motif sequence only)
gene-ASAT1::NC_090811.1:1242156-1244155(-)	TF_motif_seq_0027	CARGCW8GAT	1017	+	CTTTAttttg	(Motif sequence only)
gene-ASAT1::NC_090811.1:1242156-1244155(-)	TF_motif_seq_0027	CARGCW8GAT	1017	-	ctttaTTTTG	(Motif sequence only)
gene-ASAT1::NC_090811.1:1242156-1244155(-)	TF_motif_seq_0034	ABRE3HVA22	1945	-	taaaaGTGGC	(Motif sequence only)
gene-ASAT1::NC_090811.1:1242156-1244155(-)	TF_motif_seq_0038	ABREDISTBBNNAPA	1945	-	taaaaGTGGC	(Motif sequence only)
gene-ASAT1::NC_090811.1:1242156-1244155(-)	TF_motif_seq_0040	BBOXSITE1STPAT	613	+	GCTAAacaag	(Motif sequence only)
gene-ASAT1::NC_090811.1:1242156-1244155(-)	TF_motif_seq_0040	BBOXSITE1STPAT	1058	+	GCTAAttaat	(Motif sequence only)
gene-ASAT1::NC_090811.1:1242156-1244155(-)	TF_motif_seq_0049	LREBOXIIPCCHS1	357	+	TCCACgatgt	(Motif sequence only)
gene-ASAT1::NC_090811.1:1242156-1244155(-)	TF_motif_seq_0049	LREBOXIIPCCHS1	1823	+	TCCACctagt	(Motif sequence only)
gene-ASAT1::NC_090811.1:1242156-1244155(-)	TF_motif_seq_0050	GBOXSORBCS1	357	+	TCCACgatgt	(Motif sequence only)
gene-ASAT1::NC_090811.1:1242156-1244155(-)	TF_motif_seq_0050	GBOXSORBCS1	1823	+	TCCACctagt	(Motif sequence only)
gene-ASAT1::NC_090811.1:1242156-1244155(-)	TF_motif_seq_0052	LS5ATPR1	1410	+	TCTACcctac	(Motif sequence only)
gene-ASAT1::NC_090811.1:1242156-1244155(-)	TF_motif_seq_0052	LS5ATPR1	1776	+	TCTACgggat	(Motif sequence only)
gene-ASAT1::NC_090811.1:1242156-1244155(-)	TF_motif_seq_0053	SORLREP5AT	706	+	TTGCAttgtt	(Motif sequence only)
gene-ASAT1::NC_090811.1:1242156-1244155(-)	TF_motif_seq_0054	MARTBOX	851	-	AAAAAaaaaa	(Motif sequence only)
gene-ASAT1::NC_090811.1:1242156-1244155(-)	TF_motif_seq_0055	LBOXLERBCS	797	-	ttgattAATTT	(Motif sequence only)
gene-ASAT1::NC_090811.1:1242156-1244155(-)	TF_motif_seq_0055	LBOXLERBCS	1341	-	ttatttAATTT	(Motif sequence only)
gene-ASAT1::NC_090811.1:1242156-1244155(-)	TF_motif_seq_0055	LBOXLERBCS	1512	+	AAATTaacgaa	(Motif sequence only)
gene-ASAT1::NC_090811.1:1242156-1244155(-)	TF_motif_seq_0060	UPRE1AT	1614	-	tatcgaCCAAT	(Motif sequence only)
gene-ASAT1::NC_090811.1:1242156-1244155(-)	TF_motif_seq_0064	DR5GMGH3	408	+	CCTTTtatctg	(Motif sequence only)
gene-ASAT1::NC_090811.1:1242156-1244155(-)	TF_motif_seq_0064	DR5GMGH3	1386	+	CCTTTcctctt	(Motif sequence only)
gene-ASAT1::NC_090811.1:1242156-1244155(-)	TF_motif_seq_0064	DR5GMGH3	1635	-	gaacaaAAAGG	(Motif sequence only)
gene-ASAT1::NC_090811.1:1242156-1244155(-)	TF_motif_seq_0071	RNFG1OS	964	-	cttagaTGATC	(Motif sequence only)
gene-ASAT1::NC_090811.1:1242156-1244155(-)	TF_motif_seq_0083	D3GMAUX28	167	+	TATTTtgttag	(Motif sequence only)
gene-ASAT1::NC_090811.1:1242156-1244155(-)	TF_motif_seq_0083	D3GMAUX28	424	+	TATTTcactaa	(Motif sequence only)
gene-ASAT1::NC_090811.1:1242156-1244155(-)	TF_motif_seq_0083	D3GMAUX28	427	-	ttcactAAATA	(Motif sequence only)
gene-ASAT1::NC_090811.1:1242156-1244155(-)	TF_motif_seq_0083	D3GMAUX28	875	-	taaaaaAAATA	(Motif sequence only)
gene-ASAT1::NC_090811.1:1242156-1244155(-)	TF_motif_seq_0083	D3GMAUX28	927	-	ttatgaAAATA	(Motif sequence only)
gene-ASAT1::NC_090811.1:1242156-1244155(-)	TF_motif_seq_0083	D3GMAUX28	1020	+	TATTTtgttac	(Motif sequence only)
gene-ASAT1::NC_090811.1:1242156-1244155(-)	TF_motif_seq_0083	D3GMAUX28	1263	+	TATTTgctgtg	(Motif sequence only)
gene-ASAT1::NC_090811.1:1242156-1244155(-)	TF_motif_seq_0083	D3GMAUX28	1420	-	ttaaatAAATA	(Motif sequence only)
gene-ASAT1::NC_090811.1:1242156-1244155(-)	TF_motif_seq_0083	D3GMAUX28	1469	+	TATTTgctatc	(Motif sequence only)
gene-ASAT1::NC_090811.1:1242156-1244155(-)	TF_motif_seq_0083	D3GMAUX28	1502	+	TATTTacatca	(Motif sequence only)
gene-ASAT1::NC_090811.1:1242156-1244155(-)	TF_motif_seq_0083	D3GMAUX28	1979	+	TATTTcattca	(Motif sequence only)
gene-ASAT1::NC_090811.1:1242156-1244155(-)	TF_motif_seq_0089	ABASEED1	63	+	TGTTActagct	(Motif sequence only)
gene-ASAT1::NC_090811.1:1242156-1244155(-)	TF_motif_seq_0090	MARARS	410	+	tTTTATctgtt	(Motif sequence only)
gene-ASAT1::NC_090811.1:1242156-1244155(-)	TF_motif_seq_0090	MARARS	819	+	tTTTATatttt	(Motif sequence only)
gene-ASAT1::NC_090811.1:1242156-1244155(-)	TF_motif_seq_0098	RBCSBOX3PS	972	+	ATCATtttagat	(Motif sequence only)
gene-ASAT1::NC_090811.1:1242156-1244155(-)	TF_motif_seq_0098	RBCSBOX3PS	1036	-	tgagataATGAT	(Motif sequence only)
gene-ASAT1::NC_090811.1:1242156-1244155(-)	TF_motif_seq_0100	D2GMAUX28	435	-	atatgtaTAAAT	(Motif sequence only)
gene-ASAT1::NC_090811.1:1242156-1244155(-)	TF_motif_seq_0100	D2GMAUX28	1279	+	ATTTAtaaaaaa	(Motif sequence only)
gene-ASAT1::NC_090811.1:1242156-1244155(-)	TF_motif_seq_0100	D2GMAUX28	1418	-	acttaaaTAAAT	(Motif sequence only)
gene-ASAT1::NC_090811.1:1242156-1244155(-)	TF_motif_seq_0100	D2GMAUX28	1579	+	ATTTAtaacaat	(Motif sequence only)
gene-ASAT1::NC_090811.1:1242156-1244155(-)	TF_motif_seq_0101	HSRENTHSR203J	293	-	aagaacaTTTTG	(Motif sequence only)
gene-ASAT1::NC_090811.1:1242156-1244155(-)	TF_motif_seq_0101	HSRENTHSR203J	652	-	tagtgaaTTTTG	(Motif sequence only)
gene-ASAT1::NC_090811.1:1242156-1244155(-)	TF_motif_seq_0102	RSEPVGRP1	126	-	acttgcaAGTTG	(Motif sequence only)
gene-ASAT1::NC_090811.1:1242156-1244155(-)	TF_motif_seq_0102	RSEPVGRP1	237	-	taaagaaAGTTG	(Motif sequence only)
gene-ASAT1::NC_090811.1:1242156-1244155(-)	TF_motif_seq_0109	MRNASTA1CRPSBD	188	+	CTCTTggtctta	(Motif sequence only)
gene-ASAT1::NC_090811.1:1242156-1244155(-)	TF_motif_seq_0109	MRNASTA1CRPSBD	267	+	CTCTTtagttta	(Motif sequence only)
gene-ASAT1::NC_090811.1:1242156-1244155(-)	TF_motif_seq_0110	DE1PSPRA2	520	-	tcttgaaAATCC	(Motif sequence only)
gene-ASAT1::NC_090811.1:1242156-1244155(-)	TF_motif_seq_0128	SITE3SORPS1	548	-	tttgctaccTAACT	(Motif sequence only)
gene-ASAT1::NC_090811.1:1242156-1244155(-)	TF_motif_seq_0135	HSE	312	-	ctaaaattaTCGAG	(Motif sequence only)
gene-ASAT1::NC_090811.1:1242156-1244155(-)	TF_motif_seq_0137	RBCSBOX2PS	575	-	gtgataaacCACAC	(Motif sequence only)
gene-ASAT1::NC_090811.1:1242156-1244155(-)	TF_motif_seq_0137	RBCSBOX2PS	1667	-	gaaatcatcCACAC	(Motif sequence only)
gene-ASAT1::NC_090811.1:1242156-1244155(-)	TF_motif_seq_0143	AS1LIKECSHPRA	1268	-	gctgtgtggtCATTT	(Motif sequence only)
gene-ASAT1::NC_090811.1:1242156-1244155(-)	TF_motif_seq_0148	HBOXCONSENSUSPVCHS	88	+	TCTACctattgtatt	(Motif sequence only)
gene-ASAT1::NC_090811.1:1242156-1244155(-)	TF_motif_seq_0148	HBOXCONSENSUSPVCHS	551	+	GCTACctaacttttt	(Motif sequence only)
gene-ASAT1::NC_090811.1:1242156-1244155(-)	TF_motif_seq_0148	HBOXCONSENSUSPVCHS	555	+	CCTAActttttcacc	(Motif sequence only)
gene-ASAT1::NC_090811.1:1242156-1244155(-)	TF_motif_seq_0148	HBOXCONSENSUSPVCHS	588	+	CCTAAgcttctttct	(Motif sequence only)
gene-ASAT1::NC_090811.1:1242156-1244155(-)	TF_motif_seq_0148	HBOXCONSENSUSPVCHS	617	-	aacaagactgGTAGT	(Motif sequence only)
gene-ASAT1::NC_090811.1:1242156-1244155(-)	TF_motif_seq_0148	HBOXCONSENSUSPVCHS	653	-	agtgaattttGTAGA	(Motif sequence only)
gene-ASAT1::NC_090811.1:1242156-1244155(-)	TF_motif_seq_0148	HBOXCONSENSUSPVCHS	1330	+	CATACcataggttat	(Motif sequence only)
gene-ASAT1::NC_090811.1:1242156-1244155(-)	TF_motif_seq_0148	HBOXCONSENSUSPVCHS	1415	+	CCTACttaaataaat	(Motif sequence only)
gene-ASAT1::NC_090811.1:1242156-1244155(-)	TF_motif_seq_0148	HBOXCONSENSUSPVCHS	1860	+	CCTAGcgcgcttttt	(Motif sequence only)
gene-ASAT1::NC_090811.1:1242156-1244155(-)	TF_motif_seq_0150	GLUTEBOX2OSGT3	1404	+	CTTTTatctacccta	(Motif sequence only)
gene-ASAT1::NC_090811.1:1242156-1244155(-)	TF_motif_seq_0154	LREBOX2PSRBCS3	1667	-	gaaatcatccACACA	(Motif sequence only)
gene-ASAT1::NC_090811.1:1242156-1244155(-)	TF_motif_seq_0155	SB3NPABC1	927	+	TTATGaaaataattt	(Motif sequence only)
gene-ASAT1::NC_090811.1:1242156-1244155(-)	TF_motif_seq_0159	SB1NPABC1	485	+	CACTAaaacaaaatcc	(Motif sequence only)
gene-ASAT1::NC_090811.1:1242156-1244155(-)	TF_motif_seq_0167	C1GMAUX28	902	+	TGAAAacaattagttg	(Motif sequence only)
gene-ASAT1::NC_090811.1:1242156-1244155(-)	TF_motif_seq_0181	CARG1ATAP3	837	+	GTTTAttcaaaaagaaaa	(Motif sequence only)
gene-ASAT1::NC_090811.1:1242156-1244155(-)	TF_motif_seq_0182	AGL2ATCONSENSUS	1613	-	atatcgaccAATGGataa	(Motif sequence only)
gene-ASAT1::NC_090811.1:1242156-1244155(-)	TF_motif_seq_0186	ASF1NTPARA	542	-	aattcatttgctaCCTAA	(Motif sequence only)
gene-ASAT1::NC_090811.1:1242156-1244155(-)	TF_motif_seq_0186	ASF1NTPARA	905	-	aaacaattagttgAGTAA	(Motif sequence only)
gene-ASAT1::NC_090811.1:1242156-1244155(-)	TF_motif_seq_0186	ASF1NTPARA	1466	-	agttatttgctatCATAA	(Motif sequence only)
gene-ASAT1::NC_090811.1:1242156-1244155(-)	TF_motif_seq_0188	UPRMOTIFIIAT	344	+	ctgacaaagcagatCCACG	(Motif sequence only)
gene-ASAT1::NC_090811.1:1242156-1244155(-)	TF_motif_seq_0191	C2GMAUX28	7	-	aatgttgtattgttgTTATT	(Motif sequence only)
gene-ASAT1::NC_090811.1:1242156-1244155(-)	TF_motif_seq_0191	C2GMAUX28	305	+	AATAAtactaaaattatcga	(Motif sequence only)
gene-ASAT1::NC_090811.1:1242156-1244155(-)	TF_motif_seq_0198	OCSGMHSP26A	1534	-	tttcattaatgcatgCATCA	(Motif sequence only)
gene-ASAT1::NC_090811.1:1242156-1244155(-)	TF_motif_seq_0209	23BPUASNSCYCB1	218	-	ttttttcacttcgcttaaATAAA	(Motif sequence only)
gene-ASAT1::NC_090811.1:1242156-1244155(-)	TF_motif_seq_0209	23BPUASNSCYCB1	336	+	TTTATatactgacaaagcagatc	(Motif sequence only)
gene-ASAT1::NC_090811.1:1242156-1244155(-)	TF_motif_seq_0209	23BPUASNSCYCB1	1127	-	aatcttattatgaagtcgATAAA	(Motif sequence only)
gene-ASAT1::NC_090811.1:1242156-1244155(-)	TF_motif_seq_0209	23BPUASNSCYCB1	1406	+	TTTATctaccctacttaaataaa	(Motif sequence only)
gene-ASAT1::NC_090811.1:1242156-1244155(-)	TF_motif_seq_0215	PRECONSCRHSP70A	977	-	tttagatattaattcctttATCGC	(Motif sequence only)
gene-ASAT1::NC_090811.1:1242156-1244155(-)	TF_motif_seq_0215	PRECONSCRHSP70A	1471	-	tttgctatcataagaatttATCGG	(Motif sequence only)
gene-ASAT1::NC_090811.1:1242156-1244155(-)	TF_motif_seq_0232	OCETYPEIIINTHISTONE	355	+	GATCCacgatgtaagctatacgttcaacgg	(Motif sequence only)
gene-ASAT1::NC_090811.1:1242156-1244155(-)	TF_motif_seq_0233	ATRICHPSPETE	882	+	AATATataagcctaattgaatgaaaacaatt	(Motif sequence only)
gene-ASAT1::NC_090811.1:1242156-1244155(-)	TF_motif_seq_0238	DOFCOREZM	83	-	TCTTT	(Motif sequence only)
gene-ASAT1::NC_090811.1:1242156-1244155(-)	TF_motif_seq_0238	DOFCOREZM	163	-	ACTTT	(Motif sequence only)
gene-ASAT1::NC_090811.1:1242156-1244155(-)	TF_motif_seq_0238	DOFCOREZM	213	-	ACTTT	(Motif sequence only)
gene-ASAT1::NC_090811.1:1242156-1244155(-)	TF_motif_seq_0238	DOFCOREZM	238	+	AAAGA	(Motif sequence only)
gene-ASAT1::NC_090811.1:1242156-1244155(-)	TF_motif_seq_0238	DOFCOREZM	242	+	AAAGT	(Motif sequence only)
gene-ASAT1::NC_090811.1:1242156-1244155(-)	TF_motif_seq_0238	DOFCOREZM	268	-	TCTTT	(Motif sequence only)
gene-ASAT1::NC_090811.1:1242156-1244155(-)	TF_motif_seq_0238	DOFCOREZM	292	+	AAAGA	(Motif sequence only)
gene-ASAT1::NC_090811.1:1242156-1244155(-)	TF_motif_seq_0238	DOFCOREZM	334	-	GCTTT	(Motif sequence only)
gene-ASAT1::NC_090811.1:1242156-1244155(-)	TF_motif_seq_0238	DOFCOREZM	349	+	AAAGC	(Motif sequence only)
gene-ASAT1::NC_090811.1:1242156-1244155(-)	TF_motif_seq_0238	DOFCOREZM	394	-	GCTTT	(Motif sequence only)
gene-ASAT1::NC_090811.1:1242156-1244155(-)	TF_motif_seq_0238	DOFCOREZM	408	-	CCTTT	(Motif sequence only)
gene-ASAT1::NC_090811.1:1242156-1244155(-)	TF_motif_seq_0238	DOFCOREZM	510	+	AAAGT	(Motif sequence only)
gene-ASAT1::NC_090811.1:1242156-1244155(-)	TF_motif_seq_0238	DOFCOREZM	559	-	ACTTT	(Motif sequence only)
gene-ASAT1::NC_090811.1:1242156-1244155(-)	TF_motif_seq_0238	DOFCOREZM	596	-	TCTTT	(Motif sequence only)
gene-ASAT1::NC_090811.1:1242156-1244155(-)	TF_motif_seq_0238	DOFCOREZM	610	+	AAAGC	(Motif sequence only)
gene-ASAT1::NC_090811.1:1242156-1244155(-)	TF_motif_seq_0238	DOFCOREZM	728	+	AAAGA	(Motif sequence only)
gene-ASAT1::NC_090811.1:1242156-1244155(-)	TF_motif_seq_0238	DOFCOREZM	817	-	GCTTT	(Motif sequence only)
gene-ASAT1::NC_090811.1:1242156-1244155(-)	TF_motif_seq_0238	DOFCOREZM	847	+	AAAGA	(Motif sequence only)
gene-ASAT1::NC_090811.1:1242156-1244155(-)	TF_motif_seq_0238	DOFCOREZM	956	-	TCTTT	(Motif sequence only)
gene-ASAT1::NC_090811.1:1242156-1244155(-)	TF_motif_seq_0238	DOFCOREZM	991	-	CCTTT	(Motif sequence only)
gene-ASAT1::NC_090811.1:1242156-1244155(-)	TF_motif_seq_0238	DOFCOREZM	1016	-	TCTTT	(Motif sequence only)
gene-ASAT1::NC_090811.1:1242156-1244155(-)	TF_motif_seq_0238	DOFCOREZM	1097	+	AAAGA	(Motif sequence only)
gene-ASAT1::NC_090811.1:1242156-1244155(-)	TF_motif_seq_0238	DOFCOREZM	1156	-	GCTTT	(Motif sequence only)
gene-ASAT1::NC_090811.1:1242156-1244155(-)	TF_motif_seq_0238	DOFCOREZM	1200	+	AAAGA	(Motif sequence only)
gene-ASAT1::NC_090811.1:1242156-1244155(-)	TF_motif_seq_0238	DOFCOREZM	1257	+	AAAGG	(Motif sequence only)
gene-ASAT1::NC_090811.1:1242156-1244155(-)	TF_motif_seq_0238	DOFCOREZM	1289	+	AAAGA	(Motif sequence only)
gene-ASAT1::NC_090811.1:1242156-1244155(-)	TF_motif_seq_0238	DOFCOREZM	1314	-	TCTTT	(Motif sequence only)
gene-ASAT1::NC_090811.1:1242156-1244155(-)	TF_motif_seq_0238	DOFCOREZM	1386	-	CCTTT	(Motif sequence only)
gene-ASAT1::NC_090811.1:1242156-1244155(-)	TF_motif_seq_0238	DOFCOREZM	1403	-	TCTTT	(Motif sequence only)
gene-ASAT1::NC_090811.1:1242156-1244155(-)	TF_motif_seq_0238	DOFCOREZM	1440	-	GCTTT	(Motif sequence only)
gene-ASAT1::NC_090811.1:1242156-1244155(-)	TF_motif_seq_0238	DOFCOREZM	1461	+	AAAGA	(Motif sequence only)
gene-ASAT1::NC_090811.1:1242156-1244155(-)	TF_motif_seq_0238	DOFCOREZM	1632	+	AAAGA	(Motif sequence only)
gene-ASAT1::NC_090811.1:1242156-1244155(-)	TF_motif_seq_0238	DOFCOREZM	1641	+	AAAGG	(Motif sequence only)
gene-ASAT1::NC_090811.1:1242156-1244155(-)	TF_motif_seq_0238	DOFCOREZM	1646	-	ACTTT	(Motif sequence only)
gene-ASAT1::NC_090811.1:1242156-1244155(-)	TF_motif_seq_0238	DOFCOREZM	1700	-	GCTTT	(Motif sequence only)
gene-ASAT1::NC_090811.1:1242156-1244155(-)	TF_motif_seq_0238	DOFCOREZM	1868	-	GCTTT	(Motif sequence only)
gene-ASAT1::NC_090811.1:1242156-1244155(-)	TF_motif_seq_0238	DOFCOREZM	1947	+	AAAGT	(Motif sequence only)
gene-ASAT1::NC_090811.1:1242156-1244155(-)	TF_motif_seq_0242	CAATBOX1	14	-	TATTG	(Motif sequence only)
gene-ASAT1::NC_090811.1:1242156-1244155(-)	TF_motif_seq_0242	CAATBOX1	57	+	CAATA	(Motif sequence only)
gene-ASAT1::NC_090811.1:1242156-1244155(-)	TF_motif_seq_0242	CAATBOX1	78	+	CAATG	(Motif sequence only)
gene-ASAT1::NC_090811.1:1242156-1244155(-)	TF_motif_seq_0242	CAATBOX1	94	-	TATTG	(Motif sequence only)
gene-ASAT1::NC_090811.1:1242156-1244155(-)	TF_motif_seq_0242	CAATBOX1	389	+	CAATA	(Motif sequence only)
gene-ASAT1::NC_090811.1:1242156-1244155(-)	TF_motif_seq_0242	CAATBOX1	541	+	CAATT	(Motif sequence only)
gene-ASAT1::NC_090811.1:1242156-1244155(-)	TF_motif_seq_0242	CAATBOX1	692	+	CAATG	(Motif sequence only)
gene-ASAT1::NC_090811.1:1242156-1244155(-)	TF_motif_seq_0242	CAATBOX1	709	-	CATTG	(Motif sequence only)
gene-ASAT1::NC_090811.1:1242156-1244155(-)	TF_motif_seq_0242	CAATBOX1	736	+	CAATG	(Motif sequence only)
gene-ASAT1::NC_090811.1:1242156-1244155(-)	TF_motif_seq_0242	CAATBOX1	859	-	AATTG	(Motif sequence only)
gene-ASAT1::NC_090811.1:1242156-1244155(-)	TF_motif_seq_0242	CAATBOX1	895	-	AATTG	(Motif sequence only)
gene-ASAT1::NC_090811.1:1242156-1244155(-)	TF_motif_seq_0242	CAATBOX1	908	+	CAATT	(Motif sequence only)
gene-ASAT1::NC_090811.1:1242156-1244155(-)	TF_motif_seq_0242	CAATBOX1	944	-	CATTG	(Motif sequence only)
gene-ASAT1::NC_090811.1:1242156-1244155(-)	TF_motif_seq_0242	CAATBOX1	1033	-	TATTG	(Motif sequence only)
gene-ASAT1::NC_090811.1:1242156-1244155(-)	TF_motif_seq_0242	CAATBOX1	1049	-	CATTG	(Motif sequence only)
gene-ASAT1::NC_090811.1:1242156-1244155(-)	TF_motif_seq_0242	CAATBOX1	1116	-	AATTG	(Motif sequence only)
gene-ASAT1::NC_090811.1:1242156-1244155(-)	TF_motif_seq_0242	CAATBOX1	1163	-	AATTG	(Motif sequence only)
gene-ASAT1::NC_090811.1:1242156-1244155(-)	TF_motif_seq_0242	CAATBOX1	1189	+	CAATC	(Motif sequence only)
gene-ASAT1::NC_090811.1:1242156-1244155(-)	TF_motif_seq_0242	CAATBOX1	1215	+	CAATC	(Motif sequence only)
gene-ASAT1::NC_090811.1:1242156-1244155(-)	TF_motif_seq_0242	CAATBOX1	1587	+	CAATA	(Motif sequence only)
gene-ASAT1::NC_090811.1:1242156-1244155(-)	TF_motif_seq_0242	CAATBOX1	1621	+	CAATG	(Motif sequence only)
gene-ASAT1::NC_090811.1:1242156-1244155(-)	TF_motif_seq_0242	CAATBOX1	1695	+	CAATA	(Motif sequence only)
gene-ASAT1::NC_090811.1:1242156-1244155(-)	TF_motif_seq_0242	CAATBOX1	1733	-	TATTG	(Motif sequence only)
gene-ASAT1::NC_090811.1:1242156-1244155(-)	TF_motif_seq_0242	CAATBOX1	1800	+	CAATC	(Motif sequence only)
gene-ASAT1::NC_090811.1:1242156-1244155(-)	TF_motif_seq_0242	CAATBOX1	1954	-	CATTG	(Motif sequence only)
gene-ASAT1::NC_090811.1:1242156-1244155(-)	TF_motif_seq_0245	GTGANTG10	123	-	ATCAC	(Motif sequence only)
gene-ASAT1::NC_090811.1:1242156-1244155(-)	TF_motif_seq_0245	GTGANTG10	159	+	GTGAA	(Motif sequence only)
gene-ASAT1::NC_090811.1:1242156-1244155(-)	TF_motif_seq_0245	GTGANTG10	222	-	TTCAC	(Motif sequence only)
gene-ASAT1::NC_090811.1:1242156-1244155(-)	TF_motif_seq_0245	GTGANTG10	427	-	TTCAC	(Motif sequence only)
gene-ASAT1::NC_090811.1:1242156-1244155(-)	TF_motif_seq_0245	GTGANTG10	483	-	GTCAC	(Motif sequence only)
gene-ASAT1::NC_090811.1:1242156-1244155(-)	TF_motif_seq_0245	GTGANTG10	564	-	TTCAC	(Motif sequence only)
gene-ASAT1::NC_090811.1:1242156-1244155(-)	TF_motif_seq_0245	GTGANTG10	575	+	GTGAT	(Motif sequence only)
gene-ASAT1::NC_090811.1:1242156-1244155(-)	TF_motif_seq_0245	GTGANTG10	645	-	TTCAC	(Motif sequence only)
gene-ASAT1::NC_090811.1:1242156-1244155(-)	TF_motif_seq_0245	GTGANTG10	654	+	GTGAA	(Motif sequence only)
gene-ASAT1::NC_090811.1:1242156-1244155(-)	TF_motif_seq_0245	GTGANTG10	674	-	TTCAC	(Motif sequence only)
gene-ASAT1::NC_090811.1:1242156-1244155(-)	TF_motif_seq_0245	GTGANTG10	792	-	GTCAC	(Motif sequence only)
gene-ASAT1::NC_090811.1:1242156-1244155(-)	TF_motif_seq_0245	GTGANTG10	1122	+	GTGAT	(Motif sequence only)
gene-ASAT1::NC_090811.1:1242156-1244155(-)	TF_motif_seq_0245	GTGANTG10	1297	+	GTGAT	(Motif sequence only)
gene-ASAT1::NC_090811.1:1242156-1244155(-)	TF_motif_seq_0245	GTGANTG10	1371	-	CTCAC	(Motif sequence only)
gene-ASAT1::NC_090811.1:1242156-1244155(-)	TF_motif_seq_0245	GTGANTG10	1605	+	GTGAA	(Motif sequence only)
gene-ASAT1::NC_090811.1:1242156-1244155(-)	TF_motif_seq_0245	GTGANTG10	1706	-	TTCAC	(Motif sequence only)
gene-ASAT1::NC_090811.1:1242156-1244155(-)	TF_motif_seq_0245	GTGANTG10	1793	-	ATCAC	(Motif sequence only)
gene-ASAT1::NC_090811.1:1242156-1244155(-)	TF_motif_seq_0245	GTGANTG10	1856	-	ATCAC	(Motif sequence only)
gene-ASAT1::NC_090811.1:1242156-1244155(-)	TF_motif_seq_0247	CACTFTPPCA1	60	-	TAGTG	(Motif sequence only)
gene-ASAT1::NC_090811.1:1242156-1244155(-)	TF_motif_seq_0247	CACTFTPPCA1	66	+	TACTA	(Motif sequence only)
gene-ASAT1::NC_090811.1:1242156-1244155(-)	TF_motif_seq_0247	CACTFTPPCA1	118	+	TACTT	(Motif sequence only)
gene-ASAT1::NC_090811.1:1242156-1244155(-)	TF_motif_seq_0247	CACTFTPPCA1	125	+	CACTT	(Motif sequence only)
gene-ASAT1::NC_090811.1:1242156-1244155(-)	TF_motif_seq_0247	CACTFTPPCA1	175	-	TAGTG	(Motif sequence only)
gene-ASAT1::NC_090811.1:1242156-1244155(-)	TF_motif_seq_0247	CACTFTPPCA1	212	+	TACTT	(Motif sequence only)
gene-ASAT1::NC_090811.1:1242156-1244155(-)	TF_motif_seq_0247	CACTFTPPCA1	224	+	CACTT	(Motif sequence only)
gene-ASAT1::NC_090811.1:1242156-1244155(-)	TF_motif_seq_0247	CACTFTPPCA1	310	+	TACTA	(Motif sequence only)
gene-ASAT1::NC_090811.1:1242156-1244155(-)	TF_motif_seq_0247	CACTFTPPCA1	342	+	TACTG	(Motif sequence only)
gene-ASAT1::NC_090811.1:1242156-1244155(-)	TF_motif_seq_0247	CACTFTPPCA1	429	+	CACTA	(Motif sequence only)
gene-ASAT1::NC_090811.1:1242156-1244155(-)	TF_motif_seq_0247	CACTFTPPCA1	462	-	TAGTG	(Motif sequence only)
gene-ASAT1::NC_090811.1:1242156-1244155(-)	TF_motif_seq_0247	CACTFTPPCA1	475	+	CACTC	(Motif sequence only)
gene-ASAT1::NC_090811.1:1242156-1244155(-)	TF_motif_seq_0247	CACTFTPPCA1	485	+	CACTA	(Motif sequence only)
gene-ASAT1::NC_090811.1:1242156-1244155(-)	TF_motif_seq_0247	CACTFTPPCA1	569	+	CACTC	(Motif sequence only)
gene-ASAT1::NC_090811.1:1242156-1244155(-)	TF_motif_seq_0247	CACTFTPPCA1	573	-	CAGTG	(Motif sequence only)
gene-ASAT1::NC_090811.1:1242156-1244155(-)	TF_motif_seq_0247	CACTFTPPCA1	652	-	TAGTG	(Motif sequence only)
gene-ASAT1::NC_090811.1:1242156-1244155(-)	TF_motif_seq_0247	CACTFTPPCA1	794	+	CACTT	(Motif sequence only)
gene-ASAT1::NC_090811.1:1242156-1244155(-)	TF_motif_seq_0247	CACTFTPPCA1	917	-	GAGTA	(Motif sequence only)
gene-ASAT1::NC_090811.1:1242156-1244155(-)	TF_motif_seq_0247	CACTFTPPCA1	962	+	TACTT	(Motif sequence only)
gene-ASAT1::NC_090811.1:1242156-1244155(-)	TF_motif_seq_0247	CACTFTPPCA1	1245	+	TACTA	(Motif sequence only)
gene-ASAT1::NC_090811.1:1242156-1244155(-)	TF_motif_seq_0247	CACTFTPPCA1	1295	-	TAGTG	(Motif sequence only)
gene-ASAT1::NC_090811.1:1242156-1244155(-)	TF_motif_seq_0247	CACTFTPPCA1	1417	+	TACTT	(Motif sequence only)
gene-ASAT1::NC_090811.1:1242156-1244155(-)	TF_motif_seq_0247	CACTFTPPCA1	1433	-	TAGTG	(Motif sequence only)
gene-ASAT1::NC_090811.1:1242156-1244155(-)	TF_motif_seq_0247	CACTFTPPCA1	1495	+	TACTC	(Motif sequence only)
gene-ASAT1::NC_090811.1:1242156-1244155(-)	TF_motif_seq_0247	CACTFTPPCA1	1570	+	TACTT	(Motif sequence only)
gene-ASAT1::NC_090811.1:1242156-1244155(-)	TF_motif_seq_0247	CACTFTPPCA1	1597	+	CACTC	(Motif sequence only)
gene-ASAT1::NC_090811.1:1242156-1244155(-)	TF_motif_seq_0247	CACTFTPPCA1	1601	-	CAGTG	(Motif sequence only)
gene-ASAT1::NC_090811.1:1242156-1244155(-)	TF_motif_seq_0247	CACTFTPPCA1	1726	+	TACTC	(Motif sequence only)
gene-ASAT1::NC_090811.1:1242156-1244155(-)	TF_motif_seq_0247	CACTFTPPCA1	1756	+	CACTT	(Motif sequence only)
gene-ASAT1::NC_090811.1:1242156-1244155(-)	TF_motif_seq_0247	CACTFTPPCA1	1808	+	TACTG	(Motif sequence only)
gene-ASAT1::NC_090811.1:1242156-1244155(-)	TF_motif_seq_0247	CACTFTPPCA1	1924	-	TAGTA	(Motif sequence only)
gene-ASAT1::NC_090811.1:1242156-1244155(-)	TF_motif_seq_0247	CACTFTPPCA1	1948	-	AAGTG	(Motif sequence only)
gene-ASAT1::NC_090811.1:1242156-1244155(-)	TF_motif_seq_0248	MYBCOREATCYCB1	50	+	AACTG	(Motif sequence only)
gene-ASAT1::NC_090811.1:1242156-1244155(-)	TF_motif_seq_0248	MYBCOREATCYCB1	374	-	ACGTT	(Motif sequence only)
gene-ASAT1::NC_090811.1:1242156-1244155(-)	TF_motif_seq_0248	MYBCOREATCYCB1	380	+	AACGG	(Motif sequence only)
gene-ASAT1::NC_090811.1:1242156-1244155(-)	TF_motif_seq_0248	MYBCOREATCYCB1	407	-	CCCTT	(Motif sequence only)
gene-ASAT1::NC_090811.1:1242156-1244155(-)	TF_motif_seq_0248	MYBCOREATCYCB1	408	-	CCTTT	(Motif sequence only)
gene-ASAT1::NC_090811.1:1242156-1244155(-)	TF_motif_seq_0248	MYBCOREATCYCB1	416	-	CTGTT	(Motif sequence only)
gene-ASAT1::NC_090811.1:1242156-1244155(-)	TF_motif_seq_0248	MYBCOREATCYCB1	530	-	CCGTT	(Motif sequence only)
gene-ASAT1::NC_090811.1:1242156-1244155(-)	TF_motif_seq_0248	MYBCOREATCYCB1	637	-	CTGTT	(Motif sequence only)
gene-ASAT1::NC_090811.1:1242156-1244155(-)	TF_motif_seq_0248	MYBCOREATCYCB1	642	-	CTGTT	(Motif sequence only)
gene-ASAT1::NC_090811.1:1242156-1244155(-)	TF_motif_seq_0248	MYBCOREATCYCB1	737	+	AATGG	(Motif sequence only)
gene-ASAT1::NC_090811.1:1242156-1244155(-)	TF_motif_seq_0248	MYBCOREATCYCB1	766	-	CCCTT	(Motif sequence only)
gene-ASAT1::NC_090811.1:1242156-1244155(-)	TF_motif_seq_0248	MYBCOREATCYCB1	783	-	CAGTT	(Motif sequence only)
gene-ASAT1::NC_090811.1:1242156-1244155(-)	TF_motif_seq_0248	MYBCOREATCYCB1	835	-	CTGTT	(Motif sequence only)
gene-ASAT1::NC_090811.1:1242156-1244155(-)	TF_motif_seq_0248	MYBCOREATCYCB1	991	-	CCTTT	(Motif sequence only)
gene-ASAT1::NC_090811.1:1242156-1244155(-)	TF_motif_seq_0248	MYBCOREATCYCB1	1107	+	AACTG	(Motif sequence only)
gene-ASAT1::NC_090811.1:1242156-1244155(-)	TF_motif_seq_0248	MYBCOREATCYCB1	1228	+	GACGG	(Motif sequence only)
gene-ASAT1::NC_090811.1:1242156-1244155(-)	TF_motif_seq_0248	MYBCOREATCYCB1	1230	-	CGGTT	(Motif sequence only)
gene-ASAT1::NC_090811.1:1242156-1244155(-)	TF_motif_seq_0248	MYBCOREATCYCB1	1257	+	AAAGG	(Motif sequence only)
gene-ASAT1::NC_090811.1:1242156-1244155(-)	TF_motif_seq_0248	MYBCOREATCYCB1	1258	+	AAGGG	(Motif sequence only)
gene-ASAT1::NC_090811.1:1242156-1244155(-)	TF_motif_seq_0248	MYBCOREATCYCB1	1386	-	CCTTT	(Motif sequence only)
gene-ASAT1::NC_090811.1:1242156-1244155(-)	TF_motif_seq_0248	MYBCOREATCYCB1	1490	+	ATCGG	(Motif sequence only)
gene-ASAT1::NC_090811.1:1242156-1244155(-)	TF_motif_seq_0248	MYBCOREATCYCB1	1517	+	AACGA	(Motif sequence only)
gene-ASAT1::NC_090811.1:1242156-1244155(-)	TF_motif_seq_0248	MYBCOREATCYCB1	1622	+	AATGG	(Motif sequence only)
gene-ASAT1::NC_090811.1:1242156-1244155(-)	TF_motif_seq_0248	MYBCOREATCYCB1	1641	+	AAAGG	(Motif sequence only)
gene-ASAT1::NC_090811.1:1242156-1244155(-)	TF_motif_seq_0248	MYBCOREATCYCB1	1778	+	TACGG	(Motif sequence only)
gene-ASAT1::NC_090811.1:1242156-1244155(-)	TF_motif_seq_0248	MYBCOREATCYCB1	1804	-	CCGAT	(Motif sequence only)
gene-ASAT1::NC_090811.1:1242156-1244155(-)	TF_motif_seq_0248	MYBCOREATCYCB1	1972	-	CCATT	(Motif sequence only)
gene-ASAT1::NC_090811.1:1242156-1244155(-)	TF_motif_seq_0249	ABRELATERD1	125	-	CACTT	(Motif sequence only)
gene-ASAT1::NC_090811.1:1242156-1244155(-)	TF_motif_seq_0249	ABRELATERD1	126	+	ACTTG	(Motif sequence only)
gene-ASAT1::NC_090811.1:1242156-1244155(-)	TF_motif_seq_0249	ABRELATERD1	131	-	CAAGT	(Motif sequence only)
gene-ASAT1::NC_090811.1:1242156-1244155(-)	TF_motif_seq_0249	ABRELATERD1	224	-	CACTT	(Motif sequence only)
gene-ASAT1::NC_090811.1:1242156-1244155(-)	TF_motif_seq_0249	ABRELATERD1	285	-	CACGA	(Motif sequence only)
gene-ASAT1::NC_090811.1:1242156-1244155(-)	TF_motif_seq_0249	ABRELATERD1	359	-	CACGA	(Motif sequence only)
gene-ASAT1::NC_090811.1:1242156-1244155(-)	TF_motif_seq_0249	ABRELATERD1	373	-	TACGT	(Motif sequence only)
gene-ASAT1::NC_090811.1:1242156-1244155(-)	TF_motif_seq_0249	ABRELATERD1	374	+	ACGTT	(Motif sequence only)
gene-ASAT1::NC_090811.1:1242156-1244155(-)	TF_motif_seq_0249	ABRELATERD1	586	-	CACCT	(Motif sequence only)
gene-ASAT1::NC_090811.1:1242156-1244155(-)	TF_motif_seq_0249	ABRELATERD1	634	-	CACCT	(Motif sequence only)
gene-ASAT1::NC_090811.1:1242156-1244155(-)	TF_motif_seq_0249	ABRELATERD1	635	+	ACCTG	(Motif sequence only)
gene-ASAT1::NC_090811.1:1242156-1244155(-)	TF_motif_seq_0249	ABRELATERD1	676	-	CACAT	(Motif sequence only)
gene-ASAT1::NC_090811.1:1242156-1244155(-)	TF_motif_seq_0249	ABRELATERD1	794	-	CACTT	(Motif sequence only)
gene-ASAT1::NC_090811.1:1242156-1244155(-)	TF_motif_seq_0249	ABRELATERD1	795	+	ACTTG	(Motif sequence only)
gene-ASAT1::NC_090811.1:1242156-1244155(-)	TF_motif_seq_0249	ABRELATERD1	1000	-	CACGA	(Motif sequence only)
gene-ASAT1::NC_090811.1:1242156-1244155(-)	TF_motif_seq_0249	ABRELATERD1	1054	+	TCGTG	(Motif sequence only)
gene-ASAT1::NC_090811.1:1242156-1244155(-)	TF_motif_seq_0249	ABRELATERD1	1076	+	ACGCG	(Motif sequence only)
gene-ASAT1::NC_090811.1:1242156-1244155(-)	TF_motif_seq_0249	ABRELATERD1	1204	+	ACCTG	(Motif sequence only)
gene-ASAT1::NC_090811.1:1242156-1244155(-)	TF_motif_seq_0249	ABRELATERD1	1235	-	CTCGT	(Motif sequence only)
gene-ASAT1::NC_090811.1:1242156-1244155(-)	TF_motif_seq_0249	ABRELATERD1	1355	-	CATGT	(Motif sequence only)
gene-ASAT1::NC_090811.1:1242156-1244155(-)	TF_motif_seq_0249	ABRELATERD1	1363	+	ACATG	(Motif sequence only)
gene-ASAT1::NC_090811.1:1242156-1244155(-)	TF_motif_seq_0249	ABRELATERD1	1364	-	CATGT	(Motif sequence only)
gene-ASAT1::NC_090811.1:1242156-1244155(-)	TF_motif_seq_0249	ABRELATERD1	1708	-	CACAT	(Motif sequence only)
gene-ASAT1::NC_090811.1:1242156-1244155(-)	TF_motif_seq_0249	ABRELATERD1	1748	-	CACGC	(Motif sequence only)
gene-ASAT1::NC_090811.1:1242156-1244155(-)	TF_motif_seq_0249	ABRELATERD1	1752	-	CACGC	(Motif sequence only)
gene-ASAT1::NC_090811.1:1242156-1244155(-)	TF_motif_seq_0249	ABRELATERD1	1756	-	CACTT	(Motif sequence only)
gene-ASAT1::NC_090811.1:1242156-1244155(-)	TF_motif_seq_0249	ABRELATERD1	1779	+	ACGGG	(Motif sequence only)
gene-ASAT1::NC_090811.1:1242156-1244155(-)	TF_motif_seq_0249	ABRELATERD1	1795	-	CACCT	(Motif sequence only)
gene-ASAT1::NC_090811.1:1242156-1244155(-)	TF_motif_seq_0249	ABRELATERD1	1825	-	CACCT	(Motif sequence only)
gene-ASAT1::NC_090811.1:1242156-1244155(-)	TF_motif_seq_0249	ABRELATERD1	1841	+	ACGAG	(Motif sequence only)
gene-ASAT1::NC_090811.1:1242156-1244155(-)	TF_motif_seq_0249	ABRELATERD1	1858	-	CACCT	(Motif sequence only)
gene-ASAT1::NC_090811.1:1242156-1244155(-)	TF_motif_seq_0249	ABRELATERD1	1934	+	ACATG	(Motif sequence only)
gene-ASAT1::NC_090811.1:1242156-1244155(-)	TF_motif_seq_0249	ABRELATERD1	1948	+	AAGTG	(Motif sequence only)
gene-ASAT1::NC_090811.1:1242156-1244155(-)	TF_motif_seq_0250	POLLEN1LELAT52	86	-	TTTCT	(Motif sequence only)
gene-ASAT1::NC_090811.1:1242156-1244155(-)	TF_motif_seq_0250	POLLEN1LELAT52	240	+	AGAAA	(Motif sequence only)
gene-ASAT1::NC_090811.1:1242156-1244155(-)	TF_motif_seq_0250	POLLEN1LELAT52	598	-	TTTCT	(Motif sequence only)
gene-ASAT1::NC_090811.1:1242156-1244155(-)	TF_motif_seq_0250	POLLEN1LELAT52	665	+	AGAAA	(Motif sequence only)
gene-ASAT1::NC_090811.1:1242156-1244155(-)	TF_motif_seq_0250	POLLEN1LELAT52	849	+	AGAAA	(Motif sequence only)
gene-ASAT1::NC_090811.1:1242156-1244155(-)	TF_motif_seq_0250	POLLEN1LELAT52	954	-	TTTCT	(Motif sequence only)
gene-ASAT1::NC_090811.1:1242156-1244155(-)	TF_motif_seq_0250	POLLEN1LELAT52	1095	+	AGAAA	(Motif sequence only)
gene-ASAT1::NC_090811.1:1242156-1244155(-)	TF_motif_seq_0250	POLLEN1LELAT52	1312	-	TTTCT	(Motif sequence only)
gene-ASAT1::NC_090811.1:1242156-1244155(-)	TF_motif_seq_0250	POLLEN1LELAT52	1456	+	AGAAA	(Motif sequence only)
gene-ASAT1::NC_090811.1:1242156-1244155(-)	TF_motif_seq_0250	POLLEN1LELAT52	1666	+	AGAAA	(Motif sequence only)
gene-ASAT1::NC_090811.1:1242156-1244155(-)	TF_motif_seq_0250	POLLEN1LELAT52	1689	+	AGAAA	(Motif sequence only)
gene-ASAT1::NC_090811.1:1242156-1244155(-)	TF_motif_seq_0253	ROOTMOTIFTAPOX1	183	-	AATAT	(Motif sequence only)
gene-ASAT1::NC_090811.1:1242156-1244155(-)	TF_motif_seq_0253	ROOTMOTIFTAPOX1	278	-	AATAT	(Motif sequence only)
gene-ASAT1::NC_090811.1:1242156-1244155(-)	TF_motif_seq_0253	ROOTMOTIFTAPOX1	279	+	ATATT	(Motif sequence only)
gene-ASAT1::NC_090811.1:1242156-1244155(-)	TF_motif_seq_0253	ROOTMOTIFTAPOX1	423	+	ATATT	(Motif sequence only)
gene-ASAT1::NC_090811.1:1242156-1244155(-)	TF_motif_seq_0253	ROOTMOTIFTAPOX1	434	-	AATAT	(Motif sequence only)
gene-ASAT1::NC_090811.1:1242156-1244155(-)	TF_motif_seq_0253	ROOTMOTIFTAPOX1	444	-	AATAT	(Motif sequence only)
gene-ASAT1::NC_090811.1:1242156-1244155(-)	TF_motif_seq_0253	ROOTMOTIFTAPOX1	445	+	ATATT	(Motif sequence only)
gene-ASAT1::NC_090811.1:1242156-1244155(-)	TF_motif_seq_0253	ROOTMOTIFTAPOX1	671	+	ATATT	(Motif sequence only)
gene-ASAT1::NC_090811.1:1242156-1244155(-)	TF_motif_seq_0253	ROOTMOTIFTAPOX1	823	+	ATATT	(Motif sequence only)
gene-ASAT1::NC_090811.1:1242156-1244155(-)	TF_motif_seq_0253	ROOTMOTIFTAPOX1	882	-	AATAT	(Motif sequence only)
gene-ASAT1::NC_090811.1:1242156-1244155(-)	TF_motif_seq_0253	ROOTMOTIFTAPOX1	982	+	ATATT	(Motif sequence only)
gene-ASAT1::NC_090811.1:1242156-1244155(-)	TF_motif_seq_0253	ROOTMOTIFTAPOX1	1501	+	ATATT	(Motif sequence only)
gene-ASAT1::NC_090811.1:1242156-1244155(-)	TF_motif_seq_0253	ROOTMOTIFTAPOX1	1576	-	AATAT	(Motif sequence only)
gene-ASAT1::NC_090811.1:1242156-1244155(-)	TF_motif_seq_0253	ROOTMOTIFTAPOX1	1577	+	ATATT	(Motif sequence only)
gene-ASAT1::NC_090811.1:1242156-1244155(-)	TF_motif_seq_0253	ROOTMOTIFTAPOX1	1612	-	AATAT	(Motif sequence only)
gene-ASAT1::NC_090811.1:1242156-1244155(-)	TF_motif_seq_0253	ROOTMOTIFTAPOX1	1732	+	ATATT	(Motif sequence only)
gene-ASAT1::NC_090811.1:1242156-1244155(-)	TF_motif_seq_0259	CGACGOSAMY3	226	-	CTTCG	(Motif sequence only)
gene-ASAT1::NC_090811.1:1242156-1244155(-)	TF_motif_seq_0259	CGACGOSAMY3	358	+	CCACG	(Motif sequence only)
gene-ASAT1::NC_090811.1:1242156-1244155(-)	TF_motif_seq_0259	CGACGOSAMY3	361	+	CGATG	(Motif sequence only)
gene-ASAT1::NC_090811.1:1242156-1244155(-)	TF_motif_seq_0259	CGACGOSAMY3	379	+	CAACG	(Motif sequence only)
gene-ASAT1::NC_090811.1:1242156-1244155(-)	TF_motif_seq_0259	CGACGOSAMY3	479	+	CGAGG	(Motif sequence only)
gene-ASAT1::NC_090811.1:1242156-1244155(-)	TF_motif_seq_0259	CGACGOSAMY3	1052	-	TGTCG	(Motif sequence only)
gene-ASAT1::NC_090811.1:1242156-1244155(-)	TF_motif_seq_0259	CGACGOSAMY3	1099	+	AGACG	(Motif sequence only)
gene-ASAT1::NC_090811.1:1242156-1244155(-)	TF_motif_seq_0259	CGACGOSAMY3	1102	+	CGAAG	(Motif sequence only)
gene-ASAT1::NC_090811.1:1242156-1244155(-)	TF_motif_seq_0259	CGACGOSAMY3	1140	-	AGTCG	(Motif sequence only)
gene-ASAT1::NC_090811.1:1242156-1244155(-)	TF_motif_seq_0259	CGACGOSAMY3	1224	+	AGACG	(Motif sequence only)
gene-ASAT1::NC_090811.1:1242156-1244155(-)	TF_motif_seq_0259	CGACGOSAMY3	1227	+	CGACG	(Motif sequence only)
gene-ASAT1::NC_090811.1:1242156-1244155(-)	TF_motif_seq_0259	CGACGOSAMY3	1227	-	CGACG	(Motif sequence only)
gene-ASAT1::NC_090811.1:1242156-1244155(-)	TF_motif_seq_0259	CGACGOSAMY3	1617	+	CGACC	(Motif sequence only)
gene-ASAT1::NC_090811.1:1242156-1244155(-)	TF_motif_seq_0259	CGACGOSAMY3	1758	-	CTTCG	(Motif sequence only)
gene-ASAT1::NC_090811.1:1242156-1244155(-)	TF_motif_seq_0259	CGACGOSAMY3	1761	+	CGACT	(Motif sequence only)
gene-ASAT1::NC_090811.1:1242156-1244155(-)	TF_motif_seq_0259	CGACGOSAMY3	1769	+	CGACT	(Motif sequence only)
gene-ASAT1::NC_090811.1:1242156-1244155(-)	TF_motif_seq_0259	CGACGOSAMY3	1777	+	CTACG	(Motif sequence only)
gene-ASAT1::NC_090811.1:1242156-1244155(-)	TF_motif_seq_0259	CGACGOSAMY3	1830	-	AGTCG	(Motif sequence only)
gene-ASAT1::NC_090811.1:1242156-1244155(-)	TF_motif_seq_0259	CGACGOSAMY3	1839	+	TGACG	(Motif sequence only)
gene-ASAT1::NC_090811.1:1242156-1244155(-)	TF_motif_seq_0259	CGACGOSAMY3	1875	-	CGTCT	(Motif sequence only)
gene-ASAT1::NC_090811.1:1242156-1244155(-)	TF_motif_seq_0260	OSE2ROOTNODULE	43	-	AAGAG	(Motif sequence only)
gene-ASAT1::NC_090811.1:1242156-1244155(-)	TF_motif_seq_0260	OSE2ROOTNODULE	188	+	CTCTT	(Motif sequence only)
gene-ASAT1::NC_090811.1:1242156-1244155(-)	TF_motif_seq_0260	OSE2ROOTNODULE	267	+	CTCTT	(Motif sequence only)
gene-ASAT1::NC_090811.1:1242156-1244155(-)	TF_motif_seq_0260	OSE2ROOTNODULE	720	-	AAGAG	(Motif sequence only)
gene-ASAT1::NC_090811.1:1242156-1244155(-)	TF_motif_seq_0260	OSE2ROOTNODULE	1008	-	AAGAG	(Motif sequence only)
gene-ASAT1::NC_090811.1:1242156-1244155(-)	TF_motif_seq_0260	OSE2ROOTNODULE	1392	+	CTCTT	(Motif sequence only)
gene-ASAT1::NC_090811.1:1242156-1244155(-)	TF_motif_seq_0261	SURECOREATSULTR11	45	+	GAGAC	(Motif sequence only)
gene-ASAT1::NC_090811.1:1242156-1244155(-)	TF_motif_seq_0261	SURECOREATSULTR11	82	-	GTCTT	(Motif sequence only)
gene-ASAT1::NC_090811.1:1242156-1244155(-)	TF_motif_seq_0261	SURECOREATSULTR11	109	+	TAGAC	(Motif sequence only)
gene-ASAT1::NC_090811.1:1242156-1244155(-)	TF_motif_seq_0261	SURECOREATSULTR11	140	-	GTGTC	(Motif sequence only)
gene-ASAT1::NC_090811.1:1242156-1244155(-)	TF_motif_seq_0261	SURECOREATSULTR11	152	+	AAGAC	(Motif sequence only)
gene-ASAT1::NC_090811.1:1242156-1244155(-)	TF_motif_seq_0261	SURECOREATSULTR11	186	-	ATCTC	(Motif sequence only)
gene-ASAT1::NC_090811.1:1242156-1244155(-)	TF_motif_seq_0261	SURECOREATSULTR11	194	-	GTCTT	(Motif sequence only)
gene-ASAT1::NC_090811.1:1242156-1244155(-)	TF_motif_seq_0261	SURECOREATSULTR11	323	+	GAGAG	(Motif sequence only)
gene-ASAT1::NC_090811.1:1242156-1244155(-)	TF_motif_seq_0261	SURECOREATSULTR11	325	+	GAGAT	(Motif sequence only)
gene-ASAT1::NC_090811.1:1242156-1244155(-)	TF_motif_seq_0261	SURECOREATSULTR11	483	-	GTCAC	(Motif sequence only)
gene-ASAT1::NC_090811.1:1242156-1244155(-)	TF_motif_seq_0261	SURECOREATSULTR11	620	+	AAGAC	(Motif sequence only)
gene-ASAT1::NC_090811.1:1242156-1244155(-)	TF_motif_seq_0261	SURECOREATSULTR11	666	+	GAAAC	(Motif sequence only)
gene-ASAT1::NC_090811.1:1242156-1244155(-)	TF_motif_seq_0261	SURECOREATSULTR11	688	-	CTCTC	(Motif sequence only)
gene-ASAT1::NC_090811.1:1242156-1244155(-)	TF_motif_seq_0261	SURECOREATSULTR11	722	+	GAGAC	(Motif sequence only)
gene-ASAT1::NC_090811.1:1242156-1244155(-)	TF_motif_seq_0261	SURECOREATSULTR11	741	+	GAGAA	(Motif sequence only)
gene-ASAT1::NC_090811.1:1242156-1244155(-)	TF_motif_seq_0261	SURECOREATSULTR11	750	+	AAGAC	(Motif sequence only)
gene-ASAT1::NC_090811.1:1242156-1244155(-)	TF_motif_seq_0261	SURECOREATSULTR11	771	-	GTTTC	(Motif sequence only)
gene-ASAT1::NC_090811.1:1242156-1244155(-)	TF_motif_seq_0261	SURECOREATSULTR11	792	-	GTCAC	(Motif sequence only)
gene-ASAT1::NC_090811.1:1242156-1244155(-)	TF_motif_seq_0261	SURECOREATSULTR11	808	-	GTATC	(Motif sequence only)
gene-ASAT1::NC_090811.1:1242156-1244155(-)	TF_motif_seq_0261	SURECOREATSULTR11	948	+	GAGAT	(Motif sequence only)
gene-ASAT1::NC_090811.1:1242156-1244155(-)	TF_motif_seq_0261	SURECOREATSULTR11	1010	+	GAGAA	(Motif sequence only)
gene-ASAT1::NC_090811.1:1242156-1244155(-)	TF_motif_seq_0261	SURECOREATSULTR11	1037	+	GAGAT	(Motif sequence only)
gene-ASAT1::NC_090811.1:1242156-1244155(-)	TF_motif_seq_0261	SURECOREATSULTR11	1098	+	AAGAC	(Motif sequence only)
gene-ASAT1::NC_090811.1:1242156-1244155(-)	TF_motif_seq_0261	SURECOREATSULTR11	1201	+	AAGAC	(Motif sequence only)
gene-ASAT1::NC_090811.1:1242156-1244155(-)	TF_motif_seq_0261	SURECOREATSULTR11	1223	+	CAGAC	(Motif sequence only)
gene-ASAT1::NC_090811.1:1242156-1244155(-)	TF_motif_seq_0261	SURECOREATSULTR11	1233	-	TTCTC	(Motif sequence only)
gene-ASAT1::NC_090811.1:1242156-1244155(-)	TF_motif_seq_0261	SURECOREATSULTR11	1290	+	AAGAC	(Motif sequence only)
gene-ASAT1::NC_090811.1:1242156-1244155(-)	TF_motif_seq_0261	SURECOREATSULTR11	1367	-	GTCCC	(Motif sequence only)
gene-ASAT1::NC_090811.1:1242156-1244155(-)	TF_motif_seq_0261	SURECOREATSULTR11	1402	-	GTCTT	(Motif sequence only)
gene-ASAT1::NC_090811.1:1242156-1244155(-)	TF_motif_seq_0261	SURECOREATSULTR11	1656	+	GAGAT	(Motif sequence only)
gene-ASAT1::NC_090811.1:1242156-1244155(-)	TF_motif_seq_0261	SURECOREATSULTR11	1737	+	GACAC	(Motif sequence only)
gene-ASAT1::NC_090811.1:1242156-1244155(-)	TF_motif_seq_0261	SURECOREATSULTR11	1783	+	GATAC	(Motif sequence only)
gene-ASAT1::NC_090811.1:1242156-1244155(-)	TF_motif_seq_0261	SURECOREATSULTR11	1806	+	GATAC	(Motif sequence only)
gene-ASAT1::NC_090811.1:1242156-1244155(-)	TF_motif_seq_0261	SURECOREATSULTR11	1843	+	GAGAG	(Motif sequence only)
gene-ASAT1::NC_090811.1:1242156-1244155(-)	TF_motif_seq_0261	SURECOREATSULTR11	1876	-	GTCTA	(Motif sequence only)
gene-ASAT1::NC_090811.1:1242156-1244155(-)	TF_motif_seq_0261	SURECOREATSULTR11	1919	+	AAGAC	(Motif sequence only)
gene-ASAT1::NC_090811.1:1242156-1244155(-)	TF_motif_seq_0262	IBOXCORE	1	-	TTATT	(Motif sequence only)
gene-ASAT1::NC_090811.1:1242156-1244155(-)	TF_motif_seq_0262	IBOXCORE	22	-	TTATT	(Motif sequence only)
gene-ASAT1::NC_090811.1:1242156-1244155(-)	TF_motif_seq_0262	IBOXCORE	47	+	GACAA	(Motif sequence only)
gene-ASAT1::NC_090811.1:1242156-1244155(-)	TF_motif_seq_0262	IBOXCORE	85	-	TTTTC	(Motif sequence only)
gene-ASAT1::NC_090811.1:1242156-1244155(-)	TF_motif_seq_0262	IBOXCORE	115	+	GATTA	(Motif sequence only)
gene-ASAT1::NC_090811.1:1242156-1244155(-)	TF_motif_seq_0262	IBOXCORE	121	-	TTATC	(Motif sequence only)
gene-ASAT1::NC_090811.1:1242156-1244155(-)	TF_motif_seq_0262	IBOXCORE	166	-	TTATT	(Motif sequence only)
gene-ASAT1::NC_090811.1:1242156-1244155(-)	TF_motif_seq_0262	IBOXCORE	180	+	CATAA	(Motif sequence only)
gene-ASAT1::NC_090811.1:1242156-1244155(-)	TF_motif_seq_0262	IBOXCORE	184	-	ATATC	(Motif sequence only)
gene-ASAT1::NC_090811.1:1242156-1244155(-)	TF_motif_seq_0262	IBOXCORE	220	-	TTTTC	(Motif sequence only)
gene-ASAT1::NC_090811.1:1242156-1244155(-)	TF_motif_seq_0262	IBOXCORE	235	+	AATAA	(Motif sequence only)
gene-ASAT1::NC_090811.1:1242156-1244155(-)	TF_motif_seq_0262	IBOXCORE	262	+	GACAA	(Motif sequence only)
gene-ASAT1::NC_090811.1:1242156-1244155(-)	TF_motif_seq_0262	IBOXCORE	288	+	GATTA	(Motif sequence only)
gene-ASAT1::NC_090811.1:1242156-1244155(-)	TF_motif_seq_0262	IBOXCORE	305	+	AATAA	(Motif sequence only)
gene-ASAT1::NC_090811.1:1242156-1244155(-)	TF_motif_seq_0262	IBOXCORE	318	-	TTATC	(Motif sequence only)
gene-ASAT1::NC_090811.1:1242156-1244155(-)	TF_motif_seq_0262	IBOXCORE	337	-	TTATA	(Motif sequence only)
gene-ASAT1::NC_090811.1:1242156-1244155(-)	TF_motif_seq_0262	IBOXCORE	346	+	GACAA	(Motif sequence only)
gene-ASAT1::NC_090811.1:1242156-1244155(-)	TF_motif_seq_0262	IBOXCORE	412	-	TTATC	(Motif sequence only)
gene-ASAT1::NC_090811.1:1242156-1244155(-)	TF_motif_seq_0262	IBOXCORE	419	-	TTATA	(Motif sequence only)
gene-ASAT1::NC_090811.1:1242156-1244155(-)	TF_motif_seq_0262	IBOXCORE	440	+	TATAA	(Motif sequence only)
gene-ASAT1::NC_090811.1:1242156-1244155(-)	TF_motif_seq_0262	IBOXCORE	468	-	TTATT	(Motif sequence only)
gene-ASAT1::NC_090811.1:1242156-1244155(-)	TF_motif_seq_0262	IBOXCORE	471	-	TTAGC	(Motif sequence only)
gene-ASAT1::NC_090811.1:1242156-1244155(-)	TF_motif_seq_0262	IBOXCORE	507	+	CATAA	(Motif sequence only)
gene-ASAT1::NC_090811.1:1242156-1244155(-)	TF_motif_seq_0262	IBOXCORE	524	+	GAAAA	(Motif sequence only)
gene-ASAT1::NC_090811.1:1242156-1244155(-)	TF_motif_seq_0262	IBOXCORE	562	-	TTTTC	(Motif sequence only)
gene-ASAT1::NC_090811.1:1242156-1244155(-)	TF_motif_seq_0262	IBOXCORE	577	+	GATAA	(Motif sequence only)
gene-ASAT1::NC_090811.1:1242156-1244155(-)	TF_motif_seq_0262	IBOXCORE	602	-	TGATC	(Motif sequence only)
gene-ASAT1::NC_090811.1:1242156-1244155(-)	TF_motif_seq_0262	IBOXCORE	613	+	GCTAA	(Motif sequence only)
gene-ASAT1::NC_090811.1:1242156-1244155(-)	TF_motif_seq_0262	IBOXCORE	724	+	GACAA	(Motif sequence only)
gene-ASAT1::NC_090811.1:1242156-1244155(-)	TF_motif_seq_0262	IBOXCORE	731	+	GATAA	(Motif sequence only)
gene-ASAT1::NC_090811.1:1242156-1244155(-)	TF_motif_seq_0262	IBOXCORE	741	+	GAGAA	(Motif sequence only)
gene-ASAT1::NC_090811.1:1242156-1244155(-)	TF_motif_seq_0262	IBOXCORE	747	+	CATAA	(Motif sequence only)
gene-ASAT1::NC_090811.1:1242156-1244155(-)	TF_motif_seq_0262	IBOXCORE	790	-	TTGTC	(Motif sequence only)
gene-ASAT1::NC_090811.1:1242156-1244155(-)	TF_motif_seq_0262	IBOXCORE	799	+	GATTA	(Motif sequence only)
gene-ASAT1::NC_090811.1:1242156-1244155(-)	TF_motif_seq_0262	IBOXCORE	808	-	GTATC	(Motif sequence only)
gene-ASAT1::NC_090811.1:1242156-1244155(-)	TF_motif_seq_0262	IBOXCORE	821	-	TTATA	(Motif sequence only)
gene-ASAT1::NC_090811.1:1242156-1244155(-)	TF_motif_seq_0262	IBOXCORE	839	-	TTATT	(Motif sequence only)
gene-ASAT1::NC_090811.1:1242156-1244155(-)	TF_motif_seq_0262	IBOXCORE	850	+	GAAAA	(Motif sequence only)
gene-ASAT1::NC_090811.1:1242156-1244155(-)	TF_motif_seq_0262	IBOXCORE	863	+	GATAA	(Motif sequence only)
gene-ASAT1::NC_090811.1:1242156-1244155(-)	TF_motif_seq_0262	IBOXCORE	886	+	TATAA	(Motif sequence only)
gene-ASAT1::NC_090811.1:1242156-1244155(-)	TF_motif_seq_0262	IBOXCORE	903	+	GAAAA	(Motif sequence only)
gene-ASAT1::NC_090811.1:1242156-1244155(-)	TF_motif_seq_0262	IBOXCORE	924	-	TTATT	(Motif sequence only)
gene-ASAT1::NC_090811.1:1242156-1244155(-)	TF_motif_seq_0262	IBOXCORE	927	-	TTATG	(Motif sequence only)
gene-ASAT1::NC_090811.1:1242156-1244155(-)	TF_motif_seq_0262	IBOXCORE	931	+	GAAAA	(Motif sequence only)
gene-ASAT1::NC_090811.1:1242156-1244155(-)	TF_motif_seq_0262	IBOXCORE	934	+	AATAA	(Motif sequence only)
gene-ASAT1::NC_090811.1:1242156-1244155(-)	TF_motif_seq_0262	IBOXCORE	940	-	TTTTC	(Motif sequence only)
gene-ASAT1::NC_090811.1:1242156-1244155(-)	TF_motif_seq_0262	IBOXCORE	953	-	TTTTC	(Motif sequence only)
gene-ASAT1::NC_090811.1:1242156-1244155(-)	TF_motif_seq_0262	IBOXCORE	968	+	GATGA	(Motif sequence only)
gene-ASAT1::NC_090811.1:1242156-1244155(-)	TF_motif_seq_0262	IBOXCORE	970	-	TGATC	(Motif sequence only)
gene-ASAT1::NC_090811.1:1242156-1244155(-)	TF_motif_seq_0262	IBOXCORE	971	+	GATCA	(Motif sequence only)
gene-ASAT1::NC_090811.1:1242156-1244155(-)	TF_motif_seq_0262	IBOXCORE	981	+	GATAT	(Motif sequence only)
gene-ASAT1::NC_090811.1:1242156-1244155(-)	TF_motif_seq_0262	IBOXCORE	994	-	TTATC	(Motif sequence only)
gene-ASAT1::NC_090811.1:1242156-1244155(-)	TF_motif_seq_0262	IBOXCORE	1003	+	GATAT	(Motif sequence only)
gene-ASAT1::NC_090811.1:1242156-1244155(-)	TF_motif_seq_0262	IBOXCORE	1005	+	TATAA	(Motif sequence only)
gene-ASAT1::NC_090811.1:1242156-1244155(-)	TF_motif_seq_0262	IBOXCORE	1010	+	GAGAA	(Motif sequence only)
gene-ASAT1::NC_090811.1:1242156-1244155(-)	TF_motif_seq_0262	IBOXCORE	1019	-	TTATT	(Motif sequence only)
gene-ASAT1::NC_090811.1:1242156-1244155(-)	TF_motif_seq_0262	IBOXCORE	1032	-	TTATT	(Motif sequence only)
gene-ASAT1::NC_090811.1:1242156-1244155(-)	TF_motif_seq_0262	IBOXCORE	1039	+	GATAA	(Motif sequence only)
gene-ASAT1::NC_090811.1:1242156-1244155(-)	TF_motif_seq_0262	IBOXCORE	1051	-	TTGTC	(Motif sequence only)
gene-ASAT1::NC_090811.1:1242156-1244155(-)	TF_motif_seq_0262	IBOXCORE	1058	+	GCTAA	(Motif sequence only)
gene-ASAT1::NC_090811.1:1242156-1244155(-)	TF_motif_seq_0262	IBOXCORE	1111	+	GATAA	(Motif sequence only)
gene-ASAT1::NC_090811.1:1242156-1244155(-)	TF_motif_seq_0262	IBOXCORE	1124	+	GATAA	(Motif sequence only)
gene-ASAT1::NC_090811.1:1242156-1244155(-)	TF_motif_seq_0262	IBOXCORE	1126	-	TAATC	(Motif sequence only)
gene-ASAT1::NC_090811.1:1242156-1244155(-)	TF_motif_seq_0262	IBOXCORE	1131	-	TTATT	(Motif sequence only)
gene-ASAT1::NC_090811.1:1242156-1244155(-)	TF_motif_seq_0262	IBOXCORE	1134	-	TTATG	(Motif sequence only)
gene-ASAT1::NC_090811.1:1242156-1244155(-)	TF_motif_seq_0262	IBOXCORE	1144	+	GATAA	(Motif sequence only)
gene-ASAT1::NC_090811.1:1242156-1244155(-)	TF_motif_seq_0262	IBOXCORE	1150	-	TTATA	(Motif sequence only)
gene-ASAT1::NC_090811.1:1242156-1244155(-)	TF_motif_seq_0262	IBOXCORE	1171	+	CATAA	(Motif sequence only)
gene-ASAT1::NC_090811.1:1242156-1244155(-)	TF_motif_seq_0262	IBOXCORE	1177	+	GATAT	(Motif sequence only)
gene-ASAT1::NC_090811.1:1242156-1244155(-)	TF_motif_seq_0262	IBOXCORE	1194	+	GATCA	(Motif sequence only)
gene-ASAT1::NC_090811.1:1242156-1244155(-)	TF_motif_seq_0262	IBOXCORE	1197	+	CATAA	(Motif sequence only)
gene-ASAT1::NC_090811.1:1242156-1244155(-)	TF_motif_seq_0262	IBOXCORE	1208	+	GATAG	(Motif sequence only)
gene-ASAT1::NC_090811.1:1242156-1244155(-)	TF_motif_seq_0262	IBOXCORE	1220	+	GATCA	(Motif sequence only)
gene-ASAT1::NC_090811.1:1242156-1244155(-)	TF_motif_seq_0262	IBOXCORE	1233	-	TTCTC	(Motif sequence only)
gene-ASAT1::NC_090811.1:1242156-1244155(-)	TF_motif_seq_0262	IBOXCORE	1239	-	TAATC	(Motif sequence only)
gene-ASAT1::NC_090811.1:1242156-1244155(-)	TF_motif_seq_0262	IBOXCORE	1252	+	GTTAA	(Motif sequence only)
gene-ASAT1::NC_090811.1:1242156-1244155(-)	TF_motif_seq_0262	IBOXCORE	1281	-	TTATA	(Motif sequence only)
gene-ASAT1::NC_090811.1:1242156-1244155(-)	TF_motif_seq_0262	IBOXCORE	1282	+	TATAA	(Motif sequence only)
gene-ASAT1::NC_090811.1:1242156-1244155(-)	TF_motif_seq_0262	IBOXCORE	1299	+	GATTA	(Motif sequence only)
gene-ASAT1::NC_090811.1:1242156-1244155(-)	TF_motif_seq_0262	IBOXCORE	1301	-	TTATT	(Motif sequence only)
gene-ASAT1::NC_090811.1:1242156-1244155(-)	TF_motif_seq_0262	IBOXCORE	1311	-	TTTTC	(Motif sequence only)
gene-ASAT1::NC_090811.1:1242156-1244155(-)	TF_motif_seq_0262	IBOXCORE	1318	-	TTAGC	(Motif sequence only)
gene-ASAT1::NC_090811.1:1242156-1244155(-)	TF_motif_seq_0262	IBOXCORE	1341	-	TTATT	(Motif sequence only)
gene-ASAT1::NC_090811.1:1242156-1244155(-)	TF_motif_seq_0262	IBOXCORE	1351	-	TTAGC	(Motif sequence only)
gene-ASAT1::NC_090811.1:1242156-1244155(-)	TF_motif_seq_0262	IBOXCORE	1359	+	TATAA	(Motif sequence only)
gene-ASAT1::NC_090811.1:1242156-1244155(-)	TF_motif_seq_0262	IBOXCORE	1380	+	TATAA	(Motif sequence only)
gene-ASAT1::NC_090811.1:1242156-1244155(-)	TF_motif_seq_0262	IBOXCORE	1400	-	TTGTC	(Motif sequence only)
gene-ASAT1::NC_090811.1:1242156-1244155(-)	TF_motif_seq_0262	IBOXCORE	1407	-	TTATC	(Motif sequence only)
gene-ASAT1::NC_090811.1:1242156-1244155(-)	TF_motif_seq_0262	IBOXCORE	1423	+	AATAA	(Motif sequence only)
gene-ASAT1::NC_090811.1:1242156-1244155(-)	TF_motif_seq_0262	IBOXCORE	1446	+	GATAA	(Motif sequence only)
gene-ASAT1::NC_090811.1:1242156-1244155(-)	TF_motif_seq_0262	IBOXCORE	1457	+	GAAAA	(Motif sequence only)
gene-ASAT1::NC_090811.1:1242156-1244155(-)	TF_motif_seq_0262	IBOXCORE	1468	-	TTATT	(Motif sequence only)
gene-ASAT1::NC_090811.1:1242156-1244155(-)	TF_motif_seq_0262	IBOXCORE	1475	-	CTATC	(Motif sequence only)
gene-ASAT1::NC_090811.1:1242156-1244155(-)	TF_motif_seq_0262	IBOXCORE	1479	+	CATAA	(Motif sequence only)
gene-ASAT1::NC_090811.1:1242156-1244155(-)	TF_motif_seq_0262	IBOXCORE	1488	-	TTATC	(Motif sequence only)
gene-ASAT1::NC_090811.1:1242156-1244155(-)	TF_motif_seq_0262	IBOXCORE	1500	+	GATAT	(Motif sequence only)
gene-ASAT1::NC_090811.1:1242156-1244155(-)	TF_motif_seq_0262	IBOXCORE	1515	-	TTAAC	(Motif sequence only)
gene-ASAT1::NC_090811.1:1242156-1244155(-)	TF_motif_seq_0262	IBOXCORE	1533	-	TTTTC	(Motif sequence only)
gene-ASAT1::NC_090811.1:1242156-1244155(-)	TF_motif_seq_0262	IBOXCORE	1556	-	TAATC	(Motif sequence only)
gene-ASAT1::NC_090811.1:1242156-1244155(-)	TF_motif_seq_0262	IBOXCORE	1567	-	TTATA	(Motif sequence only)
gene-ASAT1::NC_090811.1:1242156-1244155(-)	TF_motif_seq_0262	IBOXCORE	1581	-	TTATA	(Motif sequence only)
gene-ASAT1::NC_090811.1:1242156-1244155(-)	TF_motif_seq_0262	IBOXCORE	1582	+	TATAA	(Motif sequence only)
gene-ASAT1::NC_090811.1:1242156-1244155(-)	TF_motif_seq_0262	IBOXCORE	1588	+	AATAA	(Motif sequence only)
gene-ASAT1::NC_090811.1:1242156-1244155(-)	TF_motif_seq_0262	IBOXCORE	1591	+	AATAA	(Motif sequence only)
gene-ASAT1::NC_090811.1:1242156-1244155(-)	TF_motif_seq_0262	IBOXCORE	1608	+	AATAA	(Motif sequence only)
gene-ASAT1::NC_090811.1:1242156-1244155(-)	TF_motif_seq_0262	IBOXCORE	1613	-	ATATC	(Motif sequence only)
gene-ASAT1::NC_090811.1:1242156-1244155(-)	TF_motif_seq_0262	IBOXCORE	1626	+	GATAA	(Motif sequence only)
gene-ASAT1::NC_090811.1:1242156-1244155(-)	TF_motif_seq_0262	IBOXCORE	1658	+	GATGA	(Motif sequence only)
gene-ASAT1::NC_090811.1:1242156-1244155(-)	TF_motif_seq_0262	IBOXCORE	1671	-	TCATC	(Motif sequence only)
gene-ASAT1::NC_090811.1:1242156-1244155(-)	TF_motif_seq_0262	IBOXCORE	1690	+	GAAAA	(Motif sequence only)
gene-ASAT1::NC_090811.1:1242156-1244155(-)	TF_motif_seq_0262	IBOXCORE	1712	-	TTATA	(Motif sequence only)
gene-ASAT1::NC_090811.1:1242156-1244155(-)	TF_motif_seq_0262	IBOXCORE	1713	+	TATAA	(Motif sequence only)
gene-ASAT1::NC_090811.1:1242156-1244155(-)	TF_motif_seq_0262	IBOXCORE	1718	+	CATAA	(Motif sequence only)
gene-ASAT1::NC_090811.1:1242156-1244155(-)	TF_motif_seq_0262	IBOXCORE	1783	+	GATAC	(Motif sequence only)
gene-ASAT1::NC_090811.1:1242156-1244155(-)	TF_motif_seq_0262	IBOXCORE	1791	-	TGATC	(Motif sequence only)
gene-ASAT1::NC_090811.1:1242156-1244155(-)	TF_motif_seq_0262	IBOXCORE	1792	+	GATCA	(Motif sequence only)
gene-ASAT1::NC_090811.1:1242156-1244155(-)	TF_motif_seq_0262	IBOXCORE	1806	+	GATAC	(Motif sequence only)
gene-ASAT1::NC_090811.1:1242156-1244155(-)	TF_motif_seq_0262	IBOXCORE	1813	+	GATAA	(Motif sequence only)
gene-ASAT1::NC_090811.1:1242156-1244155(-)	TF_motif_seq_0262	IBOXCORE	1820	-	CTATC	(Motif sequence only)
gene-ASAT1::NC_090811.1:1242156-1244155(-)	TF_motif_seq_0262	IBOXCORE	1854	-	TAATC	(Motif sequence only)
gene-ASAT1::NC_090811.1:1242156-1244155(-)	TF_motif_seq_0262	IBOXCORE	1871	-	TTTTC	(Motif sequence only)
gene-ASAT1::NC_090811.1:1242156-1244155(-)	TF_motif_seq_0262	IBOXCORE	1883	+	GATTA	(Motif sequence only)
gene-ASAT1::NC_090811.1:1242156-1244155(-)	TF_motif_seq_0262	IBOXCORE	1938	+	GATGA	(Motif sequence only)
gene-ASAT1::NC_090811.1:1242156-1244155(-)	TF_motif_seq_0262	IBOXCORE	1943	+	GTTAA	(Motif sequence only)
gene-ASAT1::NC_090811.1:1242156-1244155(-)	TF_motif_seq_0263	SORLIP1AT	30	-	GTGGA	(Motif sequence only)
gene-ASAT1::NC_090811.1:1242156-1244155(-)	TF_motif_seq_0263	SORLIP1AT	140	-	GTGTC	(Motif sequence only)
gene-ASAT1::NC_090811.1:1242156-1244155(-)	TF_motif_seq_0263	SORLIP1AT	357	+	TCCAC	(Motif sequence only)
gene-ASAT1::NC_090811.1:1242156-1244155(-)	TF_motif_seq_0263	SORLIP1AT	464	-	GTGGT	(Motif sequence only)
gene-ASAT1::NC_090811.1:1242156-1244155(-)	TF_motif_seq_0263	SORLIP1AT	483	+	GTCAC	(Motif sequence only)
gene-ASAT1::NC_090811.1:1242156-1244155(-)	TF_motif_seq_0263	SORLIP1AT	551	+	GCTAC	(Motif sequence only)
gene-ASAT1::NC_090811.1:1242156-1244155(-)	TF_motif_seq_0263	SORLIP1AT	567	+	ACCAC	(Motif sequence only)
gene-ASAT1::NC_090811.1:1242156-1244155(-)	TF_motif_seq_0263	SORLIP1AT	582	+	ACCAC	(Motif sequence only)
gene-ASAT1::NC_090811.1:1242156-1244155(-)	TF_motif_seq_0263	SORLIP1AT	630	-	GTTGC	(Motif sequence only)
gene-ASAT1::NC_090811.1:1242156-1244155(-)	TF_motif_seq_0263	SORLIP1AT	705	-	GTTGC	(Motif sequence only)
gene-ASAT1::NC_090811.1:1242156-1244155(-)	TF_motif_seq_0263	SORLIP1AT	758	+	GCCCC	(Motif sequence only)
gene-ASAT1::NC_090811.1:1242156-1244155(-)	TF_motif_seq_0263	SORLIP1AT	792	+	GTCAC	(Motif sequence only)
gene-ASAT1::NC_090811.1:1242156-1244155(-)	TF_motif_seq_0263	SORLIP1AT	1078	-	GCGGC	(Motif sequence only)
gene-ASAT1::NC_090811.1:1242156-1244155(-)	TF_motif_seq_0263	SORLIP1AT	1273	-	GTGGT	(Motif sequence only)
gene-ASAT1::NC_090811.1:1242156-1244155(-)	TF_motif_seq_0263	SORLIP1AT	1321	+	GCCAA	(Motif sequence only)
gene-ASAT1::NC_090811.1:1242156-1244155(-)	TF_motif_seq_0263	SORLIP1AT	1437	-	GTAGC	(Motif sequence only)
gene-ASAT1::NC_090811.1:1242156-1244155(-)	TF_motif_seq_0263	SORLIP1AT	1674	+	TCCAC	(Motif sequence only)
gene-ASAT1::NC_090811.1:1242156-1244155(-)	TF_motif_seq_0263	SORLIP1AT	1737	+	GACAC	(Motif sequence only)
gene-ASAT1::NC_090811.1:1242156-1244155(-)	TF_motif_seq_0263	SORLIP1AT	1823	+	TCCAC	(Motif sequence only)
gene-ASAT1::NC_090811.1:1242156-1244155(-)	TF_motif_seq_0263	SORLIP1AT	1889	+	GCCAT	(Motif sequence only)
gene-ASAT1::NC_090811.1:1242156-1244155(-)	TF_motif_seq_0263	SORLIP1AT	1909	+	GCCAA	(Motif sequence only)
gene-ASAT1::NC_090811.1:1242156-1244155(-)	TF_motif_seq_0263	SORLIP1AT	1950	-	GTGGC	(Motif sequence only)
gene-ASAT1::NC_090811.1:1242156-1244155(-)	TF_motif_seq_0264	MYBST1	23	-	TATTC	(Motif sequence only)
gene-ASAT1::NC_090811.1:1242156-1244155(-)	TF_motif_seq_0264	MYBST1	106	+	GAATA	(Motif sequence only)
gene-ASAT1::NC_090811.1:1242156-1244155(-)	TF_motif_seq_0264	MYBST1	122	-	TATCA	(Motif sequence only)
gene-ASAT1::NC_090811.1:1242156-1244155(-)	TF_motif_seq_0264	MYBST1	179	+	GCATA	(Motif sequence only)
gene-ASAT1::NC_090811.1:1242156-1244155(-)	TF_motif_seq_0264	MYBST1	185	-	TATCT	(Motif sequence only)
gene-ASAT1::NC_090811.1:1242156-1244155(-)	TF_motif_seq_0264	MYBST1	304	+	GAATA	(Motif sequence only)
gene-ASAT1::NC_090811.1:1242156-1244155(-)	TF_motif_seq_0264	MYBST1	319	-	TATCG	(Motif sequence only)
gene-ASAT1::NC_090811.1:1242156-1244155(-)	TF_motif_seq_0264	MYBST1	340	-	TATAC	(Motif sequence only)
gene-ASAT1::NC_090811.1:1242156-1244155(-)	TF_motif_seq_0264	MYBST1	355	-	GATCC	(Motif sequence only)
gene-ASAT1::NC_090811.1:1242156-1244155(-)	TF_motif_seq_0264	MYBST1	371	-	TATAC	(Motif sequence only)
gene-ASAT1::NC_090811.1:1242156-1244155(-)	TF_motif_seq_0264	MYBST1	413	-	TATCT	(Motif sequence only)
gene-ASAT1::NC_090811.1:1242156-1244155(-)	TF_motif_seq_0264	MYBST1	439	+	GTATA	(Motif sequence only)
gene-ASAT1::NC_090811.1:1242156-1244155(-)	TF_motif_seq_0264	MYBST1	466	+	GGTTA	(Motif sequence only)
gene-ASAT1::NC_090811.1:1242156-1244155(-)	TF_motif_seq_0264	MYBST1	496	-	AATCC	(Motif sequence only)
gene-ASAT1::NC_090811.1:1242156-1244155(-)	TF_motif_seq_0264	MYBST1	527	-	AATCC	(Motif sequence only)
gene-ASAT1::NC_090811.1:1242156-1244155(-)	TF_motif_seq_0264	MYBST1	576	+	TGATA	(Motif sequence only)
gene-ASAT1::NC_090811.1:1242156-1244155(-)	TF_motif_seq_0264	MYBST1	672	-	TATTC	(Motif sequence only)
gene-ASAT1::NC_090811.1:1242156-1244155(-)	TF_motif_seq_0264	MYBST1	696	+	GCATA	(Motif sequence only)
gene-ASAT1::NC_090811.1:1242156-1244155(-)	TF_motif_seq_0264	MYBST1	730	+	AGATA	(Motif sequence only)
gene-ASAT1::NC_090811.1:1242156-1244155(-)	TF_motif_seq_0264	MYBST1	740	+	GGAGA	(Motif sequence only)
gene-ASAT1::NC_090811.1:1242156-1244155(-)	TF_motif_seq_0264	MYBST1	809	-	TATCA	(Motif sequence only)
gene-ASAT1::NC_090811.1:1242156-1244155(-)	TF_motif_seq_0264	MYBST1	814	-	TATGC	(Motif sequence only)
gene-ASAT1::NC_090811.1:1242156-1244155(-)	TF_motif_seq_0264	MYBST1	840	-	TATTC	(Motif sequence only)
gene-ASAT1::NC_090811.1:1242156-1244155(-)	TF_motif_seq_0264	MYBST1	862	+	TGATA	(Motif sequence only)
gene-ASAT1::NC_090811.1:1242156-1244155(-)	TF_motif_seq_0264	MYBST1	980	+	AGATA	(Motif sequence only)
gene-ASAT1::NC_090811.1:1242156-1244155(-)	TF_motif_seq_0264	MYBST1	995	-	TATCG	(Motif sequence only)
gene-ASAT1::NC_090811.1:1242156-1244155(-)	TF_motif_seq_0264	MYBST1	1002	+	CGATA	(Motif sequence only)
gene-ASAT1::NC_090811.1:1242156-1244155(-)	TF_motif_seq_0264	MYBST1	1038	+	AGATA	(Motif sequence only)
gene-ASAT1::NC_090811.1:1242156-1244155(-)	TF_motif_seq_0264	MYBST1	1110	+	TGATA	(Motif sequence only)
gene-ASAT1::NC_090811.1:1242156-1244155(-)	TF_motif_seq_0264	MYBST1	1123	+	TGATA	(Motif sequence only)
gene-ASAT1::NC_090811.1:1242156-1244155(-)	TF_motif_seq_0264	MYBST1	1143	+	CGATA	(Motif sequence only)
gene-ASAT1::NC_090811.1:1242156-1244155(-)	TF_motif_seq_0264	MYBST1	1153	-	TATGC	(Motif sequence only)
gene-ASAT1::NC_090811.1:1242156-1244155(-)	TF_motif_seq_0264	MYBST1	1176	+	GGATA	(Motif sequence only)
gene-ASAT1::NC_090811.1:1242156-1244155(-)	TF_motif_seq_0264	MYBST1	1207	+	TGATA	(Motif sequence only)
gene-ASAT1::NC_090811.1:1242156-1244155(-)	TF_motif_seq_0264	MYBST1	1251	+	GGTTA	(Motif sequence only)
gene-ASAT1::NC_090811.1:1242156-1244155(-)	TF_motif_seq_0264	MYBST1	1260	+	GGGTA	(Motif sequence only)
gene-ASAT1::NC_090811.1:1242156-1244155(-)	TF_motif_seq_0264	MYBST1	1319	-	TAGCC	(Motif sequence only)
gene-ASAT1::NC_090811.1:1242156-1244155(-)	TF_motif_seq_0264	MYBST1	1339	+	GGTTA	(Motif sequence only)
gene-ASAT1::NC_090811.1:1242156-1244155(-)	TF_motif_seq_0264	MYBST1	1358	+	GTATA	(Motif sequence only)
gene-ASAT1::NC_090811.1:1242156-1244155(-)	TF_motif_seq_0264	MYBST1	1366	-	TGTCC	(Motif sequence only)
gene-ASAT1::NC_090811.1:1242156-1244155(-)	TF_motif_seq_0264	MYBST1	1388	-	TTTCC	(Motif sequence only)
gene-ASAT1::NC_090811.1:1242156-1244155(-)	TF_motif_seq_0264	MYBST1	1408	-	TATCT	(Motif sequence only)
gene-ASAT1::NC_090811.1:1242156-1244155(-)	TF_motif_seq_0264	MYBST1	1412	-	TACCC	(Motif sequence only)
gene-ASAT1::NC_090811.1:1242156-1244155(-)	TF_motif_seq_0264	MYBST1	1445	+	AGATA	(Motif sequence only)
gene-ASAT1::NC_090811.1:1242156-1244155(-)	TF_motif_seq_0264	MYBST1	1476	-	TATCA	(Motif sequence only)
gene-ASAT1::NC_090811.1:1242156-1244155(-)	TF_motif_seq_0264	MYBST1	1489	-	TATCG	(Motif sequence only)
gene-ASAT1::NC_090811.1:1242156-1244155(-)	TF_motif_seq_0264	MYBST1	1499	+	CGATA	(Motif sequence only)
gene-ASAT1::NC_090811.1:1242156-1244155(-)	TF_motif_seq_0264	MYBST1	1561	+	GTATA	(Motif sequence only)
gene-ASAT1::NC_090811.1:1242156-1244155(-)	TF_motif_seq_0264	MYBST1	1568	-	TATAC	(Motif sequence only)
gene-ASAT1::NC_090811.1:1242156-1244155(-)	TF_motif_seq_0264	MYBST1	1607	+	GAATA	(Motif sequence only)
gene-ASAT1::NC_090811.1:1242156-1244155(-)	TF_motif_seq_0264	MYBST1	1614	-	TATCG	(Motif sequence only)
gene-ASAT1::NC_090811.1:1242156-1244155(-)	TF_motif_seq_0264	MYBST1	1625	+	GGATA	(Motif sequence only)
gene-ASAT1::NC_090811.1:1242156-1244155(-)	TF_motif_seq_0264	MYBST1	1651	+	GCATA	(Motif sequence only)
gene-ASAT1::NC_090811.1:1242156-1244155(-)	TF_motif_seq_0264	MYBST1	1672	-	CATCC	(Motif sequence only)
gene-ASAT1::NC_090811.1:1242156-1244155(-)	TF_motif_seq_0264	MYBST1	1720	-	TAACC	(Motif sequence only)
gene-ASAT1::NC_090811.1:1242156-1244155(-)	TF_motif_seq_0264	MYBST1	1765	-	TATTC	(Motif sequence only)
gene-ASAT1::NC_090811.1:1242156-1244155(-)	TF_motif_seq_0264	MYBST1	1773	-	TATTC	(Motif sequence only)
gene-ASAT1::NC_090811.1:1242156-1244155(-)	TF_motif_seq_0264	MYBST1	1782	+	GGATA	(Motif sequence only)
gene-ASAT1::NC_090811.1:1242156-1244155(-)	TF_motif_seq_0264	MYBST1	1801	-	AATCC	(Motif sequence only)
gene-ASAT1::NC_090811.1:1242156-1244155(-)	TF_motif_seq_0264	MYBST1	1805	+	CGATA	(Motif sequence only)
gene-ASAT1::NC_090811.1:1242156-1244155(-)	TF_motif_seq_0264	MYBST1	1812	+	GGATA	(Motif sequence only)
gene-ASAT1::NC_090811.1:1242156-1244155(-)	TF_motif_seq_0264	MYBST1	1821	-	TATCC	(Motif sequence only)
gene-ASAT1::NC_090811.1:1242156-1244155(-)	TF_motif_seq_0264	MYBST1	1895	-	TATAC	(Motif sequence only)
gene-ASAT1::NC_090811.1:1242156-1244155(-)	TF_motif_seq_0264	MYBST1	1926	+	GTATA	(Motif sequence only)
gene-ASAT1::NC_090811.1:1242156-1244155(-)	TF_motif_seq_0264	MYBST1	1931	-	TATAC	(Motif sequence only)
gene-ASAT1::NC_090811.1:1242156-1244155(-)	TF_motif_seq_0265	SORLIP2AT	405	-	GACCC	(Motif sequence only)
gene-ASAT1::NC_090811.1:1242156-1244155(-)	TF_motif_seq_0265	SORLIP2AT	757	-	TGCCC	(Motif sequence only)
gene-ASAT1::NC_090811.1:1242156-1244155(-)	TF_motif_seq_0265	SORLIP2AT	758	-	GCCCC	(Motif sequence only)
gene-ASAT1::NC_090811.1:1242156-1244155(-)	TF_motif_seq_0265	SORLIP2AT	1079	+	CGGCC	(Motif sequence only)
gene-ASAT1::NC_090811.1:1242156-1244155(-)	TF_motif_seq_0265	SORLIP2AT	1080	+	GGCCC	(Motif sequence only)
gene-ASAT1::NC_090811.1:1242156-1244155(-)	TF_motif_seq_0265	SORLIP2AT	1080	-	GGCCC	(Motif sequence only)
gene-ASAT1::NC_090811.1:1242156-1244155(-)	TF_motif_seq_0265	SORLIP2AT	1367	-	GTCCC	(Motif sequence only)
gene-ASAT1::NC_090811.1:1242156-1244155(-)	TF_motif_seq_0265	SORLIP2AT	1887	+	AGGCC	(Motif sequence only)
gene-ASAT1::NC_090811.1:1242156-1244155(-)	TF_motif_seq_0265	SORLIP2AT	1888	-	GGCCA	(Motif sequence only)
gene-ASAT1::NC_090811.1:1242156-1244155(-)	TF_motif_seq_0268	ARR1AT	114	+	TGATT	(Motif sequence only)
gene-ASAT1::NC_090811.1:1242156-1244155(-)	TF_motif_seq_0268	ARR1AT	287	+	CGATT	(Motif sequence only)
gene-ASAT1::NC_090811.1:1242156-1244155(-)	TF_motif_seq_0268	ARR1AT	326	+	AGATT	(Motif sequence only)
gene-ASAT1::NC_090811.1:1242156-1244155(-)	TF_motif_seq_0268	ARR1AT	451	-	AATCT	(Motif sequence only)
gene-ASAT1::NC_090811.1:1242156-1244155(-)	TF_motif_seq_0268	ARR1AT	458	-	AATCT	(Motif sequence only)
gene-ASAT1::NC_090811.1:1242156-1244155(-)	TF_motif_seq_0268	ARR1AT	496	-	AATCC	(Motif sequence only)
gene-ASAT1::NC_090811.1:1242156-1244155(-)	TF_motif_seq_0268	ARR1AT	518	-	AATCT	(Motif sequence only)
gene-ASAT1::NC_090811.1:1242156-1244155(-)	TF_motif_seq_0268	ARR1AT	527	-	AATCC	(Motif sequence only)
gene-ASAT1::NC_090811.1:1242156-1244155(-)	TF_motif_seq_0268	ARR1AT	780	-	AATCA	(Motif sequence only)
gene-ASAT1::NC_090811.1:1242156-1244155(-)	TF_motif_seq_0268	ARR1AT	798	+	TGATT	(Motif sequence only)
gene-ASAT1::NC_090811.1:1242156-1244155(-)	TF_motif_seq_0268	ARR1AT	949	+	AGATT	(Motif sequence only)
gene-ASAT1::NC_090811.1:1242156-1244155(-)	TF_motif_seq_0268	ARR1AT	1127	-	AATCT	(Motif sequence only)
gene-ASAT1::NC_090811.1:1242156-1244155(-)	TF_motif_seq_0268	ARR1AT	1168	-	AATCA	(Motif sequence only)
gene-ASAT1::NC_090811.1:1242156-1244155(-)	TF_motif_seq_0268	ARR1AT	1190	-	AATCG	(Motif sequence only)
gene-ASAT1::NC_090811.1:1242156-1244155(-)	TF_motif_seq_0268	ARR1AT	1216	-	AATCG	(Motif sequence only)
gene-ASAT1::NC_090811.1:1242156-1244155(-)	TF_motif_seq_0268	ARR1AT	1240	-	AATCT	(Motif sequence only)
gene-ASAT1::NC_090811.1:1242156-1244155(-)	TF_motif_seq_0268	ARR1AT	1298	+	TGATT	(Motif sequence only)
gene-ASAT1::NC_090811.1:1242156-1244155(-)	TF_motif_seq_0268	ARR1AT	1557	-	AATCG	(Motif sequence only)
gene-ASAT1::NC_090811.1:1242156-1244155(-)	TF_motif_seq_0268	ARR1AT	1669	-	AATCA	(Motif sequence only)
gene-ASAT1::NC_090811.1:1242156-1244155(-)	TF_motif_seq_0268	ARR1AT	1801	-	AATCC	(Motif sequence only)
gene-ASAT1::NC_090811.1:1242156-1244155(-)	TF_motif_seq_0268	ARR1AT	1855	-	AATCA	(Motif sequence only)
gene-ASAT1::NC_090811.1:1242156-1244155(-)	TF_motif_seq_0268	ARR1AT	1882	+	AGATT	(Motif sequence only)
gene-ASAT1::NC_090811.1:1242156-1244155(-)	TF_motif_seq_0269	TAAAGSTKST1	3	-	ATTTA	(Motif sequence only)
gene-ASAT1::NC_090811.1:1242156-1244155(-)	TF_motif_seq_0269	TAAAGSTKST1	6	+	TAATG	(Motif sequence only)
gene-ASAT1::NC_090811.1:1242156-1244155(-)	TF_motif_seq_0269	TAAAGSTKST1	39	-	CTTCA	(Motif sequence only)
gene-ASAT1::NC_090811.1:1242156-1244155(-)	TF_motif_seq_0269	TAAAGSTKST1	41	+	TCAAG	(Motif sequence only)
gene-ASAT1::NC_090811.1:1242156-1244155(-)	TF_motif_seq_0269	TAAAGSTKST1	52	-	CTGTA	(Motif sequence only)
gene-ASAT1::NC_090811.1:1242156-1244155(-)	TF_motif_seq_0269	TAAAGSTKST1	73	+	TGAAG	(Motif sequence only)
gene-ASAT1::NC_090811.1:1242156-1244155(-)	TF_motif_seq_0269	TAAAGSTKST1	84	-	CTTTT	(Motif sequence only)
gene-ASAT1::NC_090811.1:1242156-1244155(-)	TF_motif_seq_0269	TAAAGSTKST1	100	-	ATTTA	(Motif sequence only)
gene-ASAT1::NC_090811.1:1242156-1244155(-)	TF_motif_seq_0269	TAAAGSTKST1	102	+	TTAAG	(Motif sequence only)
gene-ASAT1::NC_090811.1:1242156-1244155(-)	TF_motif_seq_0269	TAAAGSTKST1	148	-	TTTTA	(Motif sequence only)
gene-ASAT1::NC_090811.1:1242156-1244155(-)	TF_motif_seq_0269	TAAAGSTKST1	150	+	TTAAG	(Motif sequence only)
gene-ASAT1::NC_090811.1:1242156-1244155(-)	TF_motif_seq_0269	TAAAGSTKST1	164	-	CTTTA	(Motif sequence only)
gene-ASAT1::NC_090811.1:1242156-1244155(-)	TF_motif_seq_0269	TAAAGSTKST1	209	-	TTTTA	(Motif sequence only)
gene-ASAT1::NC_090811.1:1242156-1244155(-)	TF_motif_seq_0269	TAAAGSTKST1	214	-	CTTTT	(Motif sequence only)
gene-ASAT1::NC_090811.1:1242156-1244155(-)	TF_motif_seq_0269	TAAAGSTKST1	231	-	CTTAA	(Motif sequence only)
gene-ASAT1::NC_090811.1:1242156-1244155(-)	TF_motif_seq_0269	TAAAGSTKST1	233	+	TAAAT	(Motif sequence only)
gene-ASAT1::NC_090811.1:1242156-1244155(-)	TF_motif_seq_0269	TAAAGSTKST1	237	+	TAAAG	(Motif sequence only)
gene-ASAT1::NC_090811.1:1242156-1244155(-)	TF_motif_seq_0269	TAAAGSTKST1	241	+	GAAAG	(Motif sequence only)
gene-ASAT1::NC_090811.1:1242156-1244155(-)	TF_motif_seq_0269	TAAAGSTKST1	249	-	TTTTA	(Motif sequence only)
gene-ASAT1::NC_090811.1:1242156-1244155(-)	TF_motif_seq_0269	TAAAGSTKST1	269	-	CTTTA	(Motif sequence only)
gene-ASAT1::NC_090811.1:1242156-1244155(-)	TF_motif_seq_0269	TAAAGSTKST1	274	-	GTTTA	(Motif sequence only)
gene-ASAT1::NC_090811.1:1242156-1244155(-)	TF_motif_seq_0269	TAAAGSTKST1	291	+	TAAAG	(Motif sequence only)
gene-ASAT1::NC_090811.1:1242156-1244155(-)	TF_motif_seq_0269	TAAAGSTKST1	313	+	TAAAA	(Motif sequence only)
gene-ASAT1::NC_090811.1:1242156-1244155(-)	TF_motif_seq_0269	TAAAGSTKST1	328	-	ATTTA	(Motif sequence only)
gene-ASAT1::NC_090811.1:1242156-1244155(-)	TF_motif_seq_0269	TAAAGSTKST1	330	+	TTAAG	(Motif sequence only)
gene-ASAT1::NC_090811.1:1242156-1244155(-)	TF_motif_seq_0269	TAAAGSTKST1	335	-	CTTTA	(Motif sequence only)
gene-ASAT1::NC_090811.1:1242156-1244155(-)	TF_motif_seq_0269	TAAAGSTKST1	348	+	CAAAG	(Motif sequence only)
gene-ASAT1::NC_090811.1:1242156-1244155(-)	TF_motif_seq_0269	TAAAGSTKST1	370	-	CTATA	(Motif sequence only)
gene-ASAT1::NC_090811.1:1242156-1244155(-)	TF_motif_seq_0269	TAAAGSTKST1	395	-	CTTTG	(Motif sequence only)
gene-ASAT1::NC_090811.1:1242156-1244155(-)	TF_motif_seq_0269	TAAAGSTKST1	409	-	CTTTT	(Motif sequence only)
gene-ASAT1::NC_090811.1:1242156-1244155(-)	TF_motif_seq_0269	TAAAGSTKST1	410	-	TTTTA	(Motif sequence only)
gene-ASAT1::NC_090811.1:1242156-1244155(-)	TF_motif_seq_0269	TAAAGSTKST1	432	+	TAAAT	(Motif sequence only)
gene-ASAT1::NC_090811.1:1242156-1244155(-)	TF_motif_seq_0269	TAAAGSTKST1	442	+	TAAAT	(Motif sequence only)
gene-ASAT1::NC_090811.1:1242156-1244155(-)	TF_motif_seq_0269	TAAAGSTKST1	449	+	TAAAT	(Motif sequence only)
gene-ASAT1::NC_090811.1:1242156-1244155(-)	TF_motif_seq_0269	TAAAGSTKST1	454	-	CTTGA	(Motif sequence only)
gene-ASAT1::NC_090811.1:1242156-1244155(-)	TF_motif_seq_0269	TAAAGSTKST1	488	+	TAAAA	(Motif sequence only)
gene-ASAT1::NC_090811.1:1242156-1244155(-)	TF_motif_seq_0269	TAAAGSTKST1	509	+	TAAAG	(Motif sequence only)
gene-ASAT1::NC_090811.1:1242156-1244155(-)	TF_motif_seq_0269	TAAAGSTKST1	521	-	CTTGA	(Motif sequence only)
gene-ASAT1::NC_090811.1:1242156-1244155(-)	TF_motif_seq_0269	TAAAGSTKST1	560	-	CTTTT	(Motif sequence only)
gene-ASAT1::NC_090811.1:1242156-1244155(-)	TF_motif_seq_0269	TAAAGSTKST1	579	+	TAAAC	(Motif sequence only)
gene-ASAT1::NC_090811.1:1242156-1244155(-)	TF_motif_seq_0269	TAAAGSTKST1	597	-	CTTTC	(Motif sequence only)
gene-ASAT1::NC_090811.1:1242156-1244155(-)	TF_motif_seq_0269	TAAAGSTKST1	609	+	CAAAG	(Motif sequence only)
gene-ASAT1::NC_090811.1:1242156-1244155(-)	TF_motif_seq_0269	TAAAGSTKST1	615	+	TAAAC	(Motif sequence only)
gene-ASAT1::NC_090811.1:1242156-1244155(-)	TF_motif_seq_0269	TAAAGSTKST1	716	-	GTTTA	(Motif sequence only)
gene-ASAT1::NC_090811.1:1242156-1244155(-)	TF_motif_seq_0269	TAAAGSTKST1	718	+	TTAAG	(Motif sequence only)
gene-ASAT1::NC_090811.1:1242156-1244155(-)	TF_motif_seq_0269	TAAAGSTKST1	727	+	AAAAG	(Motif sequence only)
gene-ASAT1::NC_090811.1:1242156-1244155(-)	TF_motif_seq_0269	TAAAGSTKST1	796	-	CTTGA	(Motif sequence only)
gene-ASAT1::NC_090811.1:1242156-1244155(-)	TF_motif_seq_0269	TAAAGSTKST1	818	-	CTTTT	(Motif sequence only)
gene-ASAT1::NC_090811.1:1242156-1244155(-)	TF_motif_seq_0269	TAAAGSTKST1	819	-	TTTTA	(Motif sequence only)
gene-ASAT1::NC_090811.1:1242156-1244155(-)	TF_motif_seq_0269	TAAAGSTKST1	826	-	TTTTA	(Motif sequence only)
gene-ASAT1::NC_090811.1:1242156-1244155(-)	TF_motif_seq_0269	TAAAGSTKST1	828	+	TTAAG	(Motif sequence only)
gene-ASAT1::NC_090811.1:1242156-1244155(-)	TF_motif_seq_0269	TAAAGSTKST1	837	-	GTTTA	(Motif sequence only)
gene-ASAT1::NC_090811.1:1242156-1244155(-)	TF_motif_seq_0269	TAAAGSTKST1	846	+	AAAAG	(Motif sequence only)
gene-ASAT1::NC_090811.1:1242156-1244155(-)	TF_motif_seq_0269	TAAAGSTKST1	872	-	TTTTA	(Motif sequence only)
gene-ASAT1::NC_090811.1:1242156-1244155(-)	TF_motif_seq_0269	TAAAGSTKST1	875	+	TAAAA	(Motif sequence only)
gene-ASAT1::NC_090811.1:1242156-1244155(-)	TF_motif_seq_0269	TAAAGSTKST1	957	-	CTTTT	(Motif sequence only)
gene-ASAT1::NC_090811.1:1242156-1244155(-)	TF_motif_seq_0269	TAAAGSTKST1	959	-	TTTTA	(Motif sequence only)
gene-ASAT1::NC_090811.1:1242156-1244155(-)	TF_motif_seq_0269	TAAAGSTKST1	976	-	TTTTA	(Motif sequence only)
gene-ASAT1::NC_090811.1:1242156-1244155(-)	TF_motif_seq_0269	TAAAGSTKST1	992	-	CTTTA	(Motif sequence only)
gene-ASAT1::NC_090811.1:1242156-1244155(-)	TF_motif_seq_0269	TAAAGSTKST1	1017	-	CTTTA	(Motif sequence only)
gene-ASAT1::NC_090811.1:1242156-1244155(-)	TF_motif_seq_0269	TAAAGSTKST1	1030	-	CATTA	(Motif sequence only)
gene-ASAT1::NC_090811.1:1242156-1244155(-)	TF_motif_seq_0269	TAAAGSTKST1	1041	+	TAATG	(Motif sequence only)
gene-ASAT1::NC_090811.1:1242156-1244155(-)	TF_motif_seq_0269	TAAAGSTKST1	1072	-	TTTTA	(Motif sequence only)
gene-ASAT1::NC_090811.1:1242156-1244155(-)	TF_motif_seq_0269	TAAAGSTKST1	1092	+	TATAG	(Motif sequence only)
gene-ASAT1::NC_090811.1:1242156-1244155(-)	TF_motif_seq_0269	TAAAGSTKST1	1096	+	GAAAG	(Motif sequence only)
gene-ASAT1::NC_090811.1:1242156-1244155(-)	TF_motif_seq_0269	TAAAGSTKST1	1113	+	TAAAA	(Motif sequence only)
gene-ASAT1::NC_090811.1:1242156-1244155(-)	TF_motif_seq_0269	TAAAGSTKST1	1137	+	TGAAG	(Motif sequence only)
gene-ASAT1::NC_090811.1:1242156-1244155(-)	TF_motif_seq_0269	TAAAGSTKST1	1146	+	TAAAT	(Motif sequence only)
gene-ASAT1::NC_090811.1:1242156-1244155(-)	TF_motif_seq_0269	TAAAGSTKST1	1157	-	CTTTT	(Motif sequence only)
gene-ASAT1::NC_090811.1:1242156-1244155(-)	TF_motif_seq_0269	TAAAGSTKST1	1159	-	TTTTA	(Motif sequence only)
gene-ASAT1::NC_090811.1:1242156-1244155(-)	TF_motif_seq_0269	TAAAGSTKST1	1173	+	TAAGG	(Motif sequence only)
gene-ASAT1::NC_090811.1:1242156-1244155(-)	TF_motif_seq_0269	TAAAGSTKST1	1199	+	TAAAG	(Motif sequence only)
gene-ASAT1::NC_090811.1:1242156-1244155(-)	TF_motif_seq_0269	TAAAGSTKST1	1254	+	TAAAA	(Motif sequence only)
gene-ASAT1::NC_090811.1:1242156-1244155(-)	TF_motif_seq_0269	TAAAGSTKST1	1256	+	AAAAG	(Motif sequence only)
gene-ASAT1::NC_090811.1:1242156-1244155(-)	TF_motif_seq_0269	TAAAGSTKST1	1279	-	ATTTA	(Motif sequence only)
gene-ASAT1::NC_090811.1:1242156-1244155(-)	TF_motif_seq_0269	TAAAGSTKST1	1284	+	TAAAA	(Motif sequence only)
gene-ASAT1::NC_090811.1:1242156-1244155(-)	TF_motif_seq_0269	TAAAGSTKST1	1288	+	AAAAG	(Motif sequence only)
gene-ASAT1::NC_090811.1:1242156-1244155(-)	TF_motif_seq_0269	TAAAGSTKST1	1305	-	TTTTA	(Motif sequence only)
gene-ASAT1::NC_090811.1:1242156-1244155(-)	TF_motif_seq_0269	TAAAGSTKST1	1315	-	CTTTT	(Motif sequence only)
gene-ASAT1::NC_090811.1:1242156-1244155(-)	TF_motif_seq_0269	TAAAGSTKST1	1316	-	TTTTA	(Motif sequence only)
gene-ASAT1::NC_090811.1:1242156-1244155(-)	TF_motif_seq_0269	TAAAGSTKST1	1343	-	ATTTA	(Motif sequence only)
gene-ASAT1::NC_090811.1:1242156-1244155(-)	TF_motif_seq_0269	TAAAGSTKST1	1349	-	TTTTA	(Motif sequence only)
gene-ASAT1::NC_090811.1:1242156-1244155(-)	TF_motif_seq_0269	TAAAGSTKST1	1379	-	CTATA	(Motif sequence only)
gene-ASAT1::NC_090811.1:1242156-1244155(-)	TF_motif_seq_0269	TAAAGSTKST1	1387	-	CTTTC	(Motif sequence only)
gene-ASAT1::NC_090811.1:1242156-1244155(-)	TF_motif_seq_0269	TAAAGSTKST1	1404	-	CTTTT	(Motif sequence only)
gene-ASAT1::NC_090811.1:1242156-1244155(-)	TF_motif_seq_0269	TAAAGSTKST1	1405	-	TTTTA	(Motif sequence only)
gene-ASAT1::NC_090811.1:1242156-1244155(-)	TF_motif_seq_0269	TAAAGSTKST1	1419	-	CTTAA	(Motif sequence only)
gene-ASAT1::NC_090811.1:1242156-1244155(-)	TF_motif_seq_0269	TAAAGSTKST1	1421	+	TAAAT	(Motif sequence only)
gene-ASAT1::NC_090811.1:1242156-1244155(-)	TF_motif_seq_0269	TAAAGSTKST1	1425	+	TAAAT	(Motif sequence only)
gene-ASAT1::NC_090811.1:1242156-1244155(-)	TF_motif_seq_0269	TAAAGSTKST1	1441	-	CTTTA	(Motif sequence only)
gene-ASAT1::NC_090811.1:1242156-1244155(-)	TF_motif_seq_0269	TAAAGSTKST1	1460	+	AAAAG	(Motif sequence only)
gene-ASAT1::NC_090811.1:1242156-1244155(-)	TF_motif_seq_0269	TAAAGSTKST1	1486	-	ATTTA	(Motif sequence only)
gene-ASAT1::NC_090811.1:1242156-1244155(-)	TF_motif_seq_0269	TAAAGSTKST1	1503	-	ATTTA	(Motif sequence only)
gene-ASAT1::NC_090811.1:1242156-1244155(-)	TF_motif_seq_0269	TAAAGSTKST1	1516	+	TAACG	(Motif sequence only)
gene-ASAT1::NC_090811.1:1242156-1244155(-)	TF_motif_seq_0269	TAAAGSTKST1	1537	-	CATTA	(Motif sequence only)
gene-ASAT1::NC_090811.1:1242156-1244155(-)	TF_motif_seq_0269	TAAAGSTKST1	1540	+	TAATG	(Motif sequence only)
gene-ASAT1::NC_090811.1:1242156-1244155(-)	TF_motif_seq_0269	TAAAGSTKST1	1553	-	ATTTA	(Motif sequence only)
gene-ASAT1::NC_090811.1:1242156-1244155(-)	TF_motif_seq_0269	TAAAGSTKST1	1562	+	TATAG	(Motif sequence only)
gene-ASAT1::NC_090811.1:1242156-1244155(-)	TF_motif_seq_0269	TAAAGSTKST1	1572	-	CTTAA	(Motif sequence only)
gene-ASAT1::NC_090811.1:1242156-1244155(-)	TF_motif_seq_0269	TAAAGSTKST1	1574	+	TAAAT	(Motif sequence only)
gene-ASAT1::NC_090811.1:1242156-1244155(-)	TF_motif_seq_0269	TAAAGSTKST1	1579	-	ATTTA	(Motif sequence only)
gene-ASAT1::NC_090811.1:1242156-1244155(-)	TF_motif_seq_0269	TAAAGSTKST1	1593	+	TAAAC	(Motif sequence only)
gene-ASAT1::NC_090811.1:1242156-1244155(-)	TF_motif_seq_0269	TAAAGSTKST1	1610	+	TAAAT	(Motif sequence only)
gene-ASAT1::NC_090811.1:1242156-1244155(-)	TF_motif_seq_0269	TAAAGSTKST1	1628	+	TAAAA	(Motif sequence only)
gene-ASAT1::NC_090811.1:1242156-1244155(-)	TF_motif_seq_0269	TAAAGSTKST1	1631	+	AAAAG	(Motif sequence only)
gene-ASAT1::NC_090811.1:1242156-1244155(-)	TF_motif_seq_0269	TAAAGSTKST1	1640	+	AAAAG	(Motif sequence only)
gene-ASAT1::NC_090811.1:1242156-1244155(-)	TF_motif_seq_0269	TAAAGSTKST1	1647	-	CTTTG	(Motif sequence only)
gene-ASAT1::NC_090811.1:1242156-1244155(-)	TF_motif_seq_0269	TAAAGSTKST1	1654	+	TAGAG	(Motif sequence only)
gene-ASAT1::NC_090811.1:1242156-1244155(-)	TF_motif_seq_0269	TAAAGSTKST1	1660	+	TGAAG	(Motif sequence only)
gene-ASAT1::NC_090811.1:1242156-1244155(-)	TF_motif_seq_0269	TAAAGSTKST1	1701	-	CTTTG	(Motif sequence only)
gene-ASAT1::NC_090811.1:1242156-1244155(-)	TF_motif_seq_0269	TAAAGSTKST1	1710	-	CATTA	(Motif sequence only)
gene-ASAT1::NC_090811.1:1242156-1244155(-)	TF_motif_seq_0269	TAAAGSTKST1	1728	-	CTCTA	(Motif sequence only)
gene-ASAT1::NC_090811.1:1242156-1244155(-)	TF_motif_seq_0269	TAAAGSTKST1	1730	-	CTATA	(Motif sequence only)
gene-ASAT1::NC_090811.1:1242156-1244155(-)	TF_motif_seq_0269	TAAAGSTKST1	1818	-	CTCTA	(Motif sequence only)
gene-ASAT1::NC_090811.1:1242156-1244155(-)	TF_motif_seq_0269	TAAAGSTKST1	1837	-	CTTGA	(Motif sequence only)
gene-ASAT1::NC_090811.1:1242156-1244155(-)	TF_motif_seq_0269	TAAAGSTKST1	1869	-	CTTTT	(Motif sequence only)
gene-ASAT1::NC_090811.1:1242156-1244155(-)	TF_motif_seq_0269	TAAAGSTKST1	1878	-	CTATA	(Motif sequence only)
gene-ASAT1::NC_090811.1:1242156-1244155(-)	TF_motif_seq_0269	TAAAGSTKST1	1879	+	TATAG	(Motif sequence only)
gene-ASAT1::NC_090811.1:1242156-1244155(-)	TF_motif_seq_0269	TAAAGSTKST1	1900	-	CTCTA	(Motif sequence only)
gene-ASAT1::NC_090811.1:1242156-1244155(-)	TF_motif_seq_0269	TAAAGSTKST1	1917	+	TCAAG	(Motif sequence only)
gene-ASAT1::NC_090811.1:1242156-1244155(-)	TF_motif_seq_0269	TAAAGSTKST1	1945	+	TAAAA	(Motif sequence only)
gene-ASAT1::NC_090811.1:1242156-1244155(-)	TF_motif_seq_0269	TAAAGSTKST1	1946	+	AAAAG	(Motif sequence only)
gene-ASAT1::NC_090811.1:1242156-1244155(-)	TF_motif_seq_0269	TAAAGSTKST1	1963	+	TAAAC	(Motif sequence only)
gene-ASAT1::NC_090811.1:1242156-1244155(-)	TF_motif_seq_0272	WBOXHVISO1	46	-	AGACA	(Motif sequence only)
gene-ASAT1::NC_090811.1:1242156-1244155(-)	TF_motif_seq_0272	WBOXHVISO1	65	+	TTACT	(Motif sequence only)
gene-ASAT1::NC_090811.1:1242156-1244155(-)	TF_motif_seq_0272	WBOXHVISO1	81	+	TGTCT	(Motif sequence only)
gene-ASAT1::NC_090811.1:1242156-1244155(-)	TF_motif_seq_0272	WBOXHVISO1	110	+	AGACT	(Motif sequence only)
gene-ASAT1::NC_090811.1:1242156-1244155(-)	TF_motif_seq_0272	WBOXHVISO1	114	+	TGATT	(Motif sequence only)
gene-ASAT1::NC_090811.1:1242156-1244155(-)	TF_motif_seq_0272	WBOXHVISO1	117	+	TTACT	(Motif sequence only)
gene-ASAT1::NC_090811.1:1242156-1244155(-)	TF_motif_seq_0272	WBOXHVISO1	124	+	TCACT	(Motif sequence only)
gene-ASAT1::NC_090811.1:1242156-1244155(-)	TF_motif_seq_0272	WBOXHVISO1	141	-	TGTCA	(Motif sequence only)
gene-ASAT1::NC_090811.1:1242156-1244155(-)	TF_motif_seq_0272	WBOXHVISO1	153	+	AGACT	(Motif sequence only)
gene-ASAT1::NC_090811.1:1242156-1244155(-)	TF_motif_seq_0272	WBOXHVISO1	211	+	TTACT	(Motif sequence only)
gene-ASAT1::NC_090811.1:1242156-1244155(-)	TF_motif_seq_0272	WBOXHVISO1	223	+	TCACT	(Motif sequence only)
gene-ASAT1::NC_090811.1:1242156-1244155(-)	TF_motif_seq_0272	WBOXHVISO1	261	+	TGACA	(Motif sequence only)
gene-ASAT1::NC_090811.1:1242156-1244155(-)	TF_motif_seq_0272	WBOXHVISO1	303	+	TGAAT	(Motif sequence only)
gene-ASAT1::NC_090811.1:1242156-1244155(-)	TF_motif_seq_0272	WBOXHVISO1	345	+	TGACA	(Motif sequence only)
gene-ASAT1::NC_090811.1:1242156-1244155(-)	TF_motif_seq_0272	WBOXHVISO1	386	-	ACTCA	(Motif sequence only)
gene-ASAT1::NC_090811.1:1242156-1244155(-)	TF_motif_seq_0272	WBOXHVISO1	404	+	TGACC	(Motif sequence only)
gene-ASAT1::NC_090811.1:1242156-1244155(-)	TF_motif_seq_0272	WBOXHVISO1	428	+	TCACT	(Motif sequence only)
gene-ASAT1::NC_090811.1:1242156-1244155(-)	TF_motif_seq_0272	WBOXHVISO1	456	+	TGAAT	(Motif sequence only)
gene-ASAT1::NC_090811.1:1242156-1244155(-)	TF_motif_seq_0272	WBOXHVISO1	482	-	GGTCA	(Motif sequence only)
gene-ASAT1::NC_090811.1:1242156-1244155(-)	TF_motif_seq_0272	WBOXHVISO1	484	+	TCACT	(Motif sequence only)
gene-ASAT1::NC_090811.1:1242156-1244155(-)	TF_motif_seq_0272	WBOXHVISO1	504	-	ATTCA	(Motif sequence only)
gene-ASAT1::NC_090811.1:1242156-1244155(-)	TF_motif_seq_0272	WBOXHVISO1	543	-	ATTCA	(Motif sequence only)
gene-ASAT1::NC_090811.1:1242156-1244155(-)	TF_motif_seq_0272	WBOXHVISO1	557	+	TAACT	(Motif sequence only)
gene-ASAT1::NC_090811.1:1242156-1244155(-)	TF_motif_seq_0272	WBOXHVISO1	570	-	ACTCA	(Motif sequence only)
gene-ASAT1::NC_090811.1:1242156-1244155(-)	TF_motif_seq_0272	WBOXHVISO1	574	-	AGTGA	(Motif sequence only)
gene-ASAT1::NC_090811.1:1242156-1244155(-)	TF_motif_seq_0272	WBOXHVISO1	621	+	AGACT	(Motif sequence only)
gene-ASAT1::NC_090811.1:1242156-1244155(-)	TF_motif_seq_0272	WBOXHVISO1	653	-	AGTGA	(Motif sequence only)
gene-ASAT1::NC_090811.1:1242156-1244155(-)	TF_motif_seq_0272	WBOXHVISO1	655	+	TGAAT	(Motif sequence only)
gene-ASAT1::NC_090811.1:1242156-1244155(-)	TF_motif_seq_0272	WBOXHVISO1	673	-	ATTCA	(Motif sequence only)
gene-ASAT1::NC_090811.1:1242156-1244155(-)	TF_motif_seq_0272	WBOXHVISO1	723	-	AGACA	(Motif sequence only)
gene-ASAT1::NC_090811.1:1242156-1244155(-)	TF_motif_seq_0272	WBOXHVISO1	780	-	AATCA	(Motif sequence only)
gene-ASAT1::NC_090811.1:1242156-1244155(-)	TF_motif_seq_0272	WBOXHVISO1	791	-	TGTCA	(Motif sequence only)
gene-ASAT1::NC_090811.1:1242156-1244155(-)	TF_motif_seq_0272	WBOXHVISO1	793	+	TCACT	(Motif sequence only)
gene-ASAT1::NC_090811.1:1242156-1244155(-)	TF_motif_seq_0272	WBOXHVISO1	798	+	TGATT	(Motif sequence only)
gene-ASAT1::NC_090811.1:1242156-1244155(-)	TF_motif_seq_0272	WBOXHVISO1	841	-	ATTCA	(Motif sequence only)
gene-ASAT1::NC_090811.1:1242156-1244155(-)	TF_motif_seq_0272	WBOXHVISO1	898	+	TGAAT	(Motif sequence only)
gene-ASAT1::NC_090811.1:1242156-1244155(-)	TF_motif_seq_0272	WBOXHVISO1	916	+	TGAGT	(Motif sequence only)
gene-ASAT1::NC_090811.1:1242156-1244155(-)	TF_motif_seq_0272	WBOXHVISO1	918	-	AGTAA	(Motif sequence only)
gene-ASAT1::NC_090811.1:1242156-1244155(-)	TF_motif_seq_0272	WBOXHVISO1	920	+	TAACT	(Motif sequence only)
gene-ASAT1::NC_090811.1:1242156-1244155(-)	TF_motif_seq_0272	WBOXHVISO1	961	+	TTACT	(Motif sequence only)
gene-ASAT1::NC_090811.1:1242156-1244155(-)	TF_motif_seq_0272	WBOXHVISO1	1140	-	AGTCG	(Motif sequence only)
gene-ASAT1::NC_090811.1:1242156-1244155(-)	TF_motif_seq_0272	WBOXHVISO1	1166	+	TGAAT	(Motif sequence only)
gene-ASAT1::NC_090811.1:1242156-1244155(-)	TF_motif_seq_0272	WBOXHVISO1	1168	-	AATCA	(Motif sequence only)
gene-ASAT1::NC_090811.1:1242156-1244155(-)	TF_motif_seq_0272	WBOXHVISO1	1181	-	TGTCA	(Motif sequence only)
gene-ASAT1::NC_090811.1:1242156-1244155(-)	TF_motif_seq_0272	WBOXHVISO1	1244	+	TTACT	(Motif sequence only)
gene-ASAT1::NC_090811.1:1242156-1244155(-)	TF_motif_seq_0272	WBOXHVISO1	1275	-	GGTCA	(Motif sequence only)
gene-ASAT1::NC_090811.1:1242156-1244155(-)	TF_motif_seq_0272	WBOXHVISO1	1291	+	AGACT	(Motif sequence only)
gene-ASAT1::NC_090811.1:1242156-1244155(-)	TF_motif_seq_0272	WBOXHVISO1	1296	-	AGTGA	(Motif sequence only)
gene-ASAT1::NC_090811.1:1242156-1244155(-)	TF_motif_seq_0272	WBOXHVISO1	1298	+	TGATT	(Motif sequence only)
gene-ASAT1::NC_090811.1:1242156-1244155(-)	TF_motif_seq_0272	WBOXHVISO1	1320	-	AGCCA	(Motif sequence only)
gene-ASAT1::NC_090811.1:1242156-1244155(-)	TF_motif_seq_0272	WBOXHVISO1	1401	+	TGTCT	(Motif sequence only)
gene-ASAT1::NC_090811.1:1242156-1244155(-)	TF_motif_seq_0272	WBOXHVISO1	1466	-	AGTTA	(Motif sequence only)
gene-ASAT1::NC_090811.1:1242156-1244155(-)	TF_motif_seq_0272	WBOXHVISO1	1522	-	ATTCA	(Motif sequence only)
gene-ASAT1::NC_090811.1:1242156-1244155(-)	TF_motif_seq_0272	WBOXHVISO1	1565	-	AGTTA	(Motif sequence only)
gene-ASAT1::NC_090811.1:1242156-1244155(-)	TF_motif_seq_0272	WBOXHVISO1	1598	-	ACTCA	(Motif sequence only)
gene-ASAT1::NC_090811.1:1242156-1244155(-)	TF_motif_seq_0272	WBOXHVISO1	1606	+	TGAAT	(Motif sequence only)
gene-ASAT1::NC_090811.1:1242156-1244155(-)	TF_motif_seq_0272	WBOXHVISO1	1644	+	GGACT	(Motif sequence only)
gene-ASAT1::NC_090811.1:1242156-1244155(-)	TF_motif_seq_0272	WBOXHVISO1	1669	-	AATCA	(Motif sequence only)
gene-ASAT1::NC_090811.1:1242156-1244155(-)	TF_motif_seq_0272	WBOXHVISO1	1736	+	TGACA	(Motif sequence only)
gene-ASAT1::NC_090811.1:1242156-1244155(-)	TF_motif_seq_0272	WBOXHVISO1	1761	+	CGACT	(Motif sequence only)
gene-ASAT1::NC_090811.1:1242156-1244155(-)	TF_motif_seq_0272	WBOXHVISO1	1769	+	CGACT	(Motif sequence only)
gene-ASAT1::NC_090811.1:1242156-1244155(-)	TF_motif_seq_0272	WBOXHVISO1	1815	+	TAACT	(Motif sequence only)
gene-ASAT1::NC_090811.1:1242156-1244155(-)	TF_motif_seq_0272	WBOXHVISO1	1830	-	AGTCG	(Motif sequence only)
gene-ASAT1::NC_090811.1:1242156-1244155(-)	TF_motif_seq_0272	WBOXHVISO1	1839	+	TGACG	(Motif sequence only)
gene-ASAT1::NC_090811.1:1242156-1244155(-)	TF_motif_seq_0272	WBOXHVISO1	1855	-	AATCA	(Motif sequence only)
gene-ASAT1::NC_090811.1:1242156-1244155(-)	TF_motif_seq_0272	WBOXHVISO1	1920	+	AGACT	(Motif sequence only)
gene-ASAT1::NC_090811.1:1242156-1244155(-)	TF_motif_seq_0272	WBOXHVISO1	1940	+	TGAGT	(Motif sequence only)
gene-ASAT1::NC_090811.1:1242156-1244155(-)	TF_motif_seq_0272	WBOXHVISO1	1942	-	AGTTA	(Motif sequence only)
gene-ASAT1::NC_090811.1:1242156-1244155(-)	TF_motif_seq_0272	WBOXHVISO1	1985	-	ATTCA	(Motif sequence only)
gene-ASAT1::NC_090811.1:1242156-1244155(-)	TF_motif_seq_0272	WBOXHVISO1	1989	-	ATTCA	(Motif sequence only)
gene-ASAT1::NC_090811.1:1242156-1244155(-)	TF_motif_seq_0273	WBOXNTERF3	404	+	TGACC	(Motif sequence only)
gene-ASAT1::NC_090811.1:1242156-1244155(-)	TF_motif_seq_0273	WBOXNTERF3	482	-	GGTCA	(Motif sequence only)
gene-ASAT1::NC_090811.1:1242156-1244155(-)	TF_motif_seq_0273	WBOXNTERF3	1275	-	GGTCA	(Motif sequence only)
gene-ASAT1::NC_090811.1:1242156-1244155(-)	TF_motif_seq_0274	BIHD1OS	20	+	TGTTA	(Motif sequence only)
gene-ASAT1::NC_090811.1:1242156-1244155(-)	TF_motif_seq_0274	BIHD1OS	46	-	AGACA	(Motif sequence only)
gene-ASAT1::NC_090811.1:1242156-1244155(-)	TF_motif_seq_0274	BIHD1OS	63	+	TGTTA	(Motif sequence only)
gene-ASAT1::NC_090811.1:1242156-1244155(-)	TF_motif_seq_0274	BIHD1OS	81	+	TGTCT	(Motif sequence only)
gene-ASAT1::NC_090811.1:1242156-1244155(-)	TF_motif_seq_0274	BIHD1OS	122	+	TATCA	(Motif sequence only)
gene-ASAT1::NC_090811.1:1242156-1244155(-)	TF_motif_seq_0274	BIHD1OS	141	+	TGTCA	(Motif sequence only)
gene-ASAT1::NC_090811.1:1242156-1244155(-)	TF_motif_seq_0274	BIHD1OS	141	-	TGTCA	(Motif sequence only)
gene-ASAT1::NC_090811.1:1242156-1244155(-)	TF_motif_seq_0274	BIHD1OS	172	+	TGTTA	(Motif sequence only)
gene-ASAT1::NC_090811.1:1242156-1244155(-)	TF_motif_seq_0274	BIHD1OS	221	+	TTTCA	(Motif sequence only)
gene-ASAT1::NC_090811.1:1242156-1244155(-)	TF_motif_seq_0274	BIHD1OS	261	+	TGACA	(Motif sequence only)
gene-ASAT1::NC_090811.1:1242156-1244155(-)	TF_motif_seq_0274	BIHD1OS	261	-	TGACA	(Motif sequence only)
gene-ASAT1::NC_090811.1:1242156-1244155(-)	TF_motif_seq_0274	BIHD1OS	282	-	TTACA	(Motif sequence only)
gene-ASAT1::NC_090811.1:1242156-1244155(-)	TF_motif_seq_0274	BIHD1OS	345	+	TGACA	(Motif sequence only)
gene-ASAT1::NC_090811.1:1242156-1244155(-)	TF_motif_seq_0274	BIHD1OS	345	-	TGACA	(Motif sequence only)
gene-ASAT1::NC_090811.1:1242156-1244155(-)	TF_motif_seq_0274	BIHD1OS	364	+	TGTAA	(Motif sequence only)
gene-ASAT1::NC_090811.1:1242156-1244155(-)	TF_motif_seq_0274	BIHD1OS	404	-	TGACC	(Motif sequence only)
gene-ASAT1::NC_090811.1:1242156-1244155(-)	TF_motif_seq_0274	BIHD1OS	417	+	TGTTA	(Motif sequence only)
gene-ASAT1::NC_090811.1:1242156-1244155(-)	TF_motif_seq_0274	BIHD1OS	426	+	TTTCA	(Motif sequence only)
gene-ASAT1::NC_090811.1:1242156-1244155(-)	TF_motif_seq_0274	BIHD1OS	482	+	GGTCA	(Motif sequence only)
gene-ASAT1::NC_090811.1:1242156-1244155(-)	TF_motif_seq_0274	BIHD1OS	523	-	TGAAA	(Motif sequence only)
gene-ASAT1::NC_090811.1:1242156-1244155(-)	TF_motif_seq_0274	BIHD1OS	563	+	TTTCA	(Motif sequence only)
gene-ASAT1::NC_090811.1:1242156-1244155(-)	TF_motif_seq_0274	BIHD1OS	576	-	TGATA	(Motif sequence only)
gene-ASAT1::NC_090811.1:1242156-1244155(-)	TF_motif_seq_0274	BIHD1OS	675	-	TCACA	(Motif sequence only)
gene-ASAT1::NC_090811.1:1242156-1244155(-)	TF_motif_seq_0274	BIHD1OS	689	+	TCTCA	(Motif sequence only)
gene-ASAT1::NC_090811.1:1242156-1244155(-)	TF_motif_seq_0274	BIHD1OS	723	-	AGACA	(Motif sequence only)
gene-ASAT1::NC_090811.1:1242156-1244155(-)	TF_motif_seq_0274	BIHD1OS	733	-	TAACA	(Motif sequence only)
gene-ASAT1::NC_090811.1:1242156-1244155(-)	TF_motif_seq_0274	BIHD1OS	791	+	TGTCA	(Motif sequence only)
gene-ASAT1::NC_090811.1:1242156-1244155(-)	TF_motif_seq_0274	BIHD1OS	791	-	TGTCA	(Motif sequence only)
gene-ASAT1::NC_090811.1:1242156-1244155(-)	TF_motif_seq_0274	BIHD1OS	809	+	TATCA	(Motif sequence only)
gene-ASAT1::NC_090811.1:1242156-1244155(-)	TF_motif_seq_0274	BIHD1OS	862	-	TGATA	(Motif sequence only)
gene-ASAT1::NC_090811.1:1242156-1244155(-)	TF_motif_seq_0274	BIHD1OS	902	-	TGAAA	(Motif sequence only)
gene-ASAT1::NC_090811.1:1242156-1244155(-)	TF_motif_seq_0274	BIHD1OS	930	-	TGAAA	(Motif sequence only)
gene-ASAT1::NC_090811.1:1242156-1244155(-)	TF_motif_seq_0274	BIHD1OS	941	+	TTTCA	(Motif sequence only)
gene-ASAT1::NC_090811.1:1242156-1244155(-)	TF_motif_seq_0274	BIHD1OS	947	-	TGAGA	(Motif sequence only)
gene-ASAT1::NC_090811.1:1242156-1244155(-)	TF_motif_seq_0274	BIHD1OS	1025	+	TGTTA	(Motif sequence only)
gene-ASAT1::NC_090811.1:1242156-1244155(-)	TF_motif_seq_0274	BIHD1OS	1027	-	TTACA	(Motif sequence only)
gene-ASAT1::NC_090811.1:1242156-1244155(-)	TF_motif_seq_0274	BIHD1OS	1036	-	TGAGA	(Motif sequence only)
gene-ASAT1::NC_090811.1:1242156-1244155(-)	TF_motif_seq_0274	BIHD1OS	1052	+	TGTCG	(Motif sequence only)
gene-ASAT1::NC_090811.1:1242156-1244155(-)	TF_motif_seq_0274	BIHD1OS	1110	-	TGATA	(Motif sequence only)
gene-ASAT1::NC_090811.1:1242156-1244155(-)	TF_motif_seq_0274	BIHD1OS	1121	+	TGTGA	(Motif sequence only)
gene-ASAT1::NC_090811.1:1242156-1244155(-)	TF_motif_seq_0274	BIHD1OS	1123	-	TGATA	(Motif sequence only)
gene-ASAT1::NC_090811.1:1242156-1244155(-)	TF_motif_seq_0274	BIHD1OS	1181	+	TGTCA	(Motif sequence only)
gene-ASAT1::NC_090811.1:1242156-1244155(-)	TF_motif_seq_0274	BIHD1OS	1181	-	TGTCA	(Motif sequence only)
gene-ASAT1::NC_090811.1:1242156-1244155(-)	TF_motif_seq_0274	BIHD1OS	1207	-	TGATA	(Motif sequence only)
gene-ASAT1::NC_090811.1:1242156-1244155(-)	TF_motif_seq_0274	BIHD1OS	1275	+	GGTCA	(Motif sequence only)
gene-ASAT1::NC_090811.1:1242156-1244155(-)	TF_motif_seq_0274	BIHD1OS	1361	-	TAACA	(Motif sequence only)
gene-ASAT1::NC_090811.1:1242156-1244155(-)	TF_motif_seq_0274	BIHD1OS	1366	+	TGTCC	(Motif sequence only)
gene-ASAT1::NC_090811.1:1242156-1244155(-)	TF_motif_seq_0274	BIHD1OS	1372	-	TCACA	(Motif sequence only)
gene-ASAT1::NC_090811.1:1242156-1244155(-)	TF_motif_seq_0274	BIHD1OS	1401	+	TGTCT	(Motif sequence only)
gene-ASAT1::NC_090811.1:1242156-1244155(-)	TF_motif_seq_0274	BIHD1OS	1476	+	TATCA	(Motif sequence only)
gene-ASAT1::NC_090811.1:1242156-1244155(-)	TF_motif_seq_0274	BIHD1OS	1505	-	TTACA	(Motif sequence only)
gene-ASAT1::NC_090811.1:1242156-1244155(-)	TF_motif_seq_0274	BIHD1OS	1534	+	TTTCA	(Motif sequence only)
gene-ASAT1::NC_090811.1:1242156-1244155(-)	TF_motif_seq_0274	BIHD1OS	1584	-	TAACA	(Motif sequence only)
gene-ASAT1::NC_090811.1:1242156-1244155(-)	TF_motif_seq_0274	BIHD1OS	1604	+	TGTGA	(Motif sequence only)
gene-ASAT1::NC_090811.1:1242156-1244155(-)	TF_motif_seq_0274	BIHD1OS	1707	-	TCACA	(Motif sequence only)
gene-ASAT1::NC_090811.1:1242156-1244155(-)	TF_motif_seq_0274	BIHD1OS	1715	-	TAACA	(Motif sequence only)
gene-ASAT1::NC_090811.1:1242156-1244155(-)	TF_motif_seq_0274	BIHD1OS	1736	+	TGACA	(Motif sequence only)
gene-ASAT1::NC_090811.1:1242156-1244155(-)	TF_motif_seq_0274	BIHD1OS	1736	-	TGACA	(Motif sequence only)
gene-ASAT1::NC_090811.1:1242156-1244155(-)	TF_motif_seq_0274	BIHD1OS	1839	-	TGACG	(Motif sequence only)
gene-ASAT1::NC_090811.1:1242156-1244155(-)	TF_motif_seq_0274	BIHD1OS	1908	+	TGCCA	(Motif sequence only)
gene-ASAT1::NC_090811.1:1242156-1244155(-)	TF_motif_seq_0274	BIHD1OS	1908	-	TGCCA	(Motif sequence only)
gene-ASAT1::NC_090811.1:1242156-1244155(-)	TF_motif_seq_0274	BIHD1OS	1915	+	TTTCA	(Motif sequence only)
gene-ASAT1::NC_090811.1:1242156-1244155(-)	TF_motif_seq_0274	BIHD1OS	1951	+	TGGCA	(Motif sequence only)
gene-ASAT1::NC_090811.1:1242156-1244155(-)	TF_motif_seq_0274	BIHD1OS	1951	-	TGGCA	(Motif sequence only)
gene-ASAT1::NC_090811.1:1242156-1244155(-)	TF_motif_seq_0274	BIHD1OS	1981	+	TTTCA	(Motif sequence only)
gene-ASAT1::NC_090811.1:1242156-1244155(-)	TF_motif_seq_0275	WBOXATNPR1	40	-	TTCAA	(Motif sequence only)
gene-ASAT1::NC_090811.1:1242156-1244155(-)	TF_motif_seq_0275	WBOXATNPR1	47	-	GACAA	(Motif sequence only)
gene-ASAT1::NC_090811.1:1242156-1244155(-)	TF_motif_seq_0275	WBOXATNPR1	109	+	TAGAC	(Motif sequence only)
gene-ASAT1::NC_090811.1:1242156-1244155(-)	TF_motif_seq_0275	WBOXATNPR1	142	-	GTCAA	(Motif sequence only)
gene-ASAT1::NC_090811.1:1242156-1244155(-)	TF_motif_seq_0275	WBOXATNPR1	159	-	GTGAA	(Motif sequence only)
gene-ASAT1::NC_090811.1:1242156-1244155(-)	TF_motif_seq_0275	WBOXATNPR1	210	+	TTTAC	(Motif sequence only)
gene-ASAT1::NC_090811.1:1242156-1244155(-)	TF_motif_seq_0275	WBOXATNPR1	222	+	TTCAC	(Motif sequence only)
gene-ASAT1::NC_090811.1:1242156-1244155(-)	TF_motif_seq_0275	WBOXATNPR1	260	+	TTGAC	(Motif sequence only)
gene-ASAT1::NC_090811.1:1242156-1244155(-)	TF_motif_seq_0275	WBOXATNPR1	262	-	GACAA	(Motif sequence only)
gene-ASAT1::NC_090811.1:1242156-1244155(-)	TF_motif_seq_0275	WBOXATNPR1	302	+	TTGAA	(Motif sequence only)
gene-ASAT1::NC_090811.1:1242156-1244155(-)	TF_motif_seq_0275	WBOXATNPR1	344	+	CTGAC	(Motif sequence only)
gene-ASAT1::NC_090811.1:1242156-1244155(-)	TF_motif_seq_0275	WBOXATNPR1	346	-	GACAA	(Motif sequence only)
gene-ASAT1::NC_090811.1:1242156-1244155(-)	TF_motif_seq_0275	WBOXATNPR1	377	-	TTCAA	(Motif sequence only)
gene-ASAT1::NC_090811.1:1242156-1244155(-)	TF_motif_seq_0275	WBOXATNPR1	387	-	CTCAA	(Motif sequence only)
gene-ASAT1::NC_090811.1:1242156-1244155(-)	TF_motif_seq_0275	WBOXATNPR1	403	+	TTGAC	(Motif sequence only)
gene-ASAT1::NC_090811.1:1242156-1244155(-)	TF_motif_seq_0275	WBOXATNPR1	427	+	TTCAC	(Motif sequence only)
gene-ASAT1::NC_090811.1:1242156-1244155(-)	TF_motif_seq_0275	WBOXATNPR1	455	+	TTGAA	(Motif sequence only)
gene-ASAT1::NC_090811.1:1242156-1244155(-)	TF_motif_seq_0275	WBOXATNPR1	483	-	GTCAC	(Motif sequence only)
gene-ASAT1::NC_090811.1:1242156-1244155(-)	TF_motif_seq_0275	WBOXATNPR1	514	-	TTCAA	(Motif sequence only)
gene-ASAT1::NC_090811.1:1242156-1244155(-)	TF_motif_seq_0275	WBOXATNPR1	522	+	TTGAA	(Motif sequence only)
gene-ASAT1::NC_090811.1:1242156-1244155(-)	TF_motif_seq_0275	WBOXATNPR1	564	+	TTCAC	(Motif sequence only)
gene-ASAT1::NC_090811.1:1242156-1244155(-)	TF_motif_seq_0275	WBOXATNPR1	645	+	TTCAC	(Motif sequence only)
gene-ASAT1::NC_090811.1:1242156-1244155(-)	TF_motif_seq_0275	WBOXATNPR1	654	-	GTGAA	(Motif sequence only)
gene-ASAT1::NC_090811.1:1242156-1244155(-)	TF_motif_seq_0275	WBOXATNPR1	674	+	TTCAC	(Motif sequence only)
gene-ASAT1::NC_090811.1:1242156-1244155(-)	TF_motif_seq_0275	WBOXATNPR1	690	-	CTCAA	(Motif sequence only)
gene-ASAT1::NC_090811.1:1242156-1244155(-)	TF_motif_seq_0275	WBOXATNPR1	724	-	GACAA	(Motif sequence only)
gene-ASAT1::NC_090811.1:1242156-1244155(-)	TF_motif_seq_0275	WBOXATNPR1	790	+	TTGTC	(Motif sequence only)
gene-ASAT1::NC_090811.1:1242156-1244155(-)	TF_motif_seq_0275	WBOXATNPR1	792	-	GTCAC	(Motif sequence only)
gene-ASAT1::NC_090811.1:1242156-1244155(-)	TF_motif_seq_0275	WBOXATNPR1	797	+	TTGAT	(Motif sequence only)
gene-ASAT1::NC_090811.1:1242156-1244155(-)	TF_motif_seq_0275	WBOXATNPR1	842	-	TTCAA	(Motif sequence only)
gene-ASAT1::NC_090811.1:1242156-1244155(-)	TF_motif_seq_0275	WBOXATNPR1	861	+	TTGAT	(Motif sequence only)
gene-ASAT1::NC_090811.1:1242156-1244155(-)	TF_motif_seq_0275	WBOXATNPR1	897	+	TTGAA	(Motif sequence only)
gene-ASAT1::NC_090811.1:1242156-1244155(-)	TF_motif_seq_0275	WBOXATNPR1	915	+	TTGAG	(Motif sequence only)
gene-ASAT1::NC_090811.1:1242156-1244155(-)	TF_motif_seq_0275	WBOXATNPR1	946	+	TTGAG	(Motif sequence only)
gene-ASAT1::NC_090811.1:1242156-1244155(-)	TF_motif_seq_0275	WBOXATNPR1	960	+	TTTAC	(Motif sequence only)
gene-ASAT1::NC_090811.1:1242156-1244155(-)	TF_motif_seq_0275	WBOXATNPR1	1035	+	TTGAG	(Motif sequence only)
gene-ASAT1::NC_090811.1:1242156-1244155(-)	TF_motif_seq_0275	WBOXATNPR1	1051	+	TTGTC	(Motif sequence only)
gene-ASAT1::NC_090811.1:1242156-1244155(-)	TF_motif_seq_0275	WBOXATNPR1	1073	+	TTTAC	(Motif sequence only)
gene-ASAT1::NC_090811.1:1242156-1244155(-)	TF_motif_seq_0275	WBOXATNPR1	1141	-	GTCGA	(Motif sequence only)
gene-ASAT1::NC_090811.1:1242156-1244155(-)	TF_motif_seq_0275	WBOXATNPR1	1165	+	TTGAA	(Motif sequence only)
gene-ASAT1::NC_090811.1:1242156-1244155(-)	TF_motif_seq_0275	WBOXATNPR1	1182	-	GTCAG	(Motif sequence only)
gene-ASAT1::NC_090811.1:1242156-1244155(-)	TF_motif_seq_0275	WBOXATNPR1	1252	-	GTTAA	(Motif sequence only)
gene-ASAT1::NC_090811.1:1242156-1244155(-)	TF_motif_seq_0275	WBOXATNPR1	1276	-	GTCAT	(Motif sequence only)
gene-ASAT1::NC_090811.1:1242156-1244155(-)	TF_motif_seq_0275	WBOXATNPR1	1321	-	GCCAA	(Motif sequence only)
gene-ASAT1::NC_090811.1:1242156-1244155(-)	TF_motif_seq_0275	WBOXATNPR1	1400	+	TTGTC	(Motif sequence only)
gene-ASAT1::NC_090811.1:1242156-1244155(-)	TF_motif_seq_0275	WBOXATNPR1	1504	+	TTTAC	(Motif sequence only)
gene-ASAT1::NC_090811.1:1242156-1244155(-)	TF_motif_seq_0275	WBOXATNPR1	1509	-	ATCAA	(Motif sequence only)
gene-ASAT1::NC_090811.1:1242156-1244155(-)	TF_motif_seq_0275	WBOXATNPR1	1515	+	TTAAC	(Motif sequence only)
gene-ASAT1::NC_090811.1:1242156-1244155(-)	TF_motif_seq_0275	WBOXATNPR1	1523	-	TTCAA	(Motif sequence only)
gene-ASAT1::NC_090811.1:1242156-1244155(-)	TF_motif_seq_0275	WBOXATNPR1	1605	-	GTGAA	(Motif sequence only)
gene-ASAT1::NC_090811.1:1242156-1244155(-)	TF_motif_seq_0275	WBOXATNPR1	1616	+	TCGAC	(Motif sequence only)
gene-ASAT1::NC_090811.1:1242156-1244155(-)	TF_motif_seq_0275	WBOXATNPR1	1706	+	TTCAC	(Motif sequence only)
gene-ASAT1::NC_090811.1:1242156-1244155(-)	TF_motif_seq_0275	WBOXATNPR1	1735	+	TTGAC	(Motif sequence only)
gene-ASAT1::NC_090811.1:1242156-1244155(-)	TF_motif_seq_0275	WBOXATNPR1	1760	+	TCGAC	(Motif sequence only)
gene-ASAT1::NC_090811.1:1242156-1244155(-)	TF_motif_seq_0275	WBOXATNPR1	1768	+	TCGAC	(Motif sequence only)
gene-ASAT1::NC_090811.1:1242156-1244155(-)	TF_motif_seq_0275	WBOXATNPR1	1798	-	CTCAA	(Motif sequence only)
gene-ASAT1::NC_090811.1:1242156-1244155(-)	TF_motif_seq_0275	WBOXATNPR1	1831	-	GTCGA	(Motif sequence only)
gene-ASAT1::NC_090811.1:1242156-1244155(-)	TF_motif_seq_0275	WBOXATNPR1	1838	+	TTGAC	(Motif sequence only)
gene-ASAT1::NC_090811.1:1242156-1244155(-)	TF_motif_seq_0275	WBOXATNPR1	1876	-	GTCTA	(Motif sequence only)
gene-ASAT1::NC_090811.1:1242156-1244155(-)	TF_motif_seq_0275	WBOXATNPR1	1907	+	TTGCC	(Motif sequence only)
gene-ASAT1::NC_090811.1:1242156-1244155(-)	TF_motif_seq_0275	WBOXATNPR1	1909	-	GCCAA	(Motif sequence only)
gene-ASAT1::NC_090811.1:1242156-1244155(-)	TF_motif_seq_0275	WBOXATNPR1	1916	-	TTCAA	(Motif sequence only)
gene-ASAT1::NC_090811.1:1242156-1244155(-)	TF_motif_seq_0275	WBOXATNPR1	1943	-	GTTAA	(Motif sequence only)
gene-ASAT1::NC_090811.1:1242156-1244155(-)	TF_motif_seq_0275	WBOXATNPR1	1990	-	TTCAA	(Motif sequence only)
gene-ASAT1::NC_090811.1:1242156-1244155(-)	TF_motif_seq_0276	OSE1ROOTNODULE	728	+	AAAGAt	(Motif sequence only)
gene-ASAT1::NC_090811.1:1242156-1244155(-)	TF_motif_seq_0280	ACGTTBOX	7	+	AATGTt	(Motif sequence only)
gene-ASAT1::NC_090811.1:1242156-1244155(-)	TF_motif_seq_0280	ACGTTBOX	7	-	aATGTT	(Motif sequence only)
gene-ASAT1::NC_090811.1:1242156-1244155(-)	TF_motif_seq_0280	ACGTTBOX	162	+	AACTTt	(Motif sequence only)
gene-ASAT1::NC_090811.1:1242156-1244155(-)	TF_motif_seq_0280	ACGTTBOX	162	-	aACTTT	(Motif sequence only)
gene-ASAT1::NC_090811.1:1242156-1244155(-)	TF_motif_seq_0280	ACGTTBOX	242	+	AAAGTt	(Motif sequence only)
gene-ASAT1::NC_090811.1:1242156-1244155(-)	TF_motif_seq_0280	ACGTTBOX	242	-	aAAGTT	(Motif sequence only)
gene-ASAT1::NC_090811.1:1242156-1244155(-)	TF_motif_seq_0280	ACGTTBOX	296	+	AACATt	(Motif sequence only)
gene-ASAT1::NC_090811.1:1242156-1244155(-)	TF_motif_seq_0280	ACGTTBOX	296	-	aACATT	(Motif sequence only)
gene-ASAT1::NC_090811.1:1242156-1244155(-)	TF_motif_seq_0280	ACGTTBOX	373	+	TACGTt	(Motif sequence only)
gene-ASAT1::NC_090811.1:1242156-1244155(-)	TF_motif_seq_0280	ACGTTBOX	373	-	tACGTT	(Motif sequence only)
gene-ASAT1::NC_090811.1:1242156-1244155(-)	TF_motif_seq_0280	ACGTTBOX	510	+	AAAGTt	(Motif sequence only)
gene-ASAT1::NC_090811.1:1242156-1244155(-)	TF_motif_seq_0280	ACGTTBOX	510	-	aAAGTT	(Motif sequence only)
gene-ASAT1::NC_090811.1:1242156-1244155(-)	TF_motif_seq_0280	ACGTTBOX	558	+	AACTTt	(Motif sequence only)
gene-ASAT1::NC_090811.1:1242156-1244155(-)	TF_motif_seq_0280	ACGTTBOX	558	-	aACTTT	(Motif sequence only)
gene-ASAT1::NC_090811.1:1242156-1244155(-)	TF_motif_seq_0280	ACGTTBOX	702	+	AAGGTt	(Motif sequence only)
gene-ASAT1::NC_090811.1:1242156-1244155(-)	TF_motif_seq_0280	ACGTTBOX	702	-	aAGGTT	(Motif sequence only)
gene-ASAT1::NC_090811.1:1242156-1244155(-)	TF_motif_seq_0280	ACGTTBOX	1528	+	AACATt	(Motif sequence only)
gene-ASAT1::NC_090811.1:1242156-1244155(-)	TF_motif_seq_0280	ACGTTBOX	1528	-	aACATT	(Motif sequence only)
gene-ASAT1::NC_090811.1:1242156-1244155(-)	TF_motif_seq_0283	POLASIG3	21	-	gTTATT	(Motif sequence only)
gene-ASAT1::NC_090811.1:1242156-1244155(-)	TF_motif_seq_0283	POLASIG3	165	-	tTTATT	(Motif sequence only)
gene-ASAT1::NC_090811.1:1242156-1244155(-)	TF_motif_seq_0283	POLASIG3	235	+	AATAAa	(Motif sequence only)
gene-ASAT1::NC_090811.1:1242156-1244155(-)	TF_motif_seq_0283	POLASIG3	305	+	AATAAt	(Motif sequence only)
gene-ASAT1::NC_090811.1:1242156-1244155(-)	TF_motif_seq_0283	POLASIG3	467	-	gTTATT	(Motif sequence only)
gene-ASAT1::NC_090811.1:1242156-1244155(-)	TF_motif_seq_0283	POLASIG3	838	-	tTTATT	(Motif sequence only)
gene-ASAT1::NC_090811.1:1242156-1244155(-)	TF_motif_seq_0283	POLASIG3	923	-	cTTATT	(Motif sequence only)
gene-ASAT1::NC_090811.1:1242156-1244155(-)	TF_motif_seq_0283	POLASIG3	934	+	AATAAt	(Motif sequence only)
gene-ASAT1::NC_090811.1:1242156-1244155(-)	TF_motif_seq_0283	POLASIG3	1018	-	tTTATT	(Motif sequence only)
gene-ASAT1::NC_090811.1:1242156-1244155(-)	TF_motif_seq_0283	POLASIG3	1031	-	aTTATT	(Motif sequence only)
gene-ASAT1::NC_090811.1:1242156-1244155(-)	TF_motif_seq_0283	POLASIG3	1130	-	cTTATT	(Motif sequence only)
gene-ASAT1::NC_090811.1:1242156-1244155(-)	TF_motif_seq_0283	POLASIG3	1300	-	aTTATT	(Motif sequence only)
gene-ASAT1::NC_090811.1:1242156-1244155(-)	TF_motif_seq_0283	POLASIG3	1340	-	gTTATT	(Motif sequence only)
gene-ASAT1::NC_090811.1:1242156-1244155(-)	TF_motif_seq_0283	POLASIG3	1423	+	AATAAa	(Motif sequence only)
gene-ASAT1::NC_090811.1:1242156-1244155(-)	TF_motif_seq_0283	POLASIG3	1467	-	gTTATT	(Motif sequence only)
gene-ASAT1::NC_090811.1:1242156-1244155(-)	TF_motif_seq_0283	POLASIG3	1588	+	AATAAt	(Motif sequence only)
gene-ASAT1::NC_090811.1:1242156-1244155(-)	TF_motif_seq_0283	POLASIG3	1591	+	AATAAa	(Motif sequence only)
gene-ASAT1::NC_090811.1:1242156-1244155(-)	TF_motif_seq_0283	POLASIG3	1608	+	AATAAa	(Motif sequence only)
gene-ASAT1::NC_090811.1:1242156-1244155(-)	TF_motif_seq_0288	PREATPRODH	1939	-	aTGAGT	(Motif sequence only)
gene-ASAT1::NC_090811.1:1242156-1244155(-)	TF_motif_seq_0290	TBOXATGAPB	1646	+	ACTTTg	(Motif sequence only)
gene-ASAT1::NC_090811.1:1242156-1244155(-)	TF_motif_seq_0294	QELEMENTZMZM13	481	+	AGGTCa	(Motif sequence only)
gene-ASAT1::NC_090811.1:1242156-1244155(-)	TF_motif_seq_0295	BOXIINTPATPB	1067	-	tTCTAT	(Motif sequence only)
gene-ASAT1::NC_090811.1:1242156-1244155(-)	TF_motif_seq_0295	BOXIINTPATPB	1093	+	ATAGAa	(Motif sequence only)
gene-ASAT1::NC_090811.1:1242156-1244155(-)	TF_motif_seq_0295	BOXIINTPATPB	1209	+	ATAGAa	(Motif sequence only)
gene-ASAT1::NC_090811.1:1242156-1244155(-)	TF_motif_seq_0297	CAREOSREP1	264	+	CAACTc	(Motif sequence only)
gene-ASAT1::NC_090811.1:1242156-1244155(-)	TF_motif_seq_0303	CATATGGMSAUR	434	-	aATATG	(Motif sequence only)
gene-ASAT1::NC_090811.1:1242156-1244155(-)	TF_motif_seq_0303	CATATGGMSAUR	670	+	CATATt	(Motif sequence only)
gene-ASAT1::NC_090811.1:1242156-1244155(-)	TF_motif_seq_0303	CATATGGMSAUR	812	+	CATATg	(Motif sequence only)
gene-ASAT1::NC_090811.1:1242156-1244155(-)	TF_motif_seq_0303	CATATGGMSAUR	812	-	cATATG	(Motif sequence only)
gene-ASAT1::NC_090811.1:1242156-1244155(-)	TF_motif_seq_0303	CATATGGMSAUR	1088	+	CATATa	(Motif sequence only)
gene-ASAT1::NC_090811.1:1242156-1244155(-)	TF_motif_seq_0303	CATATGGMSAUR	1151	-	tATATG	(Motif sequence only)
gene-ASAT1::NC_090811.1:1242156-1244155(-)	TF_motif_seq_0303	CATATGGMSAUR	1177	-	gATATG	(Motif sequence only)
gene-ASAT1::NC_090811.1:1242156-1244155(-)	TF_motif_seq_0303	CATATGGMSAUR	1787	+	CATATg	(Motif sequence only)
gene-ASAT1::NC_090811.1:1242156-1244155(-)	TF_motif_seq_0303	CATATGGMSAUR	1787	-	cATATG	(Motif sequence only)
gene-ASAT1::NC_090811.1:1242156-1244155(-)	TF_motif_seq_0303	CATATGGMSAUR	1891	+	CATATa	(Motif sequence only)
gene-ASAT1::NC_090811.1:1242156-1244155(-)	TF_motif_seq_0304	RYREPEATBNNAPA	1543	-	tGCATG	(Motif sequence only)
gene-ASAT1::NC_090811.1:1242156-1244155(-)	TF_motif_seq_0304	RYREPEATBNNAPA	1545	+	CATGCa	(Motif sequence only)
gene-ASAT1::NC_090811.1:1242156-1244155(-)	TF_motif_seq_0306	LTRE1HVBLT49	772	-	tTTCGG	(Motif sequence only)
gene-ASAT1::NC_090811.1:1242156-1244155(-)	TF_motif_seq_0308	HEXAMERATH4	1227	-	cGACGG	(Motif sequence only)
gene-ASAT1::NC_090811.1:1242156-1244155(-)	TF_motif_seq_0309	PYRIMIDINEBOXOSRAMY1A	408	+	CCTTTt	(Motif sequence only)
gene-ASAT1::NC_090811.1:1242156-1244155(-)	TF_motif_seq_0309	PYRIMIDINEBOXOSRAMY1A	1256	-	aAAAGG	(Motif sequence only)
gene-ASAT1::NC_090811.1:1242156-1244155(-)	TF_motif_seq_0309	PYRIMIDINEBOXOSRAMY1A	1640	-	aAAAGG	(Motif sequence only)
gene-ASAT1::NC_090811.1:1242156-1244155(-)	TF_motif_seq_0314	WBOXNTCHN48	344	+	CTGACa	(Motif sequence only)
gene-ASAT1::NC_090811.1:1242156-1244155(-)	TF_motif_seq_0314	WBOXNTCHN48	1181	-	tGTCAG	(Motif sequence only)
gene-ASAT1::NC_090811.1:1242156-1244155(-)	TF_motif_seq_0315	GT1GMSCAM4	219	-	tTTTTC	(Motif sequence only)
gene-ASAT1::NC_090811.1:1242156-1244155(-)	TF_motif_seq_0315	GT1GMSCAM4	561	-	tTTTTC	(Motif sequence only)
gene-ASAT1::NC_090811.1:1242156-1244155(-)	TF_motif_seq_0315	GT1GMSCAM4	850	+	GAAAAa	(Motif sequence only)
gene-ASAT1::NC_090811.1:1242156-1244155(-)	TF_motif_seq_0315	GT1GMSCAM4	939	-	tTTTTC	(Motif sequence only)
gene-ASAT1::NC_090811.1:1242156-1244155(-)	TF_motif_seq_0315	GT1GMSCAM4	952	-	tTTTTC	(Motif sequence only)
gene-ASAT1::NC_090811.1:1242156-1244155(-)	TF_motif_seq_0315	GT1GMSCAM4	1457	+	GAAAAa	(Motif sequence only)
gene-ASAT1::NC_090811.1:1242156-1244155(-)	TF_motif_seq_0315	GT1GMSCAM4	1532	-	tTTTTC	(Motif sequence only)
gene-ASAT1::NC_090811.1:1242156-1244155(-)	TF_motif_seq_0315	GT1GMSCAM4	1870	-	tTTTTC	(Motif sequence only)
gene-ASAT1::NC_090811.1:1242156-1244155(-)	TF_motif_seq_0317	IBOX	120	-	cTTATC	(Motif sequence only)
gene-ASAT1::NC_090811.1:1242156-1244155(-)	TF_motif_seq_0318	GCCCORE	1077	-	cGCGGC	(Motif sequence only)
gene-ASAT1::NC_090811.1:1242156-1244155(-)	TF_motif_seq_0321	GT1CONSENSUS	219	-	tTTTTC	(Motif sequence only)
gene-ASAT1::NC_090811.1:1242156-1244155(-)	TF_motif_seq_0321	GT1CONSENSUS	317	-	aTTATC	(Motif sequence only)
gene-ASAT1::NC_090811.1:1242156-1244155(-)	TF_motif_seq_0321	GT1CONSENSUS	411	-	tTTATC	(Motif sequence only)
gene-ASAT1::NC_090811.1:1242156-1244155(-)	TF_motif_seq_0321	GT1CONSENSUS	524	+	GAAAAt	(Motif sequence only)
gene-ASAT1::NC_090811.1:1242156-1244155(-)	TF_motif_seq_0321	GT1CONSENSUS	561	-	tTTTTC	(Motif sequence only)
gene-ASAT1::NC_090811.1:1242156-1244155(-)	TF_motif_seq_0321	GT1CONSENSUS	577	+	GATAAa	(Motif sequence only)
gene-ASAT1::NC_090811.1:1242156-1244155(-)	TF_motif_seq_0321	GT1CONSENSUS	850	+	GAAAAa	(Motif sequence only)
gene-ASAT1::NC_090811.1:1242156-1244155(-)	TF_motif_seq_0321	GT1CONSENSUS	863	+	GATAAt	(Motif sequence only)
gene-ASAT1::NC_090811.1:1242156-1244155(-)	TF_motif_seq_0321	GT1CONSENSUS	931	+	GAAAAt	(Motif sequence only)
gene-ASAT1::NC_090811.1:1242156-1244155(-)	TF_motif_seq_0321	GT1CONSENSUS	939	-	tTTTTC	(Motif sequence only)
gene-ASAT1::NC_090811.1:1242156-1244155(-)	TF_motif_seq_0321	GT1CONSENSUS	952	-	tTTTTC	(Motif sequence only)
gene-ASAT1::NC_090811.1:1242156-1244155(-)	TF_motif_seq_0321	GT1CONSENSUS	993	-	tTTATC	(Motif sequence only)
gene-ASAT1::NC_090811.1:1242156-1244155(-)	TF_motif_seq_0321	GT1CONSENSUS	1039	+	GATAAt	(Motif sequence only)
gene-ASAT1::NC_090811.1:1242156-1244155(-)	TF_motif_seq_0321	GT1CONSENSUS	1111	+	GATAAa	(Motif sequence only)
gene-ASAT1::NC_090811.1:1242156-1244155(-)	TF_motif_seq_0321	GT1CONSENSUS	1124	+	GATAAt	(Motif sequence only)
gene-ASAT1::NC_090811.1:1242156-1244155(-)	TF_motif_seq_0321	GT1CONSENSUS	1144	+	GATAAa	(Motif sequence only)
gene-ASAT1::NC_090811.1:1242156-1244155(-)	TF_motif_seq_0321	GT1CONSENSUS	1310	-	aTTTTC	(Motif sequence only)
gene-ASAT1::NC_090811.1:1242156-1244155(-)	TF_motif_seq_0321	GT1CONSENSUS	1406	-	tTTATC	(Motif sequence only)
gene-ASAT1::NC_090811.1:1242156-1244155(-)	TF_motif_seq_0321	GT1CONSENSUS	1446	+	GATAAt	(Motif sequence only)
gene-ASAT1::NC_090811.1:1242156-1244155(-)	TF_motif_seq_0321	GT1CONSENSUS	1457	+	GAAAAa	(Motif sequence only)
gene-ASAT1::NC_090811.1:1242156-1244155(-)	TF_motif_seq_0321	GT1CONSENSUS	1487	-	tTTATC	(Motif sequence only)
gene-ASAT1::NC_090811.1:1242156-1244155(-)	TF_motif_seq_0321	GT1CONSENSUS	1532	-	tTTTTC	(Motif sequence only)
gene-ASAT1::NC_090811.1:1242156-1244155(-)	TF_motif_seq_0321	GT1CONSENSUS	1626	+	GATAAa	(Motif sequence only)
gene-ASAT1::NC_090811.1:1242156-1244155(-)	TF_motif_seq_0321	GT1CONSENSUS	1870	-	tTTTTC	(Motif sequence only)
gene-ASAT1::NC_090811.1:1242156-1244155(-)	TF_motif_seq_0322	CRTDREHVCBF2	402	+	GTTGAc	(Motif sequence only)
gene-ASAT1::NC_090811.1:1242156-1244155(-)	TF_motif_seq_0322	CRTDREHVCBF2	402	-	gTTGAC	(Motif sequence only)
gene-ASAT1::NC_090811.1:1242156-1244155(-)	TF_motif_seq_0322	CRTDREHVCBF2	1141	+	GTCGAt	(Motif sequence only)
gene-ASAT1::NC_090811.1:1242156-1244155(-)	TF_motif_seq_0322	CRTDREHVCBF2	1141	-	gTCGAT	(Motif sequence only)
gene-ASAT1::NC_090811.1:1242156-1244155(-)	TF_motif_seq_0322	CRTDREHVCBF2	1225	+	GACGAc	(Motif sequence only)
gene-ASAT1::NC_090811.1:1242156-1244155(-)	TF_motif_seq_0322	CRTDREHVCBF2	1225	-	gACGAC	(Motif sequence only)
gene-ASAT1::NC_090811.1:1242156-1244155(-)	TF_motif_seq_0322	CRTDREHVCBF2	1615	+	ATCGAc	(Motif sequence only)
gene-ASAT1::NC_090811.1:1242156-1244155(-)	TF_motif_seq_0322	CRTDREHVCBF2	1615	-	aTCGAC	(Motif sequence only)
gene-ASAT1::NC_090811.1:1242156-1244155(-)	TF_motif_seq_0322	CRTDREHVCBF2	1759	+	TTCGAc	(Motif sequence only)
gene-ASAT1::NC_090811.1:1242156-1244155(-)	TF_motif_seq_0322	CRTDREHVCBF2	1759	-	tTCGAC	(Motif sequence only)
gene-ASAT1::NC_090811.1:1242156-1244155(-)	TF_motif_seq_0322	CRTDREHVCBF2	1767	+	TTCGAc	(Motif sequence only)
gene-ASAT1::NC_090811.1:1242156-1244155(-)	TF_motif_seq_0322	CRTDREHVCBF2	1767	-	tTCGAC	(Motif sequence only)
gene-ASAT1::NC_090811.1:1242156-1244155(-)	TF_motif_seq_0322	CRTDREHVCBF2	1831	+	GTCGAt	(Motif sequence only)
gene-ASAT1::NC_090811.1:1242156-1244155(-)	TF_motif_seq_0322	CRTDREHVCBF2	1831	-	gTCGAT	(Motif sequence only)
gene-ASAT1::NC_090811.1:1242156-1244155(-)	TF_motif_seq_0323	RHERPATEXPA7	999	+	GCACGa	(Motif sequence only)
gene-ASAT1::NC_090811.1:1242156-1244155(-)	TF_motif_seq_0323	RHERPATEXPA7	1054	-	tCGTGC	(Motif sequence only)
gene-ASAT1::NC_090811.1:1242156-1244155(-)	TF_motif_seq_0325	CBFHV	1141	-	GTCGAt	(Motif sequence only)
gene-ASAT1::NC_090811.1:1242156-1244155(-)	TF_motif_seq_0325	CBFHV	1615	+	aTCGAC	(Motif sequence only)
gene-ASAT1::NC_090811.1:1242156-1244155(-)	TF_motif_seq_0325	CBFHV	1831	-	GTCGAt	(Motif sequence only)
gene-ASAT1::NC_090811.1:1242156-1244155(-)	TF_motif_seq_0328	TATCCAOSAMY	1624	-	tGGATA	(Motif sequence only)
gene-ASAT1::NC_090811.1:1242156-1244155(-)	TF_motif_seq_0328	TATCCAOSAMY	1811	-	tGGATA	(Motif sequence only)
gene-ASAT1::NC_090811.1:1242156-1244155(-)	TF_motif_seq_0328	TATCCAOSAMY	1821	+	TATCCa	(Motif sequence only)
gene-ASAT1::NC_090811.1:1242156-1244155(-)	TF_motif_seq_0329	CPBCSPOR	469	+	TATTAg	(Motif sequence only)
gene-ASAT1::NC_090811.1:1242156-1244155(-)	TF_motif_seq_0330	-10PEHVPSBD	105	-	aGAATA	(Motif sequence only)
gene-ASAT1::NC_090811.1:1242156-1244155(-)	TF_motif_seq_0330	-10PEHVPSBD	1773	+	TATTCt	(Motif sequence only)
gene-ASAT1::NC_090811.1:1242156-1244155(-)	TF_motif_seq_0334	SITEIIATCYTC	1080	-	gGCCCA	(Motif sequence only)
gene-ASAT1::NC_090811.1:1242156-1244155(-)	TF_motif_seq_0336	SREATMSD	1625	-	gGATAA	(Motif sequence only)
gene-ASAT1::NC_090811.1:1242156-1244155(-)	TF_motif_seq_0336	SREATMSD	1812	-	gGATAA	(Motif sequence only)
gene-ASAT1::NC_090811.1:1242156-1244155(-)	TF_motif_seq_0340	CGCGBOXAT	1076	+	ACGCGg	(Motif sequence only)
gene-ASAT1::NC_090811.1:1242156-1244155(-)	TF_motif_seq_0340	CGCGBOXAT	1076	-	aCGCGG	(Motif sequence only)
gene-ASAT1::NC_090811.1:1242156-1244155(-)	TF_motif_seq_0340	CGCGBOXAT	1864	+	GCGCGc	(Motif sequence only)
gene-ASAT1::NC_090811.1:1242156-1244155(-)	TF_motif_seq_0340	CGCGBOXAT	1864	-	gCGCGC	(Motif sequence only)
gene-ASAT1::NC_090811.1:1242156-1244155(-)	TF_motif_seq_0341	MYB1AT	465	-	TGGTTa	(Motif sequence only)
gene-ASAT1::NC_090811.1:1242156-1244155(-)	TF_motif_seq_0341	MYB1AT	580	+	aAACCA	(Motif sequence only)
gene-ASAT1::NC_090811.1:1242156-1244155(-)	TF_motif_seq_0341	MYB1AT	743	+	gAACCA	(Motif sequence only)
gene-ASAT1::NC_090811.1:1242156-1244155(-)	TF_motif_seq_0341	MYB1AT	1720	+	tAACCA	(Motif sequence only)
gene-ASAT1::NC_090811.1:1242156-1244155(-)	TF_motif_seq_0341	MYB1AT	1969	+	aAACCA	(Motif sequence only)
gene-ASAT1::NC_090811.1:1242156-1244155(-)	TF_motif_seq_0342	MYB2CONSENSUSAT	49	+	cAACTG	(Motif sequence only)
gene-ASAT1::NC_090811.1:1242156-1244155(-)	TF_motif_seq_0342	MYB2CONSENSUSAT	379	+	cAACGG	(Motif sequence only)
gene-ASAT1::NC_090811.1:1242156-1244155(-)	TF_motif_seq_0343	ANAERO1CONSENSUS	201	-	ttTGTTT	(Motif sequence only)
gene-ASAT1::NC_090811.1:1242156-1244155(-)	TF_motif_seq_0343	ANAERO1CONSENSUS	205	-	ttTGTTT	(Motif sequence only)
gene-ASAT1::NC_090811.1:1242156-1244155(-)	TF_motif_seq_0343	ANAERO1CONSENSUS	245	-	gtTGTTT	(Motif sequence only)
gene-ASAT1::NC_090811.1:1242156-1244155(-)	TF_motif_seq_0343	ANAERO1CONSENSUS	490	+	AAACAaa	(Motif sequence only)
gene-ASAT1::NC_090811.1:1242156-1244155(-)	TF_motif_seq_0343	ANAERO1CONSENSUS	538	+	AAACAat	(Motif sequence only)
gene-ASAT1::NC_090811.1:1242156-1244155(-)	TF_motif_seq_0343	ANAERO1CONSENSUS	616	+	AAACAag	(Motif sequence only)
gene-ASAT1::NC_090811.1:1242156-1244155(-)	TF_motif_seq_0343	ANAERO1CONSENSUS	667	+	AAACAta	(Motif sequence only)
gene-ASAT1::NC_090811.1:1242156-1244155(-)	TF_motif_seq_0343	ANAERO1CONSENSUS	713	-	gtTGTTT	(Motif sequence only)
gene-ASAT1::NC_090811.1:1242156-1244155(-)	TF_motif_seq_0343	ANAERO1CONSENSUS	768	-	ctTGTTT	(Motif sequence only)
gene-ASAT1::NC_090811.1:1242156-1244155(-)	TF_motif_seq_0343	ANAERO1CONSENSUS	834	-	tcTGTTT	(Motif sequence only)
gene-ASAT1::NC_090811.1:1242156-1244155(-)	TF_motif_seq_0343	ANAERO1CONSENSUS	905	+	AAACAat	(Motif sequence only)
gene-ASAT1::NC_090811.1:1242156-1244155(-)	TF_motif_seq_0343	ANAERO1CONSENSUS	1085	+	AAACAta	(Motif sequence only)
gene-ASAT1::NC_090811.1:1242156-1244155(-)	TF_motif_seq_0343	ANAERO1CONSENSUS	1692	+	AAACAat	(Motif sequence only)
gene-ASAT1::NC_090811.1:1242156-1244155(-)	TF_motif_seq_0343	ANAERO1CONSENSUS	1964	+	AAACAaa	(Motif sequence only)
gene-ASAT1::NC_090811.1:1242156-1244155(-)	TF_motif_seq_0344	AACACOREOSGLUB1	169	-	ttTTGTT	(Motif sequence only)
gene-ASAT1::NC_090811.1:1242156-1244155(-)	TF_motif_seq_0344	AACACOREOSGLUB1	200	-	gtTTGTT	(Motif sequence only)
gene-ASAT1::NC_090811.1:1242156-1244155(-)	TF_motif_seq_0344	AACACOREOSGLUB1	204	-	gtTTGTT	(Motif sequence only)
gene-ASAT1::NC_090811.1:1242156-1244155(-)	TF_motif_seq_0344	AACACOREOSGLUB1	491	+	AACAAaa	(Motif sequence only)
gene-ASAT1::NC_090811.1:1242156-1244155(-)	TF_motif_seq_0344	AACACOREOSGLUB1	680	-	ttTTGTT	(Motif sequence only)
gene-ASAT1::NC_090811.1:1242156-1244155(-)	TF_motif_seq_0344	AACACOREOSGLUB1	1022	-	ttTTGTT	(Motif sequence only)
gene-ASAT1::NC_090811.1:1242156-1244155(-)	TF_motif_seq_0344	AACACOREOSGLUB1	1187	+	AACAAtc	(Motif sequence only)
gene-ASAT1::NC_090811.1:1242156-1244155(-)	TF_motif_seq_0344	AACACOREOSGLUB1	1213	+	AACAAtc	(Motif sequence only)
gene-ASAT1::NC_090811.1:1242156-1244155(-)	TF_motif_seq_0344	AACACOREOSGLUB1	1636	+	AACAAaa	(Motif sequence only)
gene-ASAT1::NC_090811.1:1242156-1244155(-)	TF_motif_seq_0344	AACACOREOSGLUB1	1701	-	ctTTGTT	(Motif sequence only)
gene-ASAT1::NC_090811.1:1242156-1244155(-)	TF_motif_seq_0344	AACACOREOSGLUB1	1965	+	AACAAaa	(Motif sequence only)
gene-ASAT1::NC_090811.1:1242156-1244155(-)	TF_motif_seq_0345	QARBNEXTA	284	-	acACGAT	(Motif sequence only)
gene-ASAT1::NC_090811.1:1242156-1244155(-)	TF_motif_seq_0345	QARBNEXTA	372	-	atACGTT	(Motif sequence only)
gene-ASAT1::NC_090811.1:1242156-1244155(-)	TF_motif_seq_0345	QARBNEXTA	1362	+	AACATgt	(Motif sequence only)
gene-ASAT1::NC_090811.1:1242156-1244155(-)	TF_motif_seq_0346	RBCSCONSENSUS	1801	+	AATCCga	(Motif sequence only)
gene-ASAT1::NC_090811.1:1242156-1244155(-)	TF_motif_seq_0350	DRE1COREZMRAB17	189	-	tcTTGGT	(Motif sequence only)
gene-ASAT1::NC_090811.1:1242156-1244155(-)	TF_motif_seq_0350	DRE1COREZMRAB17	320	+	ATCGAga	(Motif sequence only)
gene-ASAT1::NC_090811.1:1242156-1244155(-)	TF_motif_seq_0350	DRE1COREZMRAB17	1489	-	taTCGGT	(Motif sequence only)
gene-ASAT1::NC_090811.1:1242156-1244155(-)	TF_motif_seq_0357	2SSEEDPROTBANAPA	202	-	ttGTTTG	(Motif sequence only)
gene-ASAT1::NC_090811.1:1242156-1244155(-)	TF_motif_seq_0357	2SSEEDPROTBANAPA	1084	+	CAAACat	(Motif sequence only)
gene-ASAT1::NC_090811.1:1242156-1244155(-)	TF_motif_seq_0357	2SSEEDPROTBANAPA	1323	+	CAAACtc	(Motif sequence only)
gene-ASAT1::NC_090811.1:1242156-1244155(-)	TF_motif_seq_0361	RYREPEATGMGY2	1542	-	atGCATG	(Motif sequence only)
gene-ASAT1::NC_090811.1:1242156-1244155(-)	TF_motif_seq_0361	RYREPEATGMGY2	1545	+	CATGCat	(Motif sequence only)
gene-ASAT1::NC_090811.1:1242156-1244155(-)	TF_motif_seq_0362	RYREPEATLEGUMINBOX	755	+	CATGCcc	(Motif sequence only)
gene-ASAT1::NC_090811.1:1242156-1244155(-)	TF_motif_seq_0362	RYREPEATLEGUMINBOX	1542	-	atGCATG	(Motif sequence only)
gene-ASAT1::NC_090811.1:1242156-1244155(-)	TF_motif_seq_0362	RYREPEATLEGUMINBOX	1545	+	CATGCat	(Motif sequence only)
gene-ASAT1::NC_090811.1:1242156-1244155(-)	TF_motif_seq_0363	LEAFYATAG	1620	+	CCAATgg	(Motif sequence only)
gene-ASAT1::NC_090811.1:1242156-1244155(-)	TF_motif_seq_0364	AMMORESIVDCRNIA1	160	+	TGAACtt	(Motif sequence only)
gene-ASAT1::NC_090811.1:1242156-1244155(-)	TF_motif_seq_0364	AMMORESIVDCRNIA1	511	-	aaGTTCA	(Motif sequence only)
gene-ASAT1::NC_090811.1:1242156-1244155(-)	TF_motif_seq_0364	AMMORESIVDCRNIA1	556	+	CTAACtt	(Motif sequence only)
gene-ASAT1::NC_090811.1:1242156-1244155(-)	TF_motif_seq_0364	AMMORESIVDCRNIA1	1754	+	CGCACtt	(Motif sequence only)
gene-ASAT1::NC_090811.1:1242156-1244155(-)	TF_motif_seq_0364	AMMORESIVDCRNIA1	1833	+	CGATCtt	(Motif sequence only)
gene-ASAT1::NC_090811.1:1242156-1244155(-)	TF_motif_seq_0366	MYBATRD22	171	-	ttGTTAG	(Motif sequence only)
gene-ASAT1::NC_090811.1:1242156-1244155(-)	TF_motif_seq_0370	EECCRCAH1	383	-	ggAACTC	(Motif sequence only)
gene-ASAT1::NC_090811.1:1242156-1244155(-)	TF_motif_seq_0370	EECCRCAH1	524	-	gaAAATC	(Motif sequence only)
gene-ASAT1::NC_090811.1:1242156-1244155(-)	TF_motif_seq_0371	IBOXCORENT	119	-	acTTATC	(Motif sequence only)
gene-ASAT1::NC_090811.1:1242156-1244155(-)	TF_motif_seq_0371	IBOXCORENT	410	-	ttTTATC	(Motif sequence only)
gene-ASAT1::NC_090811.1:1242156-1244155(-)	TF_motif_seq_0371	IBOXCORENT	731	+	GATAAca	(Motif sequence only)
gene-ASAT1::NC_090811.1:1242156-1244155(-)	TF_motif_seq_0371	IBOXCORENT	992	-	ctTTATC	(Motif sequence only)
gene-ASAT1::NC_090811.1:1242156-1244155(-)	TF_motif_seq_0371	IBOXCORENT	1039	+	GATAAtg	(Motif sequence only)
gene-ASAT1::NC_090811.1:1242156-1244155(-)	TF_motif_seq_0371	IBOXCORENT	1111	+	GATAAaa	(Motif sequence only)
gene-ASAT1::NC_090811.1:1242156-1244155(-)	TF_motif_seq_0371	IBOXCORENT	1405	-	ttTTATC	(Motif sequence only)
gene-ASAT1::NC_090811.1:1242156-1244155(-)	TF_motif_seq_0371	IBOXCORENT	1626	+	GATAAaa	(Motif sequence only)
gene-ASAT1::NC_090811.1:1242156-1244155(-)	TF_motif_seq_0372	ACGTOSGLUB1	1748	-	caCGCAC	(Motif sequence only)
gene-ASAT1::NC_090811.1:1242156-1244155(-)	TF_motif_seq_0372	ACGTOSGLUB1	1752	-	caCGCAC	(Motif sequence only)
gene-ASAT1::NC_090811.1:1242156-1244155(-)	TF_motif_seq_0373	MYB1LEPR	173	+	GTTAGtg	(Motif sequence only)
gene-ASAT1::NC_090811.1:1242156-1244155(-)	TF_motif_seq_0373	MYB1LEPR	554	-	acCTAAC	(Motif sequence only)
gene-ASAT1::NC_090811.1:1242156-1244155(-)	TF_motif_seq_0375	SEF4MOTIFGM7S	1303	+	aTTTTTa	(Motif sequence only)
gene-ASAT1::NC_090811.1:1242156-1244155(-)	TF_motif_seq_0377	GAREAT	18	-	gtTGTTA	(Motif sequence only)
gene-ASAT1::NC_090811.1:1242156-1244155(-)	TF_motif_seq_0377	GAREAT	170	-	ttTGTTA	(Motif sequence only)
gene-ASAT1::NC_090811.1:1242156-1244155(-)	TF_motif_seq_0377	GAREAT	415	-	tcTGTTA	(Motif sequence only)
gene-ASAT1::NC_090811.1:1242156-1244155(-)	TF_motif_seq_0377	GAREAT	733	+	TAACAat	(Motif sequence only)
gene-ASAT1::NC_090811.1:1242156-1244155(-)	TF_motif_seq_0377	GAREAT	1023	-	ttTGTTA	(Motif sequence only)
gene-ASAT1::NC_090811.1:1242156-1244155(-)	TF_motif_seq_0377	GAREAT	1361	+	TAACAtg	(Motif sequence only)
gene-ASAT1::NC_090811.1:1242156-1244155(-)	TF_motif_seq_0377	GAREAT	1584	+	TAACAat	(Motif sequence only)
gene-ASAT1::NC_090811.1:1242156-1244155(-)	TF_motif_seq_0377	GAREAT	1715	+	TAACAta	(Motif sequence only)
gene-ASAT1::NC_090811.1:1242156-1244155(-)	TF_motif_seq_0378	GARE1OSREP1	170	-	ttTGTTA	(Motif sequence only)
gene-ASAT1::NC_090811.1:1242156-1244155(-)	TF_motif_seq_0378	GARE1OSREP1	415	-	tcTGTTA	(Motif sequence only)
gene-ASAT1::NC_090811.1:1242156-1244155(-)	TF_motif_seq_0378	GARE1OSREP1	1023	-	ttTGTTA	(Motif sequence only)
gene-ASAT1::NC_090811.1:1242156-1244155(-)	TF_motif_seq_0378	GARE1OSREP1	1715	+	TAACAta	(Motif sequence only)
gene-ASAT1::NC_090811.1:1242156-1244155(-)	TF_motif_seq_0380	GARE2OSREP1	373	-	taCGTTC	(Motif sequence only)
gene-ASAT1::NC_090811.1:1242156-1244155(-)	TF_motif_seq_0380	GARE2OSREP1	920	+	TAACTta	(Motif sequence only)
gene-ASAT1::NC_090811.1:1242156-1244155(-)	TF_motif_seq_0380	GARE2OSREP1	1028	-	taCATTA	(Motif sequence only)
gene-ASAT1::NC_090811.1:1242156-1244155(-)	TF_motif_seq_0380	GARE2OSREP1	1337	-	taGGTTA	(Motif sequence only)
gene-ASAT1::NC_090811.1:1242156-1244155(-)	TF_motif_seq_0380	GARE2OSREP1	1516	+	TAACGaa	(Motif sequence only)
gene-ASAT1::NC_090811.1:1242156-1244155(-)	TF_motif_seq_0380	GARE2OSREP1	1715	+	TAACAta	(Motif sequence only)
gene-ASAT1::NC_090811.1:1242156-1244155(-)	TF_motif_seq_0382	SP8BFIBSP8BIB	1922	-	acTAGTA	(Motif sequence only)
gene-ASAT1::NC_090811.1:1242156-1244155(-)	TF_motif_seq_0383	TATABOX2	335	-	ctTTATA	(Motif sequence only)
gene-ASAT1::NC_090811.1:1242156-1244155(-)	TF_motif_seq_0383	TATABOX2	440	+	TATAAat	(Motif sequence only)
gene-ASAT1::NC_090811.1:1242156-1244155(-)	TF_motif_seq_0383	TATABOX2	819	-	ttTTATA	(Motif sequence only)
gene-ASAT1::NC_090811.1:1242156-1244155(-)	TF_motif_seq_0383	TATABOX2	1148	-	aaTTATA	(Motif sequence only)
gene-ASAT1::NC_090811.1:1242156-1244155(-)	TF_motif_seq_0383	TATABOX2	1279	-	atTTATA	(Motif sequence only)
gene-ASAT1::NC_090811.1:1242156-1244155(-)	TF_motif_seq_0383	TATABOX2	1282	+	TATAAaa	(Motif sequence only)
gene-ASAT1::NC_090811.1:1242156-1244155(-)	TF_motif_seq_0383	TATABOX2	1565	-	agTTATA	(Motif sequence only)
gene-ASAT1::NC_090811.1:1242156-1244155(-)	TF_motif_seq_0383	TATABOX2	1579	-	atTTATA	(Motif sequence only)
gene-ASAT1::NC_090811.1:1242156-1244155(-)	TF_motif_seq_0384	TATABOX4	337	-	ttATATA	(Motif sequence only)
gene-ASAT1::NC_090811.1:1242156-1244155(-)	TF_motif_seq_0384	TATABOX4	338	+	TATATac	(Motif sequence only)
gene-ASAT1::NC_090811.1:1242156-1244155(-)	TF_motif_seq_0384	TATABOX4	419	-	ttATATA	(Motif sequence only)
gene-ASAT1::NC_090811.1:1242156-1244155(-)	TF_motif_seq_0384	TATABOX4	420	+	TATATat	(Motif sequence only)
gene-ASAT1::NC_090811.1:1242156-1244155(-)	TF_motif_seq_0384	TATABOX4	883	-	atATATA	(Motif sequence only)
gene-ASAT1::NC_090811.1:1242156-1244155(-)	TF_motif_seq_0384	TATABOX4	884	+	TATATaa	(Motif sequence only)
gene-ASAT1::NC_090811.1:1242156-1244155(-)	TF_motif_seq_0384	TATABOX4	1089	-	atATATA	(Motif sequence only)
gene-ASAT1::NC_090811.1:1242156-1244155(-)	TF_motif_seq_0384	TATABOX4	1090	+	TATATag	(Motif sequence only)
gene-ASAT1::NC_090811.1:1242156-1244155(-)	TF_motif_seq_0384	TATABOX4	1892	-	atATATA	(Motif sequence only)
gene-ASAT1::NC_090811.1:1242156-1244155(-)	TF_motif_seq_0384	TATABOX4	1893	+	TATATac	(Motif sequence only)
gene-ASAT1::NC_090811.1:1242156-1244155(-)	TF_motif_seq_0384	TATABOX4	1926	-	gtATATA	(Motif sequence only)
gene-ASAT1::NC_090811.1:1242156-1244155(-)	TF_motif_seq_0384	TATABOX4	1927	+	TATATat	(Motif sequence only)
gene-ASAT1::NC_090811.1:1242156-1244155(-)	TF_motif_seq_0384	TATABOX4	1928	-	atATATA	(Motif sequence only)
gene-ASAT1::NC_090811.1:1242156-1244155(-)	TF_motif_seq_0384	TATABOX4	1929	+	TATATac	(Motif sequence only)
gene-ASAT1::NC_090811.1:1242156-1244155(-)	TF_motif_seq_0385	TATCCACHVAL21	1623	-	atGGATA	(Motif sequence only)
gene-ASAT1::NC_090811.1:1242156-1244155(-)	TF_motif_seq_0385	TATCCACHVAL21	1810	-	ctGGATA	(Motif sequence only)
gene-ASAT1::NC_090811.1:1242156-1244155(-)	TF_motif_seq_0385	TATCCACHVAL21	1821	+	TATCCac	(Motif sequence only)
gene-ASAT1::NC_090811.1:1242156-1244155(-)	TF_motif_seq_0387	TATCCAYMOTIFOSRAMY3D	1174	-	aaGGATA	(Motif sequence only)
gene-ASAT1::NC_090811.1:1242156-1244155(-)	TF_motif_seq_0387	TATCCAYMOTIFOSRAMY3D	1623	-	atGGATA	(Motif sequence only)
gene-ASAT1::NC_090811.1:1242156-1244155(-)	TF_motif_seq_0387	TATCCAYMOTIFOSRAMY3D	1810	-	ctGGATA	(Motif sequence only)
gene-ASAT1::NC_090811.1:1242156-1244155(-)	TF_motif_seq_0387	TATCCAYMOTIFOSRAMY3D	1821	+	TATCCac	(Motif sequence only)
gene-ASAT1::NC_090811.1:1242156-1244155(-)	TF_motif_seq_0388	TATABOX3	275	-	ttTAATA	(Motif sequence only)
gene-ASAT1::NC_090811.1:1242156-1244155(-)	TF_motif_seq_0388	TATABOX3	305	-	aaTAATA	(Motif sequence only)
gene-ASAT1::NC_090811.1:1242156-1244155(-)	TF_motif_seq_0388	TATABOX3	446	+	TATTAaa	(Motif sequence only)
gene-ASAT1::NC_090811.1:1242156-1244155(-)	TF_motif_seq_0388	TATABOX3	983	+	TATTAat	(Motif sequence only)
gene-ASAT1::NC_090811.1:1242156-1244155(-)	TF_motif_seq_0388	TATABOX3	1588	-	aaTAATA	(Motif sequence only)
gene-ASAT1::NC_090811.1:1242156-1244155(-)	TF_motif_seq_0389	TATABOXOSPAL	2	+	TATTTaa	(Motif sequence only)
gene-ASAT1::NC_090811.1:1242156-1244155(-)	TF_motif_seq_0389	TATABOXOSPAL	99	+	TATTTaa	(Motif sequence only)
gene-ASAT1::NC_090811.1:1242156-1244155(-)	TF_motif_seq_0389	TATABOXOSPAL	232	-	ttAAATA	(Motif sequence only)
gene-ASAT1::NC_090811.1:1242156-1244155(-)	TF_motif_seq_0389	TATABOXOSPAL	424	+	TATTTca	(Motif sequence only)
gene-ASAT1::NC_090811.1:1242156-1244155(-)	TF_motif_seq_0389	TATABOXOSPAL	431	-	ctAAATA	(Motif sequence only)
gene-ASAT1::NC_090811.1:1242156-1244155(-)	TF_motif_seq_0389	TATABOXOSPAL	441	-	atAAATA	(Motif sequence only)
gene-ASAT1::NC_090811.1:1242156-1244155(-)	TF_motif_seq_0389	TATABOXOSPAL	824	+	TATTTta	(Motif sequence only)
gene-ASAT1::NC_090811.1:1242156-1244155(-)	TF_motif_seq_0389	TATABOXOSPAL	1070	+	TATTTta	(Motif sequence only)
gene-ASAT1::NC_090811.1:1242156-1244155(-)	TF_motif_seq_0389	TATABOXOSPAL	1342	+	TATTTaa	(Motif sequence only)
gene-ASAT1::NC_090811.1:1242156-1244155(-)	TF_motif_seq_0389	TATABOXOSPAL	1420	-	ttAAATA	(Motif sequence only)
gene-ASAT1::NC_090811.1:1242156-1244155(-)	TF_motif_seq_0389	TATABOXOSPAL	1424	-	atAAATA	(Motif sequence only)
gene-ASAT1::NC_090811.1:1242156-1244155(-)	TF_motif_seq_0389	TATABOXOSPAL	1502	+	TATTTac	(Motif sequence only)
gene-ASAT1::NC_090811.1:1242156-1244155(-)	TF_motif_seq_0389	TATABOXOSPAL	1573	-	ttAAATA	(Motif sequence only)
gene-ASAT1::NC_090811.1:1242156-1244155(-)	TF_motif_seq_0389	TATABOXOSPAL	1578	+	TATTTat	(Motif sequence only)
gene-ASAT1::NC_090811.1:1242156-1244155(-)	TF_motif_seq_0389	TATABOXOSPAL	1609	-	atAAATA	(Motif sequence only)
gene-ASAT1::NC_090811.1:1242156-1244155(-)	TF_motif_seq_0389	TATABOXOSPAL	1979	+	TATTTca	(Motif sequence only)
gene-ASAT1::NC_090811.1:1242156-1244155(-)	TF_motif_seq_0390	ANAERO3CONSENSUS	1656	-	gaGATGA	(Motif sequence only)
gene-ASAT1::NC_090811.1:1242156-1244155(-)	TF_motif_seq_0390	ANAERO3CONSENSUS	1936	-	atGATGA	(Motif sequence only)
gene-ASAT1::NC_090811.1:1242156-1244155(-)	TF_motif_seq_0391	GCN4OSGLUB1	916	+	TGAGTaa	(Motif sequence only)
gene-ASAT1::NC_090811.1:1242156-1244155(-)	TF_motif_seq_0391	GCN4OSGLUB1	1940	+	TGAGTta	(Motif sequence only)
gene-ASAT1::NC_090811.1:1242156-1244155(-)	TF_motif_seq_0392	PROLAMINBOXOSGLUB1	1647	-	ctTTGCA	(Motif sequence only)
gene-ASAT1::NC_090811.1:1242156-1244155(-)	TF_motif_seq_0392	PROLAMINBOXOSGLUB1	1954	-	caTTGCA	(Motif sequence only)
gene-ASAT1::NC_090811.1:1242156-1244155(-)	TF_motif_seq_0395	TGTCACACMCUCUMISIN	141	+	TGTCAaa	(Motif sequence only)
gene-ASAT1::NC_090811.1:1242156-1244155(-)	TF_motif_seq_0395	TGTCACACMCUCUMISIN	259	-	ttTGACA	(Motif sequence only)
gene-ASAT1::NC_090811.1:1242156-1244155(-)	TF_motif_seq_0395	TGTCACACMCUCUMISIN	791	+	TGTCAct	(Motif sequence only)
gene-ASAT1::NC_090811.1:1242156-1244155(-)	TF_motif_seq_0395	TGTCACACMCUCUMISIN	1181	+	TGTCAga	(Motif sequence only)
gene-ASAT1::NC_090811.1:1242156-1244155(-)	TF_motif_seq_0397	WUSATAg	5	+	TTAATgt	(Motif sequence only)
gene-ASAT1::NC_090811.1:1242156-1244155(-)	TF_motif_seq_0397	WUSATAg	287	-	cgATTAA	(Motif sequence only)
gene-ASAT1::NC_090811.1:1242156-1244155(-)	TF_motif_seq_0397	WUSATAg	1161	+	TTAATtg	(Motif sequence only)
gene-ASAT1::NC_090811.1:1242156-1244155(-)	TF_motif_seq_0397	WUSATAg	1536	-	tcATTAA	(Motif sequence only)
gene-ASAT1::NC_090811.1:1242156-1244155(-)	TF_motif_seq_0397	WUSATAg	1539	+	TTAATgc	(Motif sequence only)
gene-ASAT1::NC_090811.1:1242156-1244155(-)	TF_motif_seq_0397	WUSATAg	1555	+	TTAATcg	(Motif sequence only)
gene-ASAT1::NC_090811.1:1242156-1244155(-)	TF_motif_seq_0399	WBBOXPCWRKY1	141	-	tgTCAAA	(Motif sequence only)
gene-ASAT1::NC_090811.1:1242156-1244155(-)	TF_motif_seq_0399	WBBOXPCWRKY1	259	+	TTTGAca	(Motif sequence only)
gene-ASAT1::NC_090811.1:1242156-1244155(-)	TF_motif_seq_0399	WBBOXPCWRKY1	301	+	TTTGAat	(Motif sequence only)
gene-ASAT1::NC_090811.1:1242156-1244155(-)	TF_motif_seq_0399	WBBOXPCWRKY1	513	-	gtTCAAA	(Motif sequence only)
gene-ASAT1::NC_090811.1:1242156-1244155(-)	TF_motif_seq_0399	WBBOXPCWRKY1	841	-	atTCAAA	(Motif sequence only)
gene-ASAT1::NC_090811.1:1242156-1244155(-)	TF_motif_seq_0399	WBBOXPCWRKY1	1522	-	atTCAAA	(Motif sequence only)
gene-ASAT1::NC_090811.1:1242156-1244155(-)	TF_motif_seq_0400	MRNASTA2CRPSBD	384	-	gaACTCA	(Motif sequence only)
gene-ASAT1::NC_090811.1:1242156-1244155(-)	TF_motif_seq_0400	MRNASTA2CRPSBD	568	-	ccACTCA	(Motif sequence only)
gene-ASAT1::NC_090811.1:1242156-1244155(-)	TF_motif_seq_0400	MRNASTA2CRPSBD	1940	+	TGAGTta	(Motif sequence only)
gene-ASAT1::NC_090811.1:1242156-1244155(-)	TF_motif_seq_0401	SEBFCONSSTPR10A	45	-	gaGACAA	(Motif sequence only)
gene-ASAT1::NC_090811.1:1242156-1244155(-)	TF_motif_seq_0401	SEBFCONSSTPR10A	722	-	gaGACAA	(Motif sequence only)
gene-ASAT1::NC_090811.1:1242156-1244155(-)	TF_motif_seq_0401	SEBFCONSSTPR10A	790	+	TTGTCac	(Motif sequence only)
gene-ASAT1::NC_090811.1:1242156-1244155(-)	TF_motif_seq_0403	CCA1ATLHCB1	949	-	AGATTttt	(Motif sequence only)
gene-ASAT1::NC_090811.1:1242156-1244155(-)	TF_motif_seq_0404	XYLAT	202	-	ttgTTTGT	(Motif sequence only)
gene-ASAT1::NC_090811.1:1242156-1244155(-)	TF_motif_seq_0404	XYLAT	347	+	ACAAAgca	(Motif sequence only)
gene-ASAT1::NC_090811.1:1242156-1244155(-)	TF_motif_seq_0404	XYLAT	786	-	tttTTTGT	(Motif sequence only)
gene-ASAT1::NC_090811.1:1242156-1244155(-)	TF_motif_seq_0407	SP8BFIBSP8AIB	27	+	CCTGTgga	(Motif sequence only)
gene-ASAT1::NC_090811.1:1242156-1244155(-)	TF_motif_seq_0407	SP8BFIBSP8AIB	51	+	ACTGTaca	(Motif sequence only)
gene-ASAT1::NC_090811.1:1242156-1244155(-)	TF_motif_seq_0407	SP8BFIBSP8AIB	112	+	ACTGAtta	(Motif sequence only)
gene-ASAT1::NC_090811.1:1242156-1244155(-)	TF_motif_seq_0407	SP8BFIBSP8AIB	266	+	ACTCTtta	(Motif sequence only)
gene-ASAT1::NC_090811.1:1242156-1244155(-)	TF_motif_seq_0407	SP8BFIBSP8AIB	569	-	cacTCAGT	(Motif sequence only)
gene-ASAT1::NC_090811.1:1242156-1244155(-)	TF_motif_seq_0407	SP8BFIBSP8AIB	674	-	ttcACATT	(Motif sequence only)
gene-ASAT1::NC_090811.1:1242156-1244155(-)	TF_motif_seq_0407	SP8BFIBSP8AIB	834	+	TCTGTtta	(Motif sequence only)
gene-ASAT1::NC_090811.1:1242156-1244155(-)	TF_motif_seq_0407	SP8BFIBSP8AIB	1117	+	ATTGTgtg	(Motif sequence only)
gene-ASAT1::NC_090811.1:1242156-1244155(-)	TF_motif_seq_0407	SP8BFIBSP8AIB	1268	+	GCTGTgtg	(Motif sequence only)
gene-ASAT1::NC_090811.1:1242156-1244155(-)	TF_motif_seq_0407	SP8BFIBSP8AIB	1429	-	tacATAGT	(Motif sequence only)
gene-ASAT1::NC_090811.1:1242156-1244155(-)	TF_motif_seq_0407	SP8BFIBSP8AIB	1593	-	taaACACT	(Motif sequence only)
gene-ASAT1::NC_090811.1:1242156-1244155(-)	TF_motif_seq_0407	SP8BFIBSP8AIB	1597	-	cacTCAGT	(Motif sequence only)
gene-ASAT1::NC_090811.1:1242156-1244155(-)	TF_motif_seq_0407	SP8BFIBSP8AIB	1602	+	AGTGTgaa	(Motif sequence only)
gene-ASAT1::NC_090811.1:1242156-1244155(-)	TF_motif_seq_0407	SP8BFIBSP8AIB	1646	+	ACTTTgca	(Motif sequence only)
gene-ASAT1::NC_090811.1:1242156-1244155(-)	TF_motif_seq_0407	SP8BFIBSP8AIB	1706	-	ttcACATT	(Motif sequence only)
gene-ASAT1::NC_090811.1:1242156-1244155(-)	TF_motif_seq_0407	SP8BFIBSP8AIB	1727	+	ACTCTata	(Motif sequence only)
gene-ASAT1::NC_090811.1:1242156-1244155(-)	TF_motif_seq_0407	SP8BFIBSP8AIB	1737	-	gacACAGC	(Motif sequence only)
gene-ASAT1::NC_090811.1:1242156-1244155(-)	TF_motif_seq_0407	SP8BFIBSP8AIB	1809	+	ACTGGata	(Motif sequence only)
gene-ASAT1::NC_090811.1:1242156-1244155(-)	TF_motif_seq_0408	AGMOTIFNTMYB2	354	+	AGATCcac	(Motif sequence only)
gene-ASAT1::NC_090811.1:1242156-1244155(-)	TF_motif_seq_0409	TRANSINITDICOTS	1889	-	GCCATata	(Motif sequence only)
gene-ASAT1::NC_090811.1:1242156-1244155(-)	TF_motif_seq_0412	TE2F2NTPCNA	24	+	ATTCCtgt	(Motif sequence only)
gene-ASAT1::NC_090811.1:1242156-1244155(-)	TF_motif_seq_0412	TE2F2NTPCNA	775	-	cggGGAAT	(Motif sequence only)
gene-ASAT1::NC_090811.1:1242156-1244155(-)	TF_motif_seq_0412	TE2F2NTPCNA	1846	-	aggGGAAT	(Motif sequence only)
gene-ASAT1::NC_090811.1:1242156-1244155(-)	TF_motif_seq_0413	PE2FNTRNR1A	470	+	ATTAGcac	(Motif sequence only)
gene-ASAT1::NC_090811.1:1242156-1244155(-)	TF_motif_seq_0413	PE2FNTRNR1A	498	-	tccCGAAT	(Motif sequence only)
gene-ASAT1::NC_090811.1:1242156-1244155(-)	TF_motif_seq_0413	PE2FNTRNR1A	1056	-	gtgCTAAT	(Motif sequence only)
gene-ASAT1::NC_090811.1:1242156-1244155(-)	TF_motif_seq_0413	PE2FNTRNR1A	1603	-	gtgTGAAT	(Motif sequence only)
gene-ASAT1::NC_090811.1:1242156-1244155(-)	TF_motif_seq_0414	ERELEE4	301	-	tTTGAAta	(Motif sequence only)
gene-ASAT1::NC_090811.1:1242156-1244155(-)	TF_motif_seq_0414	ERELEE4	512	+	agTTCAAa	(Motif sequence only)
gene-ASAT1::NC_090811.1:1242156-1244155(-)	TF_motif_seq_0414	ERELEE4	840	+	taTTCAAa	(Motif sequence only)
gene-ASAT1::NC_090811.1:1242156-1244155(-)	TF_motif_seq_0414	ERELEE4	1521	+	aaTTCAAa	(Motif sequence only)
gene-ASAT1::NC_090811.1:1242156-1244155(-)	TF_motif_seq_0414	ERELEE4	1914	+	atTTCAAg	(Motif sequence only)
gene-ASAT1::NC_090811.1:1242156-1244155(-)	TF_motif_seq_0416	PROXBBNNAPA	1323	+	CAAACtcc	(Motif sequence only)
gene-ASAT1::NC_090811.1:1242156-1244155(-)	TF_motif_seq_0417	SBOXATRBCS	1795	+	CACCTcaa	(Motif sequence only)
gene-ASAT1::NC_090811.1:1242156-1244155(-)	TF_motif_seq_0418	CELLCYCLESC	1051	-	ttgTCGTG	(Motif sequence only)
gene-ASAT1::NC_090811.1:1242156-1244155(-)	TF_motif_seq_0419	CACGCAATGMGH3	1752	+	CACGCact	(Motif sequence only)
gene-ASAT1::NC_090811.1:1242156-1244155(-)	TF_motif_seq_0425	SITEIOSPCNA	633	-	gcaCCTGT	(Motif sequence only)
gene-ASAT1::NC_090811.1:1242156-1244155(-)	TF_motif_seq_0425	SITEIOSPCNA	701	+	CAAGGttg	(Motif sequence only)
gene-ASAT1::NC_090811.1:1242156-1244155(-)	TF_motif_seq_0425	SITEIOSPCNA	1824	-	ccaCCTAG	(Motif sequence only)
gene-ASAT1::NC_090811.1:1242156-1244155(-)	TF_motif_seq_0425	SITEIOSPCNA	1857	-	tcaCCTAG	(Motif sequence only)
gene-ASAT1::NC_090811.1:1242156-1244155(-)	TF_motif_seq_0427	OCTAMOTIF2	1077	+	CGCGGccc	(Motif sequence only)
gene-ASAT1::NC_090811.1:1242156-1244155(-)	TF_motif_seq_0429	E2F1OSPCNA	774	+	TCGGGgaa	(Motif sequence only)
gene-ASAT1::NC_090811.1:1242156-1244155(-)	TF_motif_seq_0429	E2F1OSPCNA	1366	-	tgtCCCTC	(Motif sequence only)
gene-ASAT1::NC_090811.1:1242156-1244155(-)	TF_motif_seq_0429	E2F1OSPCNA	1745	-	ttgCACGC	(Motif sequence only)
gene-ASAT1::NC_090811.1:1242156-1244155(-)	TF_motif_seq_0429	E2F1OSPCNA	1779	+	ACGGGata	(Motif sequence only)
gene-ASAT1::NC_090811.1:1242156-1244155(-)	TF_motif_seq_0429	E2F1OSPCNA	1845	+	GAGGGgaa	(Motif sequence only)
gene-ASAT1::NC_090811.1:1242156-1244155(-)	TF_motif_seq_0432	GGTCCCATGMSAUR	748	-	ataAGACC	(Motif sequence only)
gene-ASAT1::NC_090811.1:1242156-1244155(-)	TF_motif_seq_0433	AMMORESIIUDCRNIA1	1413	-	ACCCTact	(Motif sequence only)
gene-ASAT1::NC_090811.1:1242156-1244155(-)	TF_motif_seq_0434	P1BS	106	+	GAATAgac	(Motif sequence only)
gene-ASAT1::NC_090811.1:1242156-1244155(-)	TF_motif_seq_0434	P1BS	337	-	ttaTATAC	(Motif sequence only)
gene-ASAT1::NC_090811.1:1242156-1244155(-)	TF_motif_seq_0434	P1BS	669	-	acaTATTC	(Motif sequence only)
gene-ASAT1::NC_090811.1:1242156-1244155(-)	TF_motif_seq_0434	P1BS	811	-	tcaTATGC	(Motif sequence only)
gene-ASAT1::NC_090811.1:1242156-1244155(-)	TF_motif_seq_0434	P1BS	837	-	gttTATTC	(Motif sequence only)
gene-ASAT1::NC_090811.1:1242156-1244155(-)	TF_motif_seq_0434	P1BS	1150	-	ttaTATGC	(Motif sequence only)
gene-ASAT1::NC_090811.1:1242156-1244155(-)	TF_motif_seq_0434	P1BS	1176	+	GGATAtgt	(Motif sequence only)
gene-ASAT1::NC_090811.1:1242156-1244155(-)	TF_motif_seq_0434	P1BS	1762	-	gacTATTC	(Motif sequence only)
gene-ASAT1::NC_090811.1:1242156-1244155(-)	TF_motif_seq_0434	P1BS	1770	-	gacTATTC	(Motif sequence only)
gene-ASAT1::NC_090811.1:1242156-1244155(-)	TF_motif_seq_0434	P1BS	1892	-	ataTATAC	(Motif sequence only)
gene-ASAT1::NC_090811.1:1242156-1244155(-)	TF_motif_seq_0434	P1BS	1926	+	GTATAtat	(Motif sequence only)
gene-ASAT1::NC_090811.1:1242156-1244155(-)	TF_motif_seq_0434	P1BS	1928	-	ataTATAC	(Motif sequence only)
gene-ASAT1::NC_090811.1:1242156-1244155(-)	TF_motif_seq_0435	PIATGAPB	120	-	cttATCAC	(Motif sequence only)
gene-ASAT1::NC_090811.1:1242156-1244155(-)	TF_motif_seq_0435	PIATGAPB	575	+	GTGATaaa	(Motif sequence only)
gene-ASAT1::NC_090811.1:1242156-1244155(-)	TF_motif_seq_0435	PIATGAPB	1122	+	GTGATaat	(Motif sequence only)
gene-ASAT1::NC_090811.1:1242156-1244155(-)	TF_motif_seq_0435	PIATGAPB	1297	+	GTGATtat	(Motif sequence only)
gene-ASAT1::NC_090811.1:1242156-1244155(-)	TF_motif_seq_0435	PIATGAPB	1790	-	atgATCAC	(Motif sequence only)
gene-ASAT1::NC_090811.1:1242156-1244155(-)	TF_motif_seq_0435	PIATGAPB	1853	-	ttaATCAC	(Motif sequence only)
gene-ASAT1::NC_090811.1:1242156-1244155(-)	TF_motif_seq_0437	SV40COREENHAN	1820	-	ctaTCCAC	(Motif sequence only)
gene-ASAT1::NC_090811.1:1242156-1244155(-)	TF_motif_seq_0438	MYB26PS	553	-	tacCTAAC	(Motif sequence only)
gene-ASAT1::NC_090811.1:1242156-1244155(-)	TF_motif_seq_0443	LECPLEACS2	145	-	aaaTTTTA	(Motif sequence only)
gene-ASAT1::NC_090811.1:1242156-1244155(-)	TF_motif_seq_0443	LECPLEACS2	823	-	ataTTTTA	(Motif sequence only)
gene-ASAT1::NC_090811.1:1242156-1244155(-)	TF_motif_seq_0443	LECPLEACS2	1069	-	ctaTTTTA	(Motif sequence only)
gene-ASAT1::NC_090811.1:1242156-1244155(-)	TF_motif_seq_0445	L1BOXATPDF1	97	-	tgtATTTA	(Motif sequence only)
gene-ASAT1::NC_090811.1:1242156-1244155(-)	TF_motif_seq_0445	L1BOXATPDF1	1425	+	TAAATaca	(Motif sequence only)
gene-ASAT1::NC_090811.1:1242156-1244155(-)	TF_motif_seq_0447	NRRBNEXTA	175	+	TAGTGcat	(Motif sequence only)
gene-ASAT1::NC_090811.1:1242156-1244155(-)	TF_motif_seq_0447	NRRBNEXTA	462	+	TAGTGgtt	(Motif sequence only)
gene-ASAT1::NC_090811.1:1242156-1244155(-)	TF_motif_seq_0447	NRRBNEXTA	652	+	TAGTGaat	(Motif sequence only)
gene-ASAT1::NC_090811.1:1242156-1244155(-)	TF_motif_seq_0448	CEREGLUBOX2PSLEGA	902	+	TGAAAaca	(Motif sequence only)
gene-ASAT1::NC_090811.1:1242156-1244155(-)	TF_motif_seq_0448	CEREGLUBOX2PSLEGA	938	-	attTTTCA	(Motif sequence only)
gene-ASAT1::NC_090811.1:1242156-1244155(-)	TF_motif_seq_0448	CEREGLUBOX2PSLEGA	1531	-	attTTTCA	(Motif sequence only)
gene-ASAT1::NC_090811.1:1242156-1244155(-)	TF_motif_seq_0449	AUXRETGA1GMGH3	73	+	TGAAGcaa	(Motif sequence only)
gene-ASAT1::NC_090811.1:1242156-1244155(-)	TF_motif_seq_0449	AUXRETGA1GMGH3	138	-	ttgTGTCA	(Motif sequence only)
gene-ASAT1::NC_090811.1:1242156-1244155(-)	TF_motif_seq_0449	AUXRETGA1GMGH3	788	-	tttTGTCA	(Motif sequence only)
gene-ASAT1::NC_090811.1:1242156-1244155(-)	TF_motif_seq_0449	AUXRETGA1GMGH3	1178	-	ataTGTCA	(Motif sequence only)
gene-ASAT1::NC_090811.1:1242156-1244155(-)	TF_motif_seq_0449	AUXRETGA1GMGH3	1505	-	ttaCATCA	(Motif sequence only)
gene-ASAT1::NC_090811.1:1242156-1244155(-)	TF_motif_seq_0449	AUXRETGA1GMGH3	1794	-	tcaCCTCA	(Motif sequence only)
gene-ASAT1::NC_090811.1:1242156-1244155(-)	TF_motif_seq_0449	AUXRETGA1GMGH3	1839	+	TGACGaga	(Motif sequence only)
gene-ASAT1::NC_090811.1:1242156-1244155(-)	TF_motif_seq_0449	AUXRETGA1GMGH3	1872	-	tttCGTCT	(Motif sequence only)
gene-ASAT1::NC_090811.1:1242156-1244155(-)	TF_motif_seq_0450	PALINDROMICCBOXGM	479	-	cgaGGTCA	(Motif sequence only)
gene-ASAT1::NC_090811.1:1242156-1244155(-)	TF_motif_seq_0450	PALINDROMICCBOXGM	1137	+	TGAAGtcg	(Motif sequence only)
gene-ASAT1::NC_090811.1:1242156-1244155(-)	TF_motif_seq_0450	PALINDROMICCBOXGM	1272	-	tgtGGTCA	(Motif sequence only)
gene-ASAT1::NC_090811.1:1242156-1244155(-)	TF_motif_seq_0450	PALINDROMICCBOXGM	1505	-	ttaCATCA	(Motif sequence only)
gene-ASAT1::NC_090811.1:1242156-1244155(-)	TF_motif_seq_0450	PALINDROMICCBOXGM	1794	-	tcaCCTCA	(Motif sequence only)
gene-ASAT1::NC_090811.1:1242156-1244155(-)	TF_motif_seq_0450	PALINDROMICCBOXGM	1839	+	TGACGaga	(Motif sequence only)
gene-ASAT1::NC_090811.1:1242156-1244155(-)	TF_motif_seq_0452	-300ELEMENT	560	-	cttTTTCA	(Motif sequence only)
gene-ASAT1::NC_090811.1:1242156-1244155(-)	TF_motif_seq_0452	-300ELEMENT	938	-	attTTTCA	(Motif sequence only)
gene-ASAT1::NC_090811.1:1242156-1244155(-)	TF_motif_seq_0452	-300ELEMENT	1531	-	attTTTCA	(Motif sequence only)
gene-ASAT1::NC_090811.1:1242156-1244155(-)	TF_motif_seq_0452	-300ELEMENT	1646	-	actTTGCA	(Motif sequence only)
gene-ASAT1::NC_090811.1:1242156-1244155(-)	TF_motif_seq_0453	EMHVCHORD	279	-	ataTTACA	(Motif sequence only)
gene-ASAT1::NC_090811.1:1242156-1244155(-)	TF_motif_seq_0453	EMHVCHORD	364	+	TGTAAgct	(Motif sequence only)
gene-ASAT1::NC_090811.1:1242156-1244155(-)	TF_motif_seq_0453	EMHVCHORD	1502	-	tatTTACA	(Motif sequence only)
gene-ASAT1::NC_090811.1:1242156-1244155(-)	TF_motif_seq_0454	TATAPVTRNALEU	233	-	taaATAAA	(Motif sequence only)
gene-ASAT1::NC_090811.1:1242156-1244155(-)	TF_motif_seq_0454	TATAPVTRNALEU	336	+	TTTATata	(Motif sequence only)
gene-ASAT1::NC_090811.1:1242156-1244155(-)	TF_motif_seq_0454	TATAPVTRNALEU	438	-	tgtATAAA	(Motif sequence only)
gene-ASAT1::NC_090811.1:1242156-1244155(-)	TF_motif_seq_0454	TATAPVTRNALEU	820	+	TTTATatt	(Motif sequence only)
gene-ASAT1::NC_090811.1:1242156-1244155(-)	TF_motif_seq_0454	TATAPVTRNALEU	1280	+	TTTATaaa	(Motif sequence only)
gene-ASAT1::NC_090811.1:1242156-1244155(-)	TF_motif_seq_0454	TATAPVTRNALEU	1280	-	tttATAAA	(Motif sequence only)
gene-ASAT1::NC_090811.1:1242156-1244155(-)	TF_motif_seq_0454	TATAPVTRNALEU	1406	+	TTTATcta	(Motif sequence only)
gene-ASAT1::NC_090811.1:1242156-1244155(-)	TF_motif_seq_0454	TATAPVTRNALEU	1421	-	taaATAAA	(Motif sequence only)
gene-ASAT1::NC_090811.1:1242156-1244155(-)	TF_motif_seq_0457	PYRIMIDINEBOXHVEPB1	217	+	TTTTTttc	(Motif sequence only)
gene-ASAT1::NC_090811.1:1242156-1244155(-)	TF_motif_seq_0457	PYRIMIDINEBOXHVEPB1	218	+	TTTTTtca	(Motif sequence only)
gene-ASAT1::NC_090811.1:1242156-1244155(-)	TF_motif_seq_0457	PYRIMIDINEBOXHVEPB1	849	-	agaAAAAA	(Motif sequence only)
gene-ASAT1::NC_090811.1:1242156-1244155(-)	TF_motif_seq_0457	PYRIMIDINEBOXHVEPB1	850	-	gaaAAAAA	(Motif sequence only)
gene-ASAT1::NC_090811.1:1242156-1244155(-)	TF_motif_seq_0457	PYRIMIDINEBOXHVEPB1	1456	-	agaAAAAA	(Motif sequence only)
gene-ASAT1::NC_090811.1:1242156-1244155(-)	TF_motif_seq_0458	E2FCONSENSUS	775	-	cgGGGAAt	(Motif sequence only)
gene-ASAT1::NC_090811.1:1242156-1244155(-)	TF_motif_seq_0458	E2FCONSENSUS	1846	-	agGGGAAt	(Motif sequence only)
gene-ASAT1::NC_090811.1:1242156-1244155(-)	TF_motif_seq_0460	INRNTPSADB	222	+	tTCACTtc	(Motif sequence only)
gene-ASAT1::NC_090811.1:1242156-1244155(-)	TF_motif_seq_0460	INRNTPSADB	1798	+	cTCAATcc	(Motif sequence only)
gene-ASAT1::NC_090811.1:1242156-1244155(-)	TF_motif_seq_0463	AAGACGTAGATACL12	1098	+	AAGACgaag	(Motif sequence only)
gene-ASAT1::NC_090811.1:1242156-1244155(-)	TF_motif_seq_0467	NONAMERATH4	354	+	AGATCcacg	(Motif sequence only)
gene-ASAT1::NC_090811.1:1242156-1244155(-)	TF_motif_seq_0467	NONAMERATH4	1830	-	agtcGATCT	(Motif sequence only)
gene-ASAT1::NC_090811.1:1242156-1244155(-)	TF_motif_seq_0469	SEF1MOTIF	430	-	actaAATAT	(Motif sequence only)
gene-ASAT1::NC_090811.1:1242156-1244155(-)	TF_motif_seq_0469	SEF1MOTIF	440	-	tataAATAT	(Motif sequence only)
gene-ASAT1::NC_090811.1:1242156-1244155(-)	TF_motif_seq_0469	SEF1MOTIF	1501	+	ATATTtaca	(Motif sequence only)
gene-ASAT1::NC_090811.1:1242156-1244155(-)	TF_motif_seq_0469	SEF1MOTIF	1572	-	cttaAATAT	(Motif sequence only)
gene-ASAT1::NC_090811.1:1242156-1244155(-)	TF_motif_seq_0469	SEF1MOTIF	1577	+	ATATTtata	(Motif sequence only)
gene-ASAT1::NC_090811.1:1242156-1244155(-)	TF_motif_seq_0469	SEF1MOTIF	1608	-	aataAATAT	(Motif sequence only)
gene-ASAT1::NC_090811.1:1242156-1244155(-)	TF_motif_seq_0485	UP1ATMSD	1080	+	GGCCCaaac	(Motif sequence only)
gene-ASAT1::NC_090811.1:1242156-1244155(-)	TF_motif_seq_0490	ANAERO4CONSENSUS	533	-	ttccAAAAC	(Motif sequence only)
gene-ASAT1::NC_090811.1:1242156-1244155(-)	TF_motif_seq_0506	SORLREP3AT	1928	-	atatATACA	(Motif sequence only)
gene-AT4G05100::NC_003075.7:2616372-2618371(+)	TF_motif_seq_0002	CE3OSOSEM	873	-	aacctGCGTT	(Motif sequence only)
gene-AT4G05100::NC_003075.7:2616372-2618371(+)	TF_motif_seq_0003	WINPSTPIIIK	1019	+	AAGCAgaagg	(Motif sequence only)
gene-AT4G05100::NC_003075.7:2616372-2618371(+)	TF_motif_seq_0003	WINPSTPIIIK	1044	+	AAGAGagagt	(Motif sequence only)
gene-AT4G05100::NC_003075.7:2616372-2618371(+)	TF_motif_seq_0003	WINPSTPIIIK	1545	-	agtgaCGCTT	(Motif sequence only)
gene-AT4G05100::NC_003075.7:2616372-2618371(+)	TF_motif_seq_0004	MARABOX1	810	-	gttatTTATT	(Motif sequence only)
gene-AT4G05100::NC_003075.7:2616372-2618371(+)	TF_motif_seq_0005	MRNA3ENDTAH3	501	+	AATGGaattt	(Motif sequence only)
gene-AT4G05100::NC_003075.7:2616372-2618371(+)	TF_motif_seq_0006	WRECSAA01	385	+	aatGTATCaa	(Motif sequence only)
gene-AT4G05100::NC_003075.7:2616372-2618371(+)	TF_motif_seq_0007	D1GMAUX28	1231	+	ACAGTgttta	(Motif sequence only)
gene-AT4G05100::NC_003075.7:2616372-2618371(+)	TF_motif_seq_0008	GBOXPC	334	-	aactcGTGGT	(Motif sequence only)
gene-AT4G05100::NC_003075.7:2616372-2618371(+)	TF_motif_seq_0009	LS7ATPR1	363	-	tatctGACGT	(Motif sequence only)
gene-AT4G05100::NC_003075.7:2616372-2618371(+)	TF_motif_seq_0009	LS7ATPR1	374	+	ACGCCatgca	(Motif sequence only)
gene-AT4G05100::NC_003075.7:2616372-2618371(+)	TF_motif_seq_0009	LS7ATPR1	1121	-	tcgacGACGT	(Motif sequence only)
gene-AT4G05100::NC_003075.7:2616372-2618371(+)	TF_motif_seq_0009	LS7ATPR1	1776	-	taaatGACTT	(Motif sequence only)
gene-AT4G05100::NC_003075.7:2616372-2618371(+)	TF_motif_seq_0009	LS7ATPR1	1986	+	ACGGCaccga	(Motif sequence only)
gene-AT4G05100::NC_003075.7:2616372-2618371(+)	TF_motif_seq_0013	ABREMOTIFIOSRAB16B	1051	+	AGTACgtggc	(Motif sequence only)
gene-AT4G05100::NC_003075.7:2616372-2618371(+)	TF_motif_seq_0015	CIACADIANLELHC	78	-	gatgcTTTTG	(Motif sequence only)
gene-AT4G05100::NC_003075.7:2616372-2618371(+)	TF_motif_seq_0015	CIACADIANLELHC	1150	-	gattgCATTG	(Motif sequence only)
gene-AT4G05100::NC_003075.7:2616372-2618371(+)	TF_motif_seq_0017	GMHDLGMVSPB	179	+	CATTAactat	(Motif sequence only)
gene-AT4G05100::NC_003075.7:2616372-2618371(+)	TF_motif_seq_0017	GMHDLGMVSPB	742	+	CATTAataaa	(Motif sequence only)
gene-AT4G05100::NC_003075.7:2616372-2618371(+)	TF_motif_seq_0018	UPRE2AT	1050	-	gagtaCGTGG	(Motif sequence only)
gene-AT4G05100::NC_003075.7:2616372-2618371(+)	TF_motif_seq_0024	JASE1ATOPR1	1445	-	tggatTGACG	(Motif sequence only)
gene-AT4G05100::NC_003075.7:2616372-2618371(+)	TF_motif_seq_0024	JASE1ATOPR1	1542	-	ttgagTGACG	(Motif sequence only)
gene-AT4G05100::NC_003075.7:2616372-2618371(+)	TF_motif_seq_0025	TATABOX1	185	+	CTATAattag	(Motif sequence only)
gene-AT4G05100::NC_003075.7:2616372-2618371(+)	TF_motif_seq_0025	TATABOX1	710	-	gaattTATAG	(Motif sequence only)
gene-AT4G05100::NC_003075.7:2616372-2618371(+)	TF_motif_seq_0027	CARGCW8GAT	185	+	CTATAattag	(Motif sequence only)
gene-AT4G05100::NC_003075.7:2616372-2618371(+)	TF_motif_seq_0027	CARGCW8GAT	185	-	ctataATTAG	(Motif sequence only)
gene-AT4G05100::NC_003075.7:2616372-2618371(+)	TF_motif_seq_0029	ACEATCHS	1722	-	ccgaaGTGTC	(Motif sequence only)
gene-AT4G05100::NC_003075.7:2616372-2618371(+)	TF_motif_seq_0029	ACEATCHS	1958	+	GACACgtagc	(Motif sequence only)
gene-AT4G05100::NC_003075.7:2616372-2618371(+)	TF_motif_seq_0031	GCAACREPEATZMZEIN	322	-	gatgaGTTGC	(Motif sequence only)
gene-AT4G05100::NC_003075.7:2616372-2618371(+)	TF_motif_seq_0034	ABRE3HVA22	1051	-	agtacGTGGC	(Motif sequence only)
gene-AT4G05100::NC_003075.7:2616372-2618371(+)	TF_motif_seq_0035	GBOX10NT	1051	-	agtacGTGGC	(Motif sequence only)
gene-AT4G05100::NC_003075.7:2616372-2618371(+)	TF_motif_seq_0036	ACGTROOT1	1051	-	agtacGTGGC	(Motif sequence only)
gene-AT4G05100::NC_003075.7:2616372-2618371(+)	TF_motif_seq_0037	ABREAZMRAB28	1051	-	agtacGTGGC	(Motif sequence only)
gene-AT4G05100::NC_003075.7:2616372-2618371(+)	TF_motif_seq_0041	ACGTSEED3	1052	+	GTACGtggca	(Motif sequence only)
gene-AT4G05100::NC_003075.7:2616372-2618371(+)	TF_motif_seq_0043	ABREATRD22	1052	+	gtACGTGgca	(Motif sequence only)
gene-AT4G05100::NC_003075.7:2616372-2618371(+)	TF_motif_seq_0044	TCA1MOTIF	317	-	gggaaGATGA	(Motif sequence only)
gene-AT4G05100::NC_003075.7:2616372-2618371(+)	TF_motif_seq_0052	LS5ATPR1	547	-	ctcacGTAGA	(Motif sequence only)
gene-AT4G05100::NC_003075.7:2616372-2618371(+)	TF_motif_seq_0053	SORLREP5AT	328	+	TTGCAcaact	(Motif sequence only)
gene-AT4G05100::NC_003075.7:2616372-2618371(+)	TF_motif_seq_0053	SORLREP5AT	375	-	cgccaTGCAA	(Motif sequence only)
gene-AT4G05100::NC_003075.7:2616372-2618371(+)	TF_motif_seq_0053	SORLREP5AT	1152	+	TTGCAttgtt	(Motif sequence only)
gene-AT4G05100::NC_003075.7:2616372-2618371(+)	TF_motif_seq_0054	MARTBOX	1623	-	AAAAAaaaaa	(Motif sequence only)
gene-AT4G05100::NC_003075.7:2616372-2618371(+)	TF_motif_seq_0054	MARTBOX	1624	-	AAAAAaaaaa	(Motif sequence only)
gene-AT4G05100::NC_003075.7:2616372-2618371(+)	TF_motif_seq_0054	MARTBOX	1625	-	AAAAAaaaaa	(Motif sequence only)
gene-AT4G05100::NC_003075.7:2616372-2618371(+)	TF_motif_seq_0054	MARTBOX	1626	-	AAAAAaaaaa	(Motif sequence only)
gene-AT4G05100::NC_003075.7:2616372-2618371(+)	TF_motif_seq_0054	MARTBOX	1627	-	AAAAAaaaaa	(Motif sequence only)
gene-AT4G05100::NC_003075.7:2616372-2618371(+)	TF_motif_seq_0054	MARTBOX	1628	-	AAAAAaaaaa	(Motif sequence only)
gene-AT4G05100::NC_003075.7:2616372-2618371(+)	TF_motif_seq_0054	MARTBOX	1629	-	AAAAAaaaaa	(Motif sequence only)
gene-AT4G05100::NC_003075.7:2616372-2618371(+)	TF_motif_seq_0055	LBOXLERBCS	775	+	AAATTtaccca	(Motif sequence only)
gene-AT4G05100::NC_003075.7:2616372-2618371(+)	TF_motif_seq_0055	LBOXLERBCS	877	-	tgcgttAATTT	(Motif sequence only)
gene-AT4G05100::NC_003075.7:2616372-2618371(+)	TF_motif_seq_0055	LBOXLERBCS	1403	-	atagttAATTT	(Motif sequence only)
gene-AT4G05100::NC_003075.7:2616372-2618371(+)	TF_motif_seq_0056	ACGTSEED2	861	-	ttggtgTGTGT	(Motif sequence only)
gene-AT4G05100::NC_003075.7:2616372-2618371(+)	TF_motif_seq_0056	ACGTSEED2	1207	+	ACACAagttta	(Motif sequence only)
gene-AT4G05100::NC_003075.7:2616372-2618371(+)	TF_motif_seq_0057	CONSERVED11NTZMATP1	550	+	ACGTAgaaaaa	(Motif sequence only)
gene-AT4G05100::NC_003075.7:2616372-2618371(+)	TF_motif_seq_0059	ABAREG2	386	+	ATGTAtcaatc	(Motif sequence only)
gene-AT4G05100::NC_003075.7:2616372-2618371(+)	TF_motif_seq_0059	ABAREG2	1277	-	catacgTACAT	(Motif sequence only)
gene-AT4G05100::NC_003075.7:2616372-2618371(+)	TF_motif_seq_0060	UPRE1AT	578	+	ATTGGtcttca	(Motif sequence only)
gene-AT4G05100::NC_003075.7:2616372-2618371(+)	TF_motif_seq_0060	UPRE1AT	1962	-	cgtagcCCAAT	(Motif sequence only)
gene-AT4G05100::NC_003075.7:2616372-2618371(+)	TF_motif_seq_0062	RE1ASPHYA3	1125	-	cgacgtCCATG	(Motif sequence only)
gene-AT4G05100::NC_003075.7:2616372-2618371(+)	TF_motif_seq_0064	DR5GMGH3	308	-	aacacgAAAGG	(Motif sequence only)
gene-AT4G05100::NC_003075.7:2616372-2618371(+)	TF_motif_seq_0064	DR5GMGH3	1000	-	aagtccAAAGG	(Motif sequence only)
gene-AT4G05100::NC_003075.7:2616372-2618371(+)	TF_motif_seq_0065	SPHZMC1	1128	+	CGTCCatgtct	(Motif sequence only)
gene-AT4G05100::NC_003075.7:2616372-2618371(+)	TF_motif_seq_0068	GBOXRELOSAMY3	1956	-	aggacaCGTAG	(Motif sequence only)
gene-AT4G05100::NC_003075.7:2616372-2618371(+)	TF_motif_seq_0070	GLUTECOREOS	307	-	aaacacGAAAG	(Motif sequence only)
gene-AT4G05100::NC_003075.7:2616372-2618371(+)	TF_motif_seq_0077	ABRE3OSRAB16	1052	+	GTACGtggcat	(Motif sequence only)
gene-AT4G05100::NC_003075.7:2616372-2618371(+)	TF_motif_seq_0079	C1MOTIFZMBZ2	253	-	ttaattAGTTA	(Motif sequence only)
gene-AT4G05100::NC_003075.7:2616372-2618371(+)	TF_motif_seq_0079	C1MOTIFZMBZ2	1672	-	tatctaAGTTA	(Motif sequence only)
gene-AT4G05100::NC_003075.7:2616372-2618371(+)	TF_motif_seq_0079	C1MOTIFZMBZ2	1811	-	aaattaAGTTA	(Motif sequence only)
gene-AT4G05100::NC_003075.7:2616372-2618371(+)	TF_motif_seq_0083	D3GMAUX28	416	+	TATTTacttca	(Motif sequence only)
gene-AT4G05100::NC_003075.7:2616372-2618371(+)	TF_motif_seq_0083	D3GMAUX28	686	+	TATTTtcttat	(Motif sequence only)
gene-AT4G05100::NC_003075.7:2616372-2618371(+)	TF_motif_seq_0083	D3GMAUX28	798	-	atacgaAAATA	(Motif sequence only)
gene-AT4G05100::NC_003075.7:2616372-2618371(+)	TF_motif_seq_0083	D3GMAUX28	812	+	TATTTatttaa	(Motif sequence only)
gene-AT4G05100::NC_003075.7:2616372-2618371(+)	TF_motif_seq_0083	D3GMAUX28	1539	+	TATTTgagtga	(Motif sequence only)
gene-AT4G05100::NC_003075.7:2616372-2618371(+)	TF_motif_seq_0083	D3GMAUX28	1784	-	ttacaaAAATA	(Motif sequence only)
gene-AT4G05100::NC_003075.7:2616372-2618371(+)	TF_motif_seq_0084	OCETYPEIINTHISTONE	1262	+	TCACGtgtttc	(Motif sequence only)
gene-AT4G05100::NC_003075.7:2616372-2618371(+)	TF_motif_seq_0085	RBENTGA3	503	-	tggaatTTGGA	(Motif sequence only)
gene-AT4G05100::NC_003075.7:2616372-2618371(+)	TF_motif_seq_0085	RBENTGA3	1438	-	tattagTTGGA	(Motif sequence only)
gene-AT4G05100::NC_003075.7:2616372-2618371(+)	TF_motif_seq_0090	MARARS	56	+	gTTTATgtatt	(Motif sequence only)
gene-AT4G05100::NC_003075.7:2616372-2618371(+)	TF_motif_seq_0090	MARARS	411	+	aTTTATattta	(Motif sequence only)
gene-AT4G05100::NC_003075.7:2616372-2618371(+)	TF_motif_seq_0090	MARARS	679	+	aTTTATctatt	(Motif sequence only)
gene-AT4G05100::NC_003075.7:2616372-2618371(+)	TF_motif_seq_0090	MARARS	1770	-	aaaacATAAAt	(Motif sequence only)
gene-AT4G05100::NC_003075.7:2616372-2618371(+)	TF_motif_seq_0092	GLUTAACAOS	189	-	aattagtTTGTT	(Motif sequence only)
gene-AT4G05100::NC_003075.7:2616372-2618371(+)	TF_motif_seq_0092	GLUTAACAOS	979	-	atatgttTTGTT	(Motif sequence only)
gene-AT4G05100::NC_003075.7:2616372-2618371(+)	TF_motif_seq_0094	L4DCPAL1	21	-	tatttgaAGATT	(Motif sequence only)
gene-AT4G05100::NC_003075.7:2616372-2618371(+)	TF_motif_seq_0098	RBCSBOX3PS	422	-	cttcaaaATGAT	(Motif sequence only)
gene-AT4G05100::NC_003075.7:2616372-2618371(+)	TF_motif_seq_0100	D2GMAUX28	813	+	ATTTAtttaaaa	(Motif sequence only)
gene-AT4G05100::NC_003075.7:2616372-2618371(+)	TF_motif_seq_0101	HSRENTHSR203J	24	-	ttgaagaTTTTG	(Motif sequence only)
gene-AT4G05100::NC_003075.7:2616372-2618371(+)	TF_motif_seq_0101	HSRENTHSR203J	490	+	CAAAAatttcaa	(Motif sequence only)
gene-AT4G05100::NC_003075.7:2616372-2618371(+)	TF_motif_seq_0101	HSRENTHSR203J	1935	-	aaacaaaTTTTG	(Motif sequence only)
gene-AT4G05100::NC_003075.7:2616372-2618371(+)	TF_motif_seq_0107	CARGNCAT	571	+	CCAAAagattgg	(Motif sequence only)
gene-AT4G05100::NC_003075.7:2616372-2618371(+)	TF_motif_seq_0107	CARGNCAT	571	-	ccaaaagATTGG	(Motif sequence only)
gene-AT4G05100::NC_003075.7:2616372-2618371(+)	TF_motif_seq_0110	DE1PSPRA2	160	-	aatatagAATCC	(Motif sequence only)
gene-AT4G05100::NC_003075.7:2616372-2618371(+)	TF_motif_seq_0110	DE1PSPRA2	1947	+	GGATTataaagg	(Motif sequence only)
gene-AT4G05100::NC_003075.7:2616372-2618371(+)	TF_motif_seq_0119	IBOXLSCMCUCUMISIN	1664	-	ttctatacTATCT	(Motif sequence only)
gene-AT4G05100::NC_003075.7:2616372-2618371(+)	TF_motif_seq_0124	GLUTEBP1OS	513	+	AAGCAtcacaaatt	(Motif sequence only)
gene-AT4G05100::NC_003075.7:2616372-2618371(+)	TF_motif_seq_0128	SITE3SORPS1	1678	+	AGTTAtgaaaaata	(Motif sequence only)
gene-AT4G05100::NC_003075.7:2616372-2618371(+)	TF_motif_seq_0128	SITE3SORPS1	1755	-	agttataatTAACT	(Motif sequence only)
gene-AT4G05100::NC_003075.7:2616372-2618371(+)	TF_motif_seq_0130	AACAOSGLUB1	81	-	gcttttgttTGTTG	(Motif sequence only)
gene-AT4G05100::NC_003075.7:2616372-2618371(+)	TF_motif_seq_0133	14BPATERD1	1733	+	CACTAgattcacat	(Motif sequence only)
gene-AT4G05100::NC_003075.7:2616372-2618371(+)	TF_motif_seq_0135	HSE	1477	-	cgagaagaaTCAAG	(Motif sequence only)
gene-AT4G05100::NC_003075.7:2616372-2618371(+)	TF_motif_seq_0143	AS1LIKECSHPRA	427	+	AAATGattataaagc	(Motif sequence only)
gene-AT4G05100::NC_003075.7:2616372-2618371(+)	TF_motif_seq_0148	HBOXCONSENSUSPVCHS	11	+	CCTTCctgattattt	(Motif sequence only)
gene-AT4G05100::NC_003075.7:2616372-2618371(+)	TF_motif_seq_0148	HBOXCONSENSUSPVCHS	1291	+	TCTACcgtctttatt	(Motif sequence only)
gene-AT4G05100::NC_003075.7:2616372-2618371(+)	TF_motif_seq_0148	HBOXCONSENSUSPVCHS	1869	-	acaataaggtGTAGG	(Motif sequence only)
gene-AT4G05100::NC_003075.7:2616372-2618371(+)	TF_motif_seq_0155	SB3NPABC1	1680	+	TTATGaaaaatattt	(Motif sequence only)
gene-AT4G05100::NC_003075.7:2616372-2618371(+)	TF_motif_seq_0165	GAGA8HVBKN3	618	+	GAGAGagagacagaga	(Motif sequence only)
gene-AT4G05100::NC_003075.7:2616372-2618371(+)	TF_motif_seq_0165	GAGA8HVBKN3	620	+	GAGAGagacagagagg	(Motif sequence only)
gene-AT4G05100::NC_003075.7:2616372-2618371(+)	TF_motif_seq_0165	GAGA8HVBKN3	622	+	GAGAGacagagaggaa	(Motif sequence only)
gene-AT4G05100::NC_003075.7:2616372-2618371(+)	TF_motif_seq_0168	AGAMOUSATCONSENSUS	1496	-	ttagctcaattGGTAA	(Motif sequence only)
gene-AT4G05100::NC_003075.7:2616372-2618371(+)	TF_motif_seq_0176	IDE1HVIDS2	390	+	ATCAAtcaattttcttct	(Motif sequence only)
gene-AT4G05100::NC_003075.7:2616372-2618371(+)	TF_motif_seq_0180	GAGAGMGSA1	618	+	GAGAGagagacagagagg	(Motif sequence only)
gene-AT4G05100::NC_003075.7:2616372-2618371(+)	TF_motif_seq_0180	GAGAGMGSA1	620	+	GAGAGagacagagaggaa	(Motif sequence only)
gene-AT4G05100::NC_003075.7:2616372-2618371(+)	TF_motif_seq_0180	GAGAGMGSA1	622	+	GAGAGacagagaggaaca	(Motif sequence only)
gene-AT4G05100::NC_003075.7:2616372-2618371(+)	TF_motif_seq_0182	AGL2ATCONSENSUS	1805	+	aaaaCCAAAttaagttat	(Motif sequence only)
gene-AT4G05100::NC_003075.7:2616372-2618371(+)	TF_motif_seq_0183	AGL1ATCONSENSUS	1495	+	gttagctcaattGGTAAa	(Motif sequence only)
gene-AT4G05100::NC_003075.7:2616372-2618371(+)	TF_motif_seq_0186	ASF1NTPARA	779	+	TTACCcaaaaaaaactat	(Motif sequence only)
gene-AT4G05100::NC_003075.7:2616372-2618371(+)	TF_motif_seq_0186	ASF1NTPARA	1268	-	gtttcatatcataCGTAC	(Motif sequence only)
gene-AT4G05100::NC_003075.7:2616372-2618371(+)	TF_motif_seq_0186	ASF1NTPARA	1699	+	TTACCcaaattacaagat	(Motif sequence only)
gene-AT4G05100::NC_003075.7:2616372-2618371(+)	TF_motif_seq_0186	ASF1NTPARA	1784	+	TTACAaaaatacttacaa	(Motif sequence only)
gene-AT4G05100::NC_003075.7:2616372-2618371(+)	TF_motif_seq_0188	UPRMOTIFIIAT	338	-	CGTGGttcctataagagtg	(Motif sequence only)
gene-AT4G05100::NC_003075.7:2616372-2618371(+)	TF_motif_seq_0188	UPRMOTIFIIAT	1055	-	CGTGGcatcataactttgg	(Motif sequence only)
gene-AT4G05100::NC_003075.7:2616372-2618371(+)	TF_motif_seq_0189	ABFOS	1059	+	GCATCataactttggcgac	(Motif sequence only)
gene-AT4G05100::NC_003075.7:2616372-2618371(+)	TF_motif_seq_0191	C2GMAUX28	451	+	AATAAtaagatatatatata	(Motif sequence only)
gene-AT4G05100::NC_003075.7:2616372-2618371(+)	TF_motif_seq_0194	ANAEROBICCISZMGAPC4	305	+	CGAAAcacgaaagggaagat	(Motif sequence only)
gene-AT4G05100::NC_003075.7:2616372-2618371(+)	TF_motif_seq_0195	WARBNEXTA	1052	+	GTACGtggcatcataacttt	(Motif sequence only)
gene-AT4G05100::NC_003075.7:2616372-2618371(+)	TF_motif_seq_0195	WARBNEXTA	1262	-	tcacgtgtttcatatCATAC	(Motif sequence only)
gene-AT4G05100::NC_003075.7:2616372-2618371(+)	TF_motif_seq_0197	20NTNTNOS	1484	-	aatcaagtgtcgttaGCTCA	(Motif sequence only)
gene-AT4G05100::NC_003075.7:2616372-2618371(+)	TF_motif_seq_0198	OCSGMHSP26A	683	-	atctattttcttataCATCA	(Motif sequence only)
gene-AT4G05100::NC_003075.7:2616372-2618371(+)	TF_motif_seq_0198	OCSGMHSP26A	1188	-	ttaagtcttaagtatCATCA	(Motif sequence only)
gene-AT4G05100::NC_003075.7:2616372-2618371(+)	TF_motif_seq_0209	23BPUASNSCYCB1	21	-	tatttgaagattttgtctATAAA	(Motif sequence only)
gene-AT4G05100::NC_003075.7:2616372-2618371(+)	TF_motif_seq_0209	23BPUASNSCYCB1	246	-	aaagtacttaattagttaATAAA	(Motif sequence only)
gene-AT4G05100::NC_003075.7:2616372-2618371(+)	TF_motif_seq_0209	23BPUASNSCYCB1	814	+	TTTATttaaaatttgatattaga	(Motif sequence only)
gene-AT4G05100::NC_003075.7:2616372-2618371(+)	TF_motif_seq_0209	23BPUASNSCYCB1	1300	+	TTTATtaacaatattaaaacaga	(Motif sequence only)
gene-AT4G05100::NC_003075.7:2616372-2618371(+)	TF_motif_seq_0218	SUREAHVISO1	968	-	ttatccattgtatatgttttGTTTT	(Motif sequence only)
gene-AT4G05100::NC_003075.7:2616372-2618371(+)	TF_motif_seq_0219	MARCEN3	982	+	TGTTTtgtttttgcaaaaaagtcca	(Motif sequence only)
gene-AT4G05100::NC_003075.7:2616372-2618371(+)	TF_motif_seq_0222	YREGIONNTPRB1B	505	-	gaatttggaagcatcacaaatTCACA	(Motif sequence only)
gene-AT4G05100::NC_003075.7:2616372-2618371(+)	TF_motif_seq_0226	COREOS	252	+	cttaattagttaATAAAatccattttta	(Motif sequence only)
gene-AT4G05100::NC_003075.7:2616372-2618371(+)	TF_motif_seq_0226	COREOS	803	-	aaaatatgttaTTTATttaaaatttgat	(Motif sequence only)
gene-AT4G05100::NC_003075.7:2616372-2618371(+)	TF_motif_seq_0226	COREOS	1161	-	taattatcataTTTATcaattgattagt	(Motif sequence only)
gene-AT4G05100::NC_003075.7:2616372-2618371(+)	TF_motif_seq_0236	CGF1ATCAB2	653	-	tgtatgtatttaatacttgaacatttatTTATC	(Motif sequence only)
gene-AT4G05100::NC_003075.7:2616372-2618371(+)	TF_motif_seq_0236	CGF1ATCAB2	1829	-	gccagctttgttactagagttttagccaTTATC	(Motif sequence only)
gene-AT4G05100::NC_003075.7:2616372-2618371(+)	TF_motif_seq_0238	DOFCOREZM	50	-	GCTTT	(Motif sequence only)
gene-AT4G05100::NC_003075.7:2616372-2618371(+)	TF_motif_seq_0238	DOFCOREZM	81	-	GCTTT	(Motif sequence only)
gene-AT4G05100::NC_003075.7:2616372-2618371(+)	TF_motif_seq_0238	DOFCOREZM	246	+	AAAGT	(Motif sequence only)
gene-AT4G05100::NC_003075.7:2616372-2618371(+)	TF_motif_seq_0238	DOFCOREZM	298	+	AAAGT	(Motif sequence only)
gene-AT4G05100::NC_003075.7:2616372-2618371(+)	TF_motif_seq_0238	DOFCOREZM	314	+	AAAGG	(Motif sequence only)
gene-AT4G05100::NC_003075.7:2616372-2618371(+)	TF_motif_seq_0238	DOFCOREZM	437	+	AAAGC	(Motif sequence only)
gene-AT4G05100::NC_003075.7:2616372-2618371(+)	TF_motif_seq_0238	DOFCOREZM	558	+	AAAGC	(Motif sequence only)
gene-AT4G05100::NC_003075.7:2616372-2618371(+)	TF_motif_seq_0238	DOFCOREZM	574	+	AAAGA	(Motif sequence only)
gene-AT4G05100::NC_003075.7:2616372-2618371(+)	TF_motif_seq_0238	DOFCOREZM	602	+	AAAGT	(Motif sequence only)
gene-AT4G05100::NC_003075.7:2616372-2618371(+)	TF_motif_seq_0238	DOFCOREZM	848	-	TCTTT	(Motif sequence only)
gene-AT4G05100::NC_003075.7:2616372-2618371(+)	TF_motif_seq_0238	DOFCOREZM	895	-	ACTTT	(Motif sequence only)
gene-AT4G05100::NC_003075.7:2616372-2618371(+)	TF_motif_seq_0238	DOFCOREZM	926	+	AAAGT	(Motif sequence only)
gene-AT4G05100::NC_003075.7:2616372-2618371(+)	TF_motif_seq_0238	DOFCOREZM	999	+	AAAGT	(Motif sequence only)
gene-AT4G05100::NC_003075.7:2616372-2618371(+)	TF_motif_seq_0238	DOFCOREZM	1006	+	AAAGG	(Motif sequence only)
gene-AT4G05100::NC_003075.7:2616372-2618371(+)	TF_motif_seq_0238	DOFCOREZM	1018	+	AAAGC	(Motif sequence only)
gene-AT4G05100::NC_003075.7:2616372-2618371(+)	TF_motif_seq_0238	DOFCOREZM	1043	+	AAAGA	(Motif sequence only)
gene-AT4G05100::NC_003075.7:2616372-2618371(+)	TF_motif_seq_0238	DOFCOREZM	1067	-	ACTTT	(Motif sequence only)
gene-AT4G05100::NC_003075.7:2616372-2618371(+)	TF_motif_seq_0238	DOFCOREZM	1098	+	AAAGC	(Motif sequence only)
gene-AT4G05100::NC_003075.7:2616372-2618371(+)	TF_motif_seq_0238	DOFCOREZM	1138	-	TCTTT	(Motif sequence only)
gene-AT4G05100::NC_003075.7:2616372-2618371(+)	TF_motif_seq_0238	DOFCOREZM	1298	-	TCTTT	(Motif sequence only)
gene-AT4G05100::NC_003075.7:2616372-2618371(+)	TF_motif_seq_0238	DOFCOREZM	1523	+	AAAGC	(Motif sequence only)
gene-AT4G05100::NC_003075.7:2616372-2618371(+)	TF_motif_seq_0238	DOFCOREZM	1833	-	GCTTT	(Motif sequence only)
gene-AT4G05100::NC_003075.7:2616372-2618371(+)	TF_motif_seq_0238	DOFCOREZM	1923	-	ACTTT	(Motif sequence only)
gene-AT4G05100::NC_003075.7:2616372-2618371(+)	TF_motif_seq_0238	DOFCOREZM	1954	+	AAAGG	(Motif sequence only)
gene-AT4G05100::NC_003075.7:2616372-2618371(+)	TF_motif_seq_0242	CAATBOX1	156	+	CAATA	(Motif sequence only)
gene-AT4G05100::NC_003075.7:2616372-2618371(+)	TF_motif_seq_0242	CAATBOX1	392	+	CAATC	(Motif sequence only)
gene-AT4G05100::NC_003075.7:2616372-2618371(+)	TF_motif_seq_0242	CAATBOX1	396	+	CAATT	(Motif sequence only)
gene-AT4G05100::NC_003075.7:2616372-2618371(+)	TF_motif_seq_0242	CAATBOX1	446	+	CAATG	(Motif sequence only)
gene-AT4G05100::NC_003075.7:2616372-2618371(+)	TF_motif_seq_0242	CAATBOX1	529	+	CAATC	(Motif sequence only)
gene-AT4G05100::NC_003075.7:2616372-2618371(+)	TF_motif_seq_0242	CAATBOX1	577	-	GATTG	(Motif sequence only)
gene-AT4G05100::NC_003075.7:2616372-2618371(+)	TF_motif_seq_0242	CAATBOX1	752	-	AATTG	(Motif sequence only)
gene-AT4G05100::NC_003075.7:2616372-2618371(+)	TF_motif_seq_0242	CAATBOX1	757	+	CAATT	(Motif sequence only)
gene-AT4G05100::NC_003075.7:2616372-2618371(+)	TF_motif_seq_0242	CAATBOX1	758	-	AATTG	(Motif sequence only)
gene-AT4G05100::NC_003075.7:2616372-2618371(+)	TF_motif_seq_0242	CAATBOX1	770	-	TATTG	(Motif sequence only)
gene-AT4G05100::NC_003075.7:2616372-2618371(+)	TF_motif_seq_0242	CAATBOX1	973	-	CATTG	(Motif sequence only)
gene-AT4G05100::NC_003075.7:2616372-2618371(+)	TF_motif_seq_0242	CAATBOX1	1033	-	AATTG	(Motif sequence only)
gene-AT4G05100::NC_003075.7:2616372-2618371(+)	TF_motif_seq_0242	CAATBOX1	1144	-	GATTG	(Motif sequence only)
gene-AT4G05100::NC_003075.7:2616372-2618371(+)	TF_motif_seq_0242	CAATBOX1	1150	-	GATTG	(Motif sequence only)
gene-AT4G05100::NC_003075.7:2616372-2618371(+)	TF_motif_seq_0242	CAATBOX1	1155	-	CATTG	(Motif sequence only)
gene-AT4G05100::NC_003075.7:2616372-2618371(+)	TF_motif_seq_0242	CAATBOX1	1177	+	CAATT	(Motif sequence only)
gene-AT4G05100::NC_003075.7:2616372-2618371(+)	TF_motif_seq_0242	CAATBOX1	1178	-	AATTG	(Motif sequence only)
gene-AT4G05100::NC_003075.7:2616372-2618371(+)	TF_motif_seq_0242	CAATBOX1	1308	+	CAATA	(Motif sequence only)
gene-AT4G05100::NC_003075.7:2616372-2618371(+)	TF_motif_seq_0242	CAATBOX1	1329	+	CAATT	(Motif sequence only)
gene-AT4G05100::NC_003075.7:2616372-2618371(+)	TF_motif_seq_0242	CAATBOX1	1394	+	CAATT	(Motif sequence only)
gene-AT4G05100::NC_003075.7:2616372-2618371(+)	TF_motif_seq_0242	CAATBOX1	1447	-	GATTG	(Motif sequence only)
gene-AT4G05100::NC_003075.7:2616372-2618371(+)	TF_motif_seq_0242	CAATBOX1	1502	+	CAATT	(Motif sequence only)
gene-AT4G05100::NC_003075.7:2616372-2618371(+)	TF_motif_seq_0242	CAATBOX1	1503	-	AATTG	(Motif sequence only)
gene-AT4G05100::NC_003075.7:2616372-2618371(+)	TF_motif_seq_0242	CAATBOX1	1870	+	CAATA	(Motif sequence only)
gene-AT4G05100::NC_003075.7:2616372-2618371(+)	TF_motif_seq_0242	CAATBOX1	1969	+	CAATC	(Motif sequence only)
gene-AT4G05100::NC_003075.7:2616372-2618371(+)	TF_motif_seq_0245	GTGANTG10	354	+	GTGAT	(Motif sequence only)
gene-AT4G05100::NC_003075.7:2616372-2618371(+)	TF_motif_seq_0245	GTGANTG10	371	-	GTCAC	(Motif sequence only)
gene-AT4G05100::NC_003075.7:2616372-2618371(+)	TF_motif_seq_0245	GTGANTG10	406	-	CTCAC	(Motif sequence only)
gene-AT4G05100::NC_003075.7:2616372-2618371(+)	TF_motif_seq_0245	GTGANTG10	517	-	ATCAC	(Motif sequence only)
gene-AT4G05100::NC_003075.7:2616372-2618371(+)	TF_motif_seq_0245	GTGANTG10	525	-	TTCAC	(Motif sequence only)
gene-AT4G05100::NC_003075.7:2616372-2618371(+)	TF_motif_seq_0245	GTGANTG10	547	-	CTCAC	(Motif sequence only)
gene-AT4G05100::NC_003075.7:2616372-2618371(+)	TF_motif_seq_0245	GTGANTG10	705	-	CTCAC	(Motif sequence only)
gene-AT4G05100::NC_003075.7:2616372-2618371(+)	TF_motif_seq_0245	GTGANTG10	870	+	GTGAA	(Motif sequence only)
gene-AT4G05100::NC_003075.7:2616372-2618371(+)	TF_motif_seq_0245	GTGANTG10	899	-	TTCAC	(Motif sequence only)
gene-AT4G05100::NC_003075.7:2616372-2618371(+)	TF_motif_seq_0245	GTGANTG10	1037	+	GTGAG	(Motif sequence only)
gene-AT4G05100::NC_003075.7:2616372-2618371(+)	TF_motif_seq_0245	GTGANTG10	1085	+	GTGAA	(Motif sequence only)
gene-AT4G05100::NC_003075.7:2616372-2618371(+)	TF_motif_seq_0245	GTGANTG10	1148	+	GTGAT	(Motif sequence only)
gene-AT4G05100::NC_003075.7:2616372-2618371(+)	TF_motif_seq_0245	GTGANTG10	1204	-	ATCAC	(Motif sequence only)
gene-AT4G05100::NC_003075.7:2616372-2618371(+)	TF_motif_seq_0245	GTGANTG10	1261	-	ATCAC	(Motif sequence only)
gene-AT4G05100::NC_003075.7:2616372-2618371(+)	TF_motif_seq_0245	GTGANTG10	1421	-	ATCAC	(Motif sequence only)
gene-AT4G05100::NC_003075.7:2616372-2618371(+)	TF_motif_seq_0245	GTGANTG10	1546	+	GTGAC	(Motif sequence only)
gene-AT4G05100::NC_003075.7:2616372-2618371(+)	TF_motif_seq_0245	GTGANTG10	1729	-	GTCAC	(Motif sequence only)
gene-AT4G05100::NC_003075.7:2616372-2618371(+)	TF_motif_seq_0245	GTGANTG10	1740	-	TTCAC	(Motif sequence only)
gene-AT4G05100::NC_003075.7:2616372-2618371(+)	TF_motif_seq_0245	GTGANTG10	1866	-	TTCAC	(Motif sequence only)
gene-AT4G05100::NC_003075.7:2616372-2618371(+)	TF_motif_seq_0247	CACTFTPPCA1	72	+	TACTT	(Motif sequence only)
gene-AT4G05100::NC_003075.7:2616372-2618371(+)	TF_motif_seq_0247	CACTFTPPCA1	214	+	TACTC	(Motif sequence only)
gene-AT4G05100::NC_003075.7:2616372-2618371(+)	TF_motif_seq_0247	CACTFTPPCA1	247	-	AAGTA	(Motif sequence only)
gene-AT4G05100::NC_003075.7:2616372-2618371(+)	TF_motif_seq_0247	CACTFTPPCA1	250	+	TACTT	(Motif sequence only)
gene-AT4G05100::NC_003075.7:2616372-2618371(+)	TF_motif_seq_0247	CACTFTPPCA1	299	-	AAGTG	(Motif sequence only)
gene-AT4G05100::NC_003075.7:2616372-2618371(+)	TF_motif_seq_0247	CACTFTPPCA1	352	-	GAGTG	(Motif sequence only)
gene-AT4G05100::NC_003075.7:2616372-2618371(+)	TF_motif_seq_0247	CACTFTPPCA1	420	+	TACTT	(Motif sequence only)
gene-AT4G05100::NC_003075.7:2616372-2618371(+)	TF_motif_seq_0247	CACTFTPPCA1	666	+	TACTT	(Motif sequence only)
gene-AT4G05100::NC_003075.7:2616372-2618371(+)	TF_motif_seq_0247	CACTFTPPCA1	894	+	TACTT	(Motif sequence only)
gene-AT4G05100::NC_003075.7:2616372-2618371(+)	TF_motif_seq_0247	CACTFTPPCA1	943	-	CAGTA	(Motif sequence only)
gene-AT4G05100::NC_003075.7:2616372-2618371(+)	TF_motif_seq_0247	CACTFTPPCA1	1050	-	GAGTA	(Motif sequence only)
gene-AT4G05100::NC_003075.7:2616372-2618371(+)	TF_motif_seq_0247	CACTFTPPCA1	1115	+	CACTC	(Motif sequence only)
gene-AT4G05100::NC_003075.7:2616372-2618371(+)	TF_motif_seq_0247	CACTFTPPCA1	1197	-	AAGTA	(Motif sequence only)
gene-AT4G05100::NC_003075.7:2616372-2618371(+)	TF_motif_seq_0247	CACTFTPPCA1	1232	-	CAGTG	(Motif sequence only)
gene-AT4G05100::NC_003075.7:2616372-2618371(+)	TF_motif_seq_0247	CACTFTPPCA1	1242	+	CACTA	(Motif sequence only)
gene-AT4G05100::NC_003075.7:2616372-2618371(+)	TF_motif_seq_0247	CACTFTPPCA1	1354	+	TACTA	(Motif sequence only)
gene-AT4G05100::NC_003075.7:2616372-2618371(+)	TF_motif_seq_0247	CACTFTPPCA1	1423	+	CACTC	(Motif sequence only)
gene-AT4G05100::NC_003075.7:2616372-2618371(+)	TF_motif_seq_0247	CACTFTPPCA1	1488	-	AAGTG	(Motif sequence only)
gene-AT4G05100::NC_003075.7:2616372-2618371(+)	TF_motif_seq_0247	CACTFTPPCA1	1544	-	GAGTG	(Motif sequence only)
gene-AT4G05100::NC_003075.7:2616372-2618371(+)	TF_motif_seq_0247	CACTFTPPCA1	1669	+	TACTA	(Motif sequence only)
gene-AT4G05100::NC_003075.7:2616372-2618371(+)	TF_motif_seq_0247	CACTFTPPCA1	1725	-	AAGTG	(Motif sequence only)
gene-AT4G05100::NC_003075.7:2616372-2618371(+)	TF_motif_seq_0247	CACTFTPPCA1	1733	+	CACTA	(Motif sequence only)
gene-AT4G05100::NC_003075.7:2616372-2618371(+)	TF_motif_seq_0247	CACTFTPPCA1	1793	+	TACTT	(Motif sequence only)
gene-AT4G05100::NC_003075.7:2616372-2618371(+)	TF_motif_seq_0247	CACTFTPPCA1	1824	-	TAGTG	(Motif sequence only)
gene-AT4G05100::NC_003075.7:2616372-2618371(+)	TF_motif_seq_0247	CACTFTPPCA1	1840	+	TACTA	(Motif sequence only)
gene-AT4G05100::NC_003075.7:2616372-2618371(+)	TF_motif_seq_0247	CACTFTPPCA1	1900	-	TAGTA	(Motif sequence only)
gene-AT4G05100::NC_003075.7:2616372-2618371(+)	TF_motif_seq_0248	MYBCOREATCYCB1	271	-	CCATT	(Motif sequence only)
gene-AT4G05100::NC_003075.7:2616372-2618371(+)	TF_motif_seq_0248	MYBCOREATCYCB1	314	+	AAAGG	(Motif sequence only)
gene-AT4G05100::NC_003075.7:2616372-2618371(+)	TF_motif_seq_0248	MYBCOREATCYCB1	315	+	AAGGG	(Motif sequence only)
gene-AT4G05100::NC_003075.7:2616372-2618371(+)	TF_motif_seq_0248	MYBCOREATCYCB1	501	+	AATGG	(Motif sequence only)
gene-AT4G05100::NC_003075.7:2616372-2618371(+)	TF_motif_seq_0248	MYBCOREATCYCB1	636	+	AACAG	(Motif sequence only)
gene-AT4G05100::NC_003075.7:2616372-2618371(+)	TF_motif_seq_0248	MYBCOREATCYCB1	730	-	TCGTT	(Motif sequence only)
gene-AT4G05100::NC_003075.7:2616372-2618371(+)	TF_motif_seq_0248	MYBCOREATCYCB1	878	-	GCGTT	(Motif sequence only)
gene-AT4G05100::NC_003075.7:2616372-2618371(+)	TF_motif_seq_0248	MYBCOREATCYCB1	941	+	AACAG	(Motif sequence only)
gene-AT4G05100::NC_003075.7:2616372-2618371(+)	TF_motif_seq_0248	MYBCOREATCYCB1	972	-	CCATT	(Motif sequence only)
gene-AT4G05100::NC_003075.7:2616372-2618371(+)	TF_motif_seq_0248	MYBCOREATCYCB1	1006	+	AAAGG	(Motif sequence only)
gene-AT4G05100::NC_003075.7:2616372-2618371(+)	TF_motif_seq_0248	MYBCOREATCYCB1	1025	+	AAGGG	(Motif sequence only)
gene-AT4G05100::NC_003075.7:2616372-2618371(+)	TF_motif_seq_0248	MYBCOREATCYCB1	1090	+	AACAG	(Motif sequence only)
gene-AT4G05100::NC_003075.7:2616372-2618371(+)	TF_motif_seq_0248	MYBCOREATCYCB1	1103	+	TACGG	(Motif sequence only)
gene-AT4G05100::NC_003075.7:2616372-2618371(+)	TF_motif_seq_0248	MYBCOREATCYCB1	1295	-	CCGTC	(Motif sequence only)
gene-AT4G05100::NC_003075.7:2616372-2618371(+)	TF_motif_seq_0248	MYBCOREATCYCB1	1317	+	AACAG	(Motif sequence only)
gene-AT4G05100::NC_003075.7:2616372-2618371(+)	TF_motif_seq_0248	MYBCOREATCYCB1	1475	+	AACGA	(Motif sequence only)
gene-AT4G05100::NC_003075.7:2616372-2618371(+)	TF_motif_seq_0248	MYBCOREATCYCB1	1493	-	TCGTT	(Motif sequence only)
gene-AT4G05100::NC_003075.7:2616372-2618371(+)	TF_motif_seq_0248	MYBCOREATCYCB1	1658	+	AATGG	(Motif sequence only)
gene-AT4G05100::NC_003075.7:2616372-2618371(+)	TF_motif_seq_0248	MYBCOREATCYCB1	1854	-	CCATT	(Motif sequence only)
gene-AT4G05100::NC_003075.7:2616372-2618371(+)	TF_motif_seq_0248	MYBCOREATCYCB1	1954	+	AAAGG	(Motif sequence only)
gene-AT4G05100::NC_003075.7:2616372-2618371(+)	TF_motif_seq_0248	MYBCOREATCYCB1	1978	+	AACAG	(Motif sequence only)
gene-AT4G05100::NC_003075.7:2616372-2618371(+)	TF_motif_seq_0248	MYBCOREATCYCB1	1985	+	GACGG	(Motif sequence only)
gene-AT4G05100::NC_003075.7:2616372-2618371(+)	TF_motif_seq_0249	ABRELATERD1	73	+	ACTTG	(Motif sequence only)
gene-AT4G05100::NC_003075.7:2616372-2618371(+)	TF_motif_seq_0249	ABRELATERD1	299	+	AAGTG	(Motif sequence only)
gene-AT4G05100::NC_003075.7:2616372-2618371(+)	TF_motif_seq_0249	ABRELATERD1	310	-	CACGA	(Motif sequence only)
gene-AT4G05100::NC_003075.7:2616372-2618371(+)	TF_motif_seq_0249	ABRELATERD1	336	-	CTCGT	(Motif sequence only)
gene-AT4G05100::NC_003075.7:2616372-2618371(+)	TF_motif_seq_0249	ABRELATERD1	337	+	TCGTG	(Motif sequence only)
gene-AT4G05100::NC_003075.7:2616372-2618371(+)	TF_motif_seq_0249	ABRELATERD1	368	-	GACGT	(Motif sequence only)
gene-AT4G05100::NC_003075.7:2616372-2618371(+)	TF_motif_seq_0249	ABRELATERD1	369	+	ACGTC	(Motif sequence only)
gene-AT4G05100::NC_003075.7:2616372-2618371(+)	TF_motif_seq_0249	ABRELATERD1	373	-	CACGC	(Motif sequence only)
gene-AT4G05100::NC_003075.7:2616372-2618371(+)	TF_motif_seq_0249	ABRELATERD1	408	-	CACAT	(Motif sequence only)
gene-AT4G05100::NC_003075.7:2616372-2618371(+)	TF_motif_seq_0249	ABRELATERD1	533	-	CATGT	(Motif sequence only)
gene-AT4G05100::NC_003075.7:2616372-2618371(+)	TF_motif_seq_0249	ABRELATERD1	549	-	CACGT	(Motif sequence only)
gene-AT4G05100::NC_003075.7:2616372-2618371(+)	TF_motif_seq_0249	ABRELATERD1	550	+	ACGTA	(Motif sequence only)
gene-AT4G05100::NC_003075.7:2616372-2618371(+)	TF_motif_seq_0249	ABRELATERD1	667	+	ACTTG	(Motif sequence only)
gene-AT4G05100::NC_003075.7:2616372-2618371(+)	TF_motif_seq_0249	ABRELATERD1	707	-	CACGA	(Motif sequence only)
gene-AT4G05100::NC_003075.7:2616372-2618371(+)	TF_motif_seq_0249	ABRELATERD1	859	+	ACTTG	(Motif sequence only)
gene-AT4G05100::NC_003075.7:2616372-2618371(+)	TF_motif_seq_0249	ABRELATERD1	874	+	ACCTG	(Motif sequence only)
gene-AT4G05100::NC_003075.7:2616372-2618371(+)	TF_motif_seq_0249	ABRELATERD1	901	-	CACGT	(Motif sequence only)
gene-AT4G05100::NC_003075.7:2616372-2618371(+)	TF_motif_seq_0249	ABRELATERD1	902	+	ACGTA	(Motif sequence only)
gene-AT4G05100::NC_003075.7:2616372-2618371(+)	TF_motif_seq_0249	ABRELATERD1	1053	-	TACGT	(Motif sequence only)
gene-AT4G05100::NC_003075.7:2616372-2618371(+)	TF_motif_seq_0249	ABRELATERD1	1054	+	ACGTG	(Motif sequence only)
gene-AT4G05100::NC_003075.7:2616372-2618371(+)	TF_motif_seq_0249	ABRELATERD1	1083	+	ATGTG	(Motif sequence only)
gene-AT4G05100::NC_003075.7:2616372-2618371(+)	TF_motif_seq_0249	ABRELATERD1	1126	-	GACGT	(Motif sequence only)
gene-AT4G05100::NC_003075.7:2616372-2618371(+)	TF_motif_seq_0249	ABRELATERD1	1127	+	ACGTC	(Motif sequence only)
gene-AT4G05100::NC_003075.7:2616372-2618371(+)	TF_motif_seq_0249	ABRELATERD1	1132	-	CATGT	(Motif sequence only)
gene-AT4G05100::NC_003075.7:2616372-2618371(+)	TF_motif_seq_0249	ABRELATERD1	1210	-	CAAGT	(Motif sequence only)
gene-AT4G05100::NC_003075.7:2616372-2618371(+)	TF_motif_seq_0249	ABRELATERD1	1263	-	CACGT	(Motif sequence only)
gene-AT4G05100::NC_003075.7:2616372-2618371(+)	TF_motif_seq_0249	ABRELATERD1	1264	+	ACGTG	(Motif sequence only)
gene-AT4G05100::NC_003075.7:2616372-2618371(+)	TF_motif_seq_0249	ABRELATERD1	1279	-	TACGT	(Motif sequence only)
gene-AT4G05100::NC_003075.7:2616372-2618371(+)	TF_motif_seq_0249	ABRELATERD1	1280	+	ACGTA	(Motif sequence only)
gene-AT4G05100::NC_003075.7:2616372-2618371(+)	TF_motif_seq_0249	ABRELATERD1	1476	+	ACGAG	(Motif sequence only)
gene-AT4G05100::NC_003075.7:2616372-2618371(+)	TF_motif_seq_0249	ABRELATERD1	1487	-	CAAGT	(Motif sequence only)
gene-AT4G05100::NC_003075.7:2616372-2618371(+)	TF_motif_seq_0249	ABRELATERD1	1488	+	AAGTG	(Motif sequence only)
gene-AT4G05100::NC_003075.7:2616372-2618371(+)	TF_motif_seq_0249	ABRELATERD1	1567	+	ACATG	(Motif sequence only)
gene-AT4G05100::NC_003075.7:2616372-2618371(+)	TF_motif_seq_0249	ABRELATERD1	1725	+	AAGTG	(Motif sequence only)
gene-AT4G05100::NC_003075.7:2616372-2618371(+)	TF_motif_seq_0249	ABRELATERD1	1742	-	CACAT	(Motif sequence only)
gene-AT4G05100::NC_003075.7:2616372-2618371(+)	TF_motif_seq_0249	ABRELATERD1	1743	+	ACATG	(Motif sequence only)
gene-AT4G05100::NC_003075.7:2616372-2618371(+)	TF_motif_seq_0249	ABRELATERD1	1875	+	AGGTG	(Motif sequence only)
gene-AT4G05100::NC_003075.7:2616372-2618371(+)	TF_motif_seq_0249	ABRELATERD1	1960	-	CACGT	(Motif sequence only)
gene-AT4G05100::NC_003075.7:2616372-2618371(+)	TF_motif_seq_0249	ABRELATERD1	1961	+	ACGTA	(Motif sequence only)
gene-AT4G05100::NC_003075.7:2616372-2618371(+)	TF_motif_seq_0250	POLLEN1LELAT52	400	-	TTTCT	(Motif sequence only)
gene-AT4G05100::NC_003075.7:2616372-2618371(+)	TF_motif_seq_0250	POLLEN1LELAT52	554	+	AGAAA	(Motif sequence only)
gene-AT4G05100::NC_003075.7:2616372-2618371(+)	TF_motif_seq_0250	POLLEN1LELAT52	593	-	TTTCT	(Motif sequence only)
gene-AT4G05100::NC_003075.7:2616372-2618371(+)	TF_motif_seq_0250	POLLEN1LELAT52	600	+	AGAAA	(Motif sequence only)
gene-AT4G05100::NC_003075.7:2616372-2618371(+)	TF_motif_seq_0250	POLLEN1LELAT52	689	-	TTTCT	(Motif sequence only)
gene-AT4G05100::NC_003075.7:2616372-2618371(+)	TF_motif_seq_0250	POLLEN1LELAT52	1333	-	TTTCT	(Motif sequence only)
gene-AT4G05100::NC_003075.7:2616372-2618371(+)	TF_motif_seq_0250	POLLEN1LELAT52	1460	-	TTTCT	(Motif sequence only)
gene-AT4G05100::NC_003075.7:2616372-2618371(+)	TF_motif_seq_0250	POLLEN1LELAT52	1590	+	AGAAA	(Motif sequence only)
gene-AT4G05100::NC_003075.7:2616372-2618371(+)	TF_motif_seq_0250	POLLEN1LELAT52	1663	-	TTTCT	(Motif sequence only)
gene-AT4G05100::NC_003075.7:2616372-2618371(+)	TF_motif_seq_0253	ROOTMOTIFTAPOX1	96	-	AATAT	(Motif sequence only)
gene-AT4G05100::NC_003075.7:2616372-2618371(+)	TF_motif_seq_0253	ROOTMOTIFTAPOX1	97	+	ATATT	(Motif sequence only)
gene-AT4G05100::NC_003075.7:2616372-2618371(+)	TF_motif_seq_0253	ROOTMOTIFTAPOX1	160	-	AATAT	(Motif sequence only)
gene-AT4G05100::NC_003075.7:2616372-2618371(+)	TF_motif_seq_0253	ROOTMOTIFTAPOX1	173	-	AATAT	(Motif sequence only)
gene-AT4G05100::NC_003075.7:2616372-2618371(+)	TF_motif_seq_0253	ROOTMOTIFTAPOX1	174	+	ATATT	(Motif sequence only)
gene-AT4G05100::NC_003075.7:2616372-2618371(+)	TF_motif_seq_0253	ROOTMOTIFTAPOX1	221	+	ATATT	(Motif sequence only)
gene-AT4G05100::NC_003075.7:2616372-2618371(+)	TF_motif_seq_0253	ROOTMOTIFTAPOX1	415	+	ATATT	(Motif sequence only)
gene-AT4G05100::NC_003075.7:2616372-2618371(+)	TF_motif_seq_0253	ROOTMOTIFTAPOX1	805	-	AATAT	(Motif sequence only)
gene-AT4G05100::NC_003075.7:2616372-2618371(+)	TF_motif_seq_0253	ROOTMOTIFTAPOX1	829	+	ATATT	(Motif sequence only)
gene-AT4G05100::NC_003075.7:2616372-2618371(+)	TF_motif_seq_0253	ROOTMOTIFTAPOX1	1169	+	ATATT	(Motif sequence only)
gene-AT4G05100::NC_003075.7:2616372-2618371(+)	TF_motif_seq_0253	ROOTMOTIFTAPOX1	1309	-	AATAT	(Motif sequence only)
gene-AT4G05100::NC_003075.7:2616372-2618371(+)	TF_motif_seq_0253	ROOTMOTIFTAPOX1	1310	+	ATATT	(Motif sequence only)
gene-AT4G05100::NC_003075.7:2616372-2618371(+)	TF_motif_seq_0253	ROOTMOTIFTAPOX1	1455	+	ATATT	(Motif sequence only)
gene-AT4G05100::NC_003075.7:2616372-2618371(+)	TF_motif_seq_0253	ROOTMOTIFTAPOX1	1469	-	AATAT	(Motif sequence only)
gene-AT4G05100::NC_003075.7:2616372-2618371(+)	TF_motif_seq_0253	ROOTMOTIFTAPOX1	1617	+	ATATT	(Motif sequence only)
gene-AT4G05100::NC_003075.7:2616372-2618371(+)	TF_motif_seq_0253	ROOTMOTIFTAPOX1	1688	-	AATAT	(Motif sequence only)
gene-AT4G05100::NC_003075.7:2616372-2618371(+)	TF_motif_seq_0253	ROOTMOTIFTAPOX1	1689	+	ATATT	(Motif sequence only)
gene-AT4G05100::NC_003075.7:2616372-2618371(+)	TF_motif_seq_0253	ROOTMOTIFTAPOX1	1894	-	AATAT	(Motif sequence only)
gene-AT4G05100::NC_003075.7:2616372-2618371(+)	TF_motif_seq_0259	CGACGOSAMY3	5	+	CGTCG	(Motif sequence only)
gene-AT4G05100::NC_003075.7:2616372-2618371(+)	TF_motif_seq_0259	CGACGOSAMY3	5	-	CGTCG	(Motif sequence only)
gene-AT4G05100::NC_003075.7:2616372-2618371(+)	TF_motif_seq_0259	CGACGOSAMY3	8	-	CGTCC	(Motif sequence only)
gene-AT4G05100::NC_003075.7:2616372-2618371(+)	TF_motif_seq_0259	CGACGOSAMY3	302	-	TGTCG	(Motif sequence only)
gene-AT4G05100::NC_003075.7:2616372-2618371(+)	TF_motif_seq_0259	CGACGOSAMY3	338	-	CGTGG	(Motif sequence only)
gene-AT4G05100::NC_003075.7:2616372-2618371(+)	TF_motif_seq_0259	CGACGOSAMY3	367	+	TGACG	(Motif sequence only)
gene-AT4G05100::NC_003075.7:2616372-2618371(+)	TF_motif_seq_0259	CGACGOSAMY3	370	-	CGTCA	(Motif sequence only)
gene-AT4G05100::NC_003075.7:2616372-2618371(+)	TF_motif_seq_0259	CGACGOSAMY3	551	-	CGTAG	(Motif sequence only)
gene-AT4G05100::NC_003075.7:2616372-2618371(+)	TF_motif_seq_0259	CGACGOSAMY3	728	-	TGTCG	(Motif sequence only)
gene-AT4G05100::NC_003075.7:2616372-2618371(+)	TF_motif_seq_0259	CGACGOSAMY3	1055	-	CGTGG	(Motif sequence only)
gene-AT4G05100::NC_003075.7:2616372-2618371(+)	TF_motif_seq_0259	CGACGOSAMY3	1074	+	CGACA	(Motif sequence only)
gene-AT4G05100::NC_003075.7:2616372-2618371(+)	TF_motif_seq_0259	CGACGOSAMY3	1102	+	CTACG	(Motif sequence only)
gene-AT4G05100::NC_003075.7:2616372-2618371(+)	TF_motif_seq_0259	CGACGOSAMY3	1112	+	CGACA	(Motif sequence only)
gene-AT4G05100::NC_003075.7:2616372-2618371(+)	TF_motif_seq_0259	CGACGOSAMY3	1119	-	CCTCG	(Motif sequence only)
gene-AT4G05100::NC_003075.7:2616372-2618371(+)	TF_motif_seq_0259	CGACGOSAMY3	1122	+	CGACG	(Motif sequence only)
gene-AT4G05100::NC_003075.7:2616372-2618371(+)	TF_motif_seq_0259	CGACGOSAMY3	1122	-	CGACG	(Motif sequence only)
gene-AT4G05100::NC_003075.7:2616372-2618371(+)	TF_motif_seq_0259	CGACGOSAMY3	1125	+	CGACG	(Motif sequence only)
gene-AT4G05100::NC_003075.7:2616372-2618371(+)	TF_motif_seq_0259	CGACGOSAMY3	1125	-	CGACG	(Motif sequence only)
gene-AT4G05100::NC_003075.7:2616372-2618371(+)	TF_motif_seq_0259	CGACGOSAMY3	1128	-	CGTCC	(Motif sequence only)
gene-AT4G05100::NC_003075.7:2616372-2618371(+)	TF_motif_seq_0259	CGACGOSAMY3	1296	-	CGTCT	(Motif sequence only)
gene-AT4G05100::NC_003075.7:2616372-2618371(+)	TF_motif_seq_0259	CGACGOSAMY3	1450	+	TGACG	(Motif sequence only)
gene-AT4G05100::NC_003075.7:2616372-2618371(+)	TF_motif_seq_0259	CGACGOSAMY3	1474	+	CAACG	(Motif sequence only)
gene-AT4G05100::NC_003075.7:2616372-2618371(+)	TF_motif_seq_0259	CGACGOSAMY3	1491	-	TGTCG	(Motif sequence only)
gene-AT4G05100::NC_003075.7:2616372-2618371(+)	TF_motif_seq_0259	CGACGOSAMY3	1547	+	TGACG	(Motif sequence only)
gene-AT4G05100::NC_003075.7:2616372-2618371(+)	TF_motif_seq_0259	CGACGOSAMY3	1597	-	CTTCG	(Motif sequence only)
gene-AT4G05100::NC_003075.7:2616372-2618371(+)	TF_motif_seq_0259	CGACGOSAMY3	1723	+	CGAAG	(Motif sequence only)
gene-AT4G05100::NC_003075.7:2616372-2618371(+)	TF_motif_seq_0259	CGACGOSAMY3	1962	-	CGTAG	(Motif sequence only)
gene-AT4G05100::NC_003075.7:2616372-2618371(+)	TF_motif_seq_0259	CGACGOSAMY3	1973	+	CGATG	(Motif sequence only)
gene-AT4G05100::NC_003075.7:2616372-2618371(+)	TF_motif_seq_0259	CGACGOSAMY3	1984	+	GGACG	(Motif sequence only)
gene-AT4G05100::NC_003075.7:2616372-2618371(+)	TF_motif_seq_0260	OSE2ROOTNODULE	350	-	AAGAG	(Motif sequence only)
gene-AT4G05100::NC_003075.7:2616372-2618371(+)	TF_motif_seq_0260	OSE2ROOTNODULE	1044	-	AAGAG	(Motif sequence only)
gene-AT4G05100::NC_003075.7:2616372-2618371(+)	TF_motif_seq_0260	OSE2ROOTNODULE	1137	+	CTCTT	(Motif sequence only)
gene-AT4G05100::NC_003075.7:2616372-2618371(+)	TF_motif_seq_0260	OSE2ROOTNODULE	1368	+	CTCTT	(Motif sequence only)
gene-AT4G05100::NC_003075.7:2616372-2618371(+)	TF_motif_seq_0260	OSE2ROOTNODULE	1611	+	CTCTT	(Motif sequence only)
gene-AT4G05100::NC_003075.7:2616372-2618371(+)	TF_motif_seq_0261	SURECOREATSULTR11	35	-	GTCTA	(Motif sequence only)
gene-AT4G05100::NC_003075.7:2616372-2618371(+)	TF_motif_seq_0261	SURECOREATSULTR11	123	+	GAAAC	(Motif sequence only)
gene-AT4G05100::NC_003075.7:2616372-2618371(+)	TF_motif_seq_0261	SURECOREATSULTR11	237	+	GAGAT	(Motif sequence only)
gene-AT4G05100::NC_003075.7:2616372-2618371(+)	TF_motif_seq_0261	SURECOREATSULTR11	301	-	GTGTC	(Motif sequence only)
gene-AT4G05100::NC_003075.7:2616372-2618371(+)	TF_motif_seq_0261	SURECOREATSULTR11	306	+	GAAAC	(Motif sequence only)
gene-AT4G05100::NC_003075.7:2616372-2618371(+)	TF_motif_seq_0261	SURECOREATSULTR11	371	-	GTCAC	(Motif sequence only)
gene-AT4G05100::NC_003075.7:2616372-2618371(+)	TF_motif_seq_0261	SURECOREATSULTR11	388	-	GTATC	(Motif sequence only)
gene-AT4G05100::NC_003075.7:2616372-2618371(+)	TF_motif_seq_0261	SURECOREATSULTR11	404	-	TTCTC	(Motif sequence only)
gene-AT4G05100::NC_003075.7:2616372-2618371(+)	TF_motif_seq_0261	SURECOREATSULTR11	545	-	ATCTC	(Motif sequence only)
gene-AT4G05100::NC_003075.7:2616372-2618371(+)	TF_motif_seq_0261	SURECOREATSULTR11	582	-	GTCTT	(Motif sequence only)
gene-AT4G05100::NC_003075.7:2616372-2618371(+)	TF_motif_seq_0261	SURECOREATSULTR11	599	+	GAGAA	(Motif sequence only)
gene-AT4G05100::NC_003075.7:2616372-2618371(+)	TF_motif_seq_0261	SURECOREATSULTR11	618	+	GAGAG	(Motif sequence only)
gene-AT4G05100::NC_003075.7:2616372-2618371(+)	TF_motif_seq_0261	SURECOREATSULTR11	620	+	GAGAG	(Motif sequence only)
gene-AT4G05100::NC_003075.7:2616372-2618371(+)	TF_motif_seq_0261	SURECOREATSULTR11	622	+	GAGAG	(Motif sequence only)
gene-AT4G05100::NC_003075.7:2616372-2618371(+)	TF_motif_seq_0261	SURECOREATSULTR11	624	+	GAGAC	(Motif sequence only)
gene-AT4G05100::NC_003075.7:2616372-2618371(+)	TF_motif_seq_0261	SURECOREATSULTR11	630	+	GAGAG	(Motif sequence only)
gene-AT4G05100::NC_003075.7:2616372-2618371(+)	TF_motif_seq_0261	SURECOREATSULTR11	1046	+	GAGAG	(Motif sequence only)
gene-AT4G05100::NC_003075.7:2616372-2618371(+)	TF_motif_seq_0261	SURECOREATSULTR11	1048	+	GAGAG	(Motif sequence only)
gene-AT4G05100::NC_003075.7:2616372-2618371(+)	TF_motif_seq_0261	SURECOREATSULTR11	1073	+	GCGAC	(Motif sequence only)
gene-AT4G05100::NC_003075.7:2616372-2618371(+)	TF_motif_seq_0261	SURECOREATSULTR11	1107	+	GAGAG	(Motif sequence only)
gene-AT4G05100::NC_003075.7:2616372-2618371(+)	TF_motif_seq_0261	SURECOREATSULTR11	1111	+	GCGAC	(Motif sequence only)
gene-AT4G05100::NC_003075.7:2616372-2618371(+)	TF_motif_seq_0261	SURECOREATSULTR11	1113	+	GACAC	(Motif sequence only)
gene-AT4G05100::NC_003075.7:2616372-2618371(+)	TF_motif_seq_0261	SURECOREATSULTR11	1135	-	GTCTC	(Motif sequence only)
gene-AT4G05100::NC_003075.7:2616372-2618371(+)	TF_motif_seq_0261	SURECOREATSULTR11	1192	-	GTCTT	(Motif sequence only)
gene-AT4G05100::NC_003075.7:2616372-2618371(+)	TF_motif_seq_0261	SURECOREATSULTR11	1199	-	GTATC	(Motif sequence only)
gene-AT4G05100::NC_003075.7:2616372-2618371(+)	TF_motif_seq_0261	SURECOREATSULTR11	1268	-	GTTTC	(Motif sequence only)
gene-AT4G05100::NC_003075.7:2616372-2618371(+)	TF_motif_seq_0261	SURECOREATSULTR11	1290	-	GTCTA	(Motif sequence only)
gene-AT4G05100::NC_003075.7:2616372-2618371(+)	TF_motif_seq_0261	SURECOREATSULTR11	1297	-	GTCTT	(Motif sequence only)
gene-AT4G05100::NC_003075.7:2616372-2618371(+)	TF_motif_seq_0261	SURECOREATSULTR11	1345	+	TAGAC	(Motif sequence only)
gene-AT4G05100::NC_003075.7:2616372-2618371(+)	TF_motif_seq_0261	SURECOREATSULTR11	1364	+	GAGAC	(Motif sequence only)
gene-AT4G05100::NC_003075.7:2616372-2618371(+)	TF_motif_seq_0261	SURECOREATSULTR11	1366	-	GACTC	(Motif sequence only)
gene-AT4G05100::NC_003075.7:2616372-2618371(+)	TF_motif_seq_0261	SURECOREATSULTR11	1382	+	GAAAC	(Motif sequence only)
gene-AT4G05100::NC_003075.7:2616372-2618371(+)	TF_motif_seq_0261	SURECOREATSULTR11	1414	+	GAAAC	(Motif sequence only)
gene-AT4G05100::NC_003075.7:2616372-2618371(+)	TF_motif_seq_0261	SURECOREATSULTR11	1428	+	GAAAC	(Motif sequence only)
gene-AT4G05100::NC_003075.7:2616372-2618371(+)	TF_motif_seq_0261	SURECOREATSULTR11	1478	+	GAGAA	(Motif sequence only)
gene-AT4G05100::NC_003075.7:2616372-2618371(+)	TF_motif_seq_0261	SURECOREATSULTR11	1490	-	GTGTC	(Motif sequence only)
gene-AT4G05100::NC_003075.7:2616372-2618371(+)	TF_motif_seq_0261	SURECOREATSULTR11	1531	+	GAGAT	(Motif sequence only)
gene-AT4G05100::NC_003075.7:2616372-2618371(+)	TF_motif_seq_0261	SURECOREATSULTR11	1536	-	GTCTA	(Motif sequence only)
gene-AT4G05100::NC_003075.7:2616372-2618371(+)	TF_motif_seq_0261	SURECOREATSULTR11	1546	+	GTGAC	(Motif sequence only)
gene-AT4G05100::NC_003075.7:2616372-2618371(+)	TF_motif_seq_0261	SURECOREATSULTR11	1577	-	GTTTC	(Motif sequence only)
gene-AT4G05100::NC_003075.7:2616372-2618371(+)	TF_motif_seq_0261	SURECOREATSULTR11	1589	+	GAGAA	(Motif sequence only)
gene-AT4G05100::NC_003075.7:2616372-2618371(+)	TF_motif_seq_0261	SURECOREATSULTR11	1609	-	ATCTC	(Motif sequence only)
gene-AT4G05100::NC_003075.7:2616372-2618371(+)	TF_motif_seq_0261	SURECOREATSULTR11	1662	-	GTTTC	(Motif sequence only)
gene-AT4G05100::NC_003075.7:2616372-2618371(+)	TF_motif_seq_0261	SURECOREATSULTR11	1727	-	GTGTC	(Motif sequence only)
gene-AT4G05100::NC_003075.7:2616372-2618371(+)	TF_motif_seq_0261	SURECOREATSULTR11	1729	-	GTCAC	(Motif sequence only)
gene-AT4G05100::NC_003075.7:2616372-2618371(+)	TF_motif_seq_0261	SURECOREATSULTR11	1958	+	GACAC	(Motif sequence only)
gene-AT4G05100::NC_003075.7:2616372-2618371(+)	TF_motif_seq_0262	IBOXCORE	1	-	ATATC	(Motif sequence only)
gene-AT4G05100::NC_003075.7:2616372-2618371(+)	TF_motif_seq_0262	IBOXCORE	18	+	GATTA	(Motif sequence only)
gene-AT4G05100::NC_003075.7:2616372-2618371(+)	TF_motif_seq_0262	IBOXCORE	20	-	TTATT	(Motif sequence only)
gene-AT4G05100::NC_003075.7:2616372-2618371(+)	TF_motif_seq_0262	IBOXCORE	33	-	TTGTC	(Motif sequence only)
gene-AT4G05100::NC_003075.7:2616372-2618371(+)	TF_motif_seq_0262	IBOXCORE	38	+	TATAA	(Motif sequence only)
gene-AT4G05100::NC_003075.7:2616372-2618371(+)	TF_motif_seq_0262	IBOXCORE	58	-	TTATG	(Motif sequence only)
gene-AT4G05100::NC_003075.7:2616372-2618371(+)	TF_motif_seq_0262	IBOXCORE	68	-	TTATT	(Motif sequence only)
gene-AT4G05100::NC_003075.7:2616372-2618371(+)	TF_motif_seq_0262	IBOXCORE	136	+	TATAA	(Motif sequence only)
gene-AT4G05100::NC_003075.7:2616372-2618371(+)	TF_motif_seq_0262	IBOXCORE	139	+	AATAA	(Motif sequence only)
gene-AT4G05100::NC_003075.7:2616372-2618371(+)	TF_motif_seq_0262	IBOXCORE	157	+	AATAA	(Motif sequence only)
gene-AT4G05100::NC_003075.7:2616372-2618371(+)	TF_motif_seq_0262	IBOXCORE	181	-	TTAAC	(Motif sequence only)
gene-AT4G05100::NC_003075.7:2616372-2618371(+)	TF_motif_seq_0262	IBOXCORE	186	+	TATAA	(Motif sequence only)
gene-AT4G05100::NC_003075.7:2616372-2618371(+)	TF_motif_seq_0262	IBOXCORE	209	-	TTAGC	(Motif sequence only)
gene-AT4G05100::NC_003075.7:2616372-2618371(+)	TF_motif_seq_0262	IBOXCORE	239	+	GATCA	(Motif sequence only)
gene-AT4G05100::NC_003075.7:2616372-2618371(+)	TF_motif_seq_0262	IBOXCORE	260	+	GTTAA	(Motif sequence only)
gene-AT4G05100::NC_003075.7:2616372-2618371(+)	TF_motif_seq_0262	IBOXCORE	263	+	AATAA	(Motif sequence only)
gene-AT4G05100::NC_003075.7:2616372-2618371(+)	TF_motif_seq_0262	IBOXCORE	277	-	TTATT	(Motif sequence only)
gene-AT4G05100::NC_003075.7:2616372-2618371(+)	TF_motif_seq_0262	IBOXCORE	322	+	GATGA	(Motif sequence only)
gene-AT4G05100::NC_003075.7:2616372-2618371(+)	TF_motif_seq_0262	IBOXCORE	347	+	TATAA	(Motif sequence only)
gene-AT4G05100::NC_003075.7:2616372-2618371(+)	TF_motif_seq_0262	IBOXCORE	356	+	GATAA	(Motif sequence only)
gene-AT4G05100::NC_003075.7:2616372-2618371(+)	TF_motif_seq_0262	IBOXCORE	358	-	TAATC	(Motif sequence only)
gene-AT4G05100::NC_003075.7:2616372-2618371(+)	TF_motif_seq_0262	IBOXCORE	362	-	CTATC	(Motif sequence only)
gene-AT4G05100::NC_003075.7:2616372-2618371(+)	TF_motif_seq_0262	IBOXCORE	388	-	GTATC	(Motif sequence only)
gene-AT4G05100::NC_003075.7:2616372-2618371(+)	TF_motif_seq_0262	IBOXCORE	399	-	TTTTC	(Motif sequence only)
gene-AT4G05100::NC_003075.7:2616372-2618371(+)	TF_motif_seq_0262	IBOXCORE	404	-	TTCTC	(Motif sequence only)
gene-AT4G05100::NC_003075.7:2616372-2618371(+)	TF_motif_seq_0262	IBOXCORE	413	-	TTATA	(Motif sequence only)
gene-AT4G05100::NC_003075.7:2616372-2618371(+)	TF_motif_seq_0262	IBOXCORE	431	+	GATTA	(Motif sequence only)
gene-AT4G05100::NC_003075.7:2616372-2618371(+)	TF_motif_seq_0262	IBOXCORE	433	-	TTATA	(Motif sequence only)
gene-AT4G05100::NC_003075.7:2616372-2618371(+)	TF_motif_seq_0262	IBOXCORE	434	+	TATAA	(Motif sequence only)
gene-AT4G05100::NC_003075.7:2616372-2618371(+)	TF_motif_seq_0262	IBOXCORE	451	+	AATAA	(Motif sequence only)
gene-AT4G05100::NC_003075.7:2616372-2618371(+)	TF_motif_seq_0262	IBOXCORE	454	+	AATAA	(Motif sequence only)
gene-AT4G05100::NC_003075.7:2616372-2618371(+)	TF_motif_seq_0262	IBOXCORE	459	+	GATAT	(Motif sequence only)
gene-AT4G05100::NC_003075.7:2616372-2618371(+)	TF_motif_seq_0262	IBOXCORE	477	+	TATAA	(Motif sequence only)
gene-AT4G05100::NC_003075.7:2616372-2618371(+)	TF_motif_seq_0262	IBOXCORE	555	+	GAAAA	(Motif sequence only)
gene-AT4G05100::NC_003075.7:2616372-2618371(+)	TF_motif_seq_0262	IBOXCORE	561	+	GCTAA	(Motif sequence only)
gene-AT4G05100::NC_003075.7:2616372-2618371(+)	TF_motif_seq_0262	IBOXCORE	564	+	AATAA	(Motif sequence only)
gene-AT4G05100::NC_003075.7:2616372-2618371(+)	TF_motif_seq_0262	IBOXCORE	592	-	TTTTC	(Motif sequence only)
gene-AT4G05100::NC_003075.7:2616372-2618371(+)	TF_motif_seq_0262	IBOXCORE	599	+	GAGAA	(Motif sequence only)
gene-AT4G05100::NC_003075.7:2616372-2618371(+)	TF_motif_seq_0262	IBOXCORE	614	+	GATAG	(Motif sequence only)
gene-AT4G05100::NC_003075.7:2616372-2618371(+)	TF_motif_seq_0262	IBOXCORE	640	+	GCTAA	(Motif sequence only)
gene-AT4G05100::NC_003075.7:2616372-2618371(+)	TF_motif_seq_0262	IBOXCORE	677	-	TTATT	(Motif sequence only)
gene-AT4G05100::NC_003075.7:2616372-2618371(+)	TF_motif_seq_0262	IBOXCORE	681	-	TTATC	(Motif sequence only)
gene-AT4G05100::NC_003075.7:2616372-2618371(+)	TF_motif_seq_0262	IBOXCORE	688	-	TTTTC	(Motif sequence only)
gene-AT4G05100::NC_003075.7:2616372-2618371(+)	TF_motif_seq_0262	IBOXCORE	693	-	TTATA	(Motif sequence only)
gene-AT4G05100::NC_003075.7:2616372-2618371(+)	TF_motif_seq_0262	IBOXCORE	714	-	TTATA	(Motif sequence only)
gene-AT4G05100::NC_003075.7:2616372-2618371(+)	TF_motif_seq_0262	IBOXCORE	723	+	GGTAA	(Motif sequence only)
gene-AT4G05100::NC_003075.7:2616372-2618371(+)	TF_motif_seq_0262	IBOXCORE	736	-	TTATA	(Motif sequence only)
gene-AT4G05100::NC_003075.7:2616372-2618371(+)	TF_motif_seq_0262	IBOXCORE	737	+	TATAA	(Motif sequence only)
gene-AT4G05100::NC_003075.7:2616372-2618371(+)	TF_motif_seq_0262	IBOXCORE	746	+	AATAA	(Motif sequence only)
gene-AT4G05100::NC_003075.7:2616372-2618371(+)	TF_motif_seq_0262	IBOXCORE	769	-	TTATT	(Motif sequence only)
gene-AT4G05100::NC_003075.7:2616372-2618371(+)	TF_motif_seq_0262	IBOXCORE	779	-	TTACC	(Motif sequence only)
gene-AT4G05100::NC_003075.7:2616372-2618371(+)	TF_motif_seq_0262	IBOXCORE	796	-	TTATA	(Motif sequence only)
gene-AT4G05100::NC_003075.7:2616372-2618371(+)	TF_motif_seq_0262	IBOXCORE	802	+	GAAAA	(Motif sequence only)
gene-AT4G05100::NC_003075.7:2616372-2618371(+)	TF_motif_seq_0262	IBOXCORE	811	-	TTATT	(Motif sequence only)
gene-AT4G05100::NC_003075.7:2616372-2618371(+)	TF_motif_seq_0262	IBOXCORE	815	-	TTATT	(Motif sequence only)
gene-AT4G05100::NC_003075.7:2616372-2618371(+)	TF_motif_seq_0262	IBOXCORE	828	+	GATAT	(Motif sequence only)
gene-AT4G05100::NC_003075.7:2616372-2618371(+)	TF_motif_seq_0262	IBOXCORE	835	+	GATGA	(Motif sequence only)
gene-AT4G05100::NC_003075.7:2616372-2618371(+)	TF_motif_seq_0262	IBOXCORE	852	-	TTATA	(Motif sequence only)
gene-AT4G05100::NC_003075.7:2616372-2618371(+)	TF_motif_seq_0262	IBOXCORE	853	+	TATAA	(Motif sequence only)
gene-AT4G05100::NC_003075.7:2616372-2618371(+)	TF_motif_seq_0262	IBOXCORE	880	+	GTTAA	(Motif sequence only)
gene-AT4G05100::NC_003075.7:2616372-2618371(+)	TF_motif_seq_0262	IBOXCORE	888	+	GTTAA	(Motif sequence only)
gene-AT4G05100::NC_003075.7:2616372-2618371(+)	TF_motif_seq_0262	IBOXCORE	897	-	TTTTC	(Motif sequence only)
gene-AT4G05100::NC_003075.7:2616372-2618371(+)	TF_motif_seq_0262	IBOXCORE	930	-	TTATG	(Motif sequence only)
gene-AT4G05100::NC_003075.7:2616372-2618371(+)	TF_motif_seq_0262	IBOXCORE	935	-	TTACC	(Motif sequence only)
gene-AT4G05100::NC_003075.7:2616372-2618371(+)	TF_motif_seq_0262	IBOXCORE	952	+	GATAG	(Motif sequence only)
gene-AT4G05100::NC_003075.7:2616372-2618371(+)	TF_motif_seq_0262	IBOXCORE	968	-	TTATC	(Motif sequence only)
gene-AT4G05100::NC_003075.7:2616372-2618371(+)	TF_motif_seq_0262	IBOXCORE	1010	+	GAAAA	(Motif sequence only)
gene-AT4G05100::NC_003075.7:2616372-2618371(+)	TF_motif_seq_0262	IBOXCORE	1063	+	CATAA	(Motif sequence only)
gene-AT4G05100::NC_003075.7:2616372-2618371(+)	TF_motif_seq_0262	IBOXCORE	1079	+	GCTAA	(Motif sequence only)
gene-AT4G05100::NC_003075.7:2616372-2618371(+)	TF_motif_seq_0262	IBOXCORE	1087	+	GAAAA	(Motif sequence only)
gene-AT4G05100::NC_003075.7:2616372-2618371(+)	TF_motif_seq_0262	IBOXCORE	1159	+	GTTAA	(Motif sequence only)
gene-AT4G05100::NC_003075.7:2616372-2618371(+)	TF_motif_seq_0262	IBOXCORE	1164	-	TTATC	(Motif sequence only)
gene-AT4G05100::NC_003075.7:2616372-2618371(+)	TF_motif_seq_0262	IBOXCORE	1173	-	TTATC	(Motif sequence only)
gene-AT4G05100::NC_003075.7:2616372-2618371(+)	TF_motif_seq_0262	IBOXCORE	1182	+	GATTA	(Motif sequence only)
gene-AT4G05100::NC_003075.7:2616372-2618371(+)	TF_motif_seq_0262	IBOXCORE	1187	+	GTTAA	(Motif sequence only)
gene-AT4G05100::NC_003075.7:2616372-2618371(+)	TF_motif_seq_0262	IBOXCORE	1199	-	GTATC	(Motif sequence only)
gene-AT4G05100::NC_003075.7:2616372-2618371(+)	TF_motif_seq_0262	IBOXCORE	1202	-	TCATC	(Motif sequence only)
gene-AT4G05100::NC_003075.7:2616372-2618371(+)	TF_motif_seq_0262	IBOXCORE	1215	-	TTATA	(Motif sequence only)
gene-AT4G05100::NC_003075.7:2616372-2618371(+)	TF_motif_seq_0262	IBOXCORE	1223	-	TAATC	(Motif sequence only)
gene-AT4G05100::NC_003075.7:2616372-2618371(+)	TF_motif_seq_0262	IBOXCORE	1238	-	TTAAC	(Motif sequence only)
gene-AT4G05100::NC_003075.7:2616372-2618371(+)	TF_motif_seq_0262	IBOXCORE	1273	-	ATATC	(Motif sequence only)
gene-AT4G05100::NC_003075.7:2616372-2618371(+)	TF_motif_seq_0262	IBOXCORE	1288	-	TTGTC	(Motif sequence only)
gene-AT4G05100::NC_003075.7:2616372-2618371(+)	TF_motif_seq_0262	IBOXCORE	1301	-	TTATT	(Motif sequence only)
gene-AT4G05100::NC_003075.7:2616372-2618371(+)	TF_motif_seq_0262	IBOXCORE	1304	-	TTAAC	(Motif sequence only)
gene-AT4G05100::NC_003075.7:2616372-2618371(+)	TF_motif_seq_0262	IBOXCORE	1325	-	TTATC	(Motif sequence only)
gene-AT4G05100::NC_003075.7:2616372-2618371(+)	TF_motif_seq_0262	IBOXCORE	1332	-	TTTTC	(Motif sequence only)
gene-AT4G05100::NC_003075.7:2616372-2618371(+)	TF_motif_seq_0262	IBOXCORE	1359	-	TTATA	(Motif sequence only)
gene-AT4G05100::NC_003075.7:2616372-2618371(+)	TF_motif_seq_0262	IBOXCORE	1371	-	TTATA	(Motif sequence only)
gene-AT4G05100::NC_003075.7:2616372-2618371(+)	TF_motif_seq_0262	IBOXCORE	1372	+	TATAA	(Motif sequence only)
gene-AT4G05100::NC_003075.7:2616372-2618371(+)	TF_motif_seq_0262	IBOXCORE	1378	-	TTATG	(Motif sequence only)
gene-AT4G05100::NC_003075.7:2616372-2618371(+)	TF_motif_seq_0262	IBOXCORE	1390	-	TAATC	(Motif sequence only)
gene-AT4G05100::NC_003075.7:2616372-2618371(+)	TF_motif_seq_0262	IBOXCORE	1406	+	GTTAA	(Motif sequence only)
gene-AT4G05100::NC_003075.7:2616372-2618371(+)	TF_motif_seq_0262	IBOXCORE	1419	-	ATATC	(Motif sequence only)
gene-AT4G05100::NC_003075.7:2616372-2618371(+)	TF_motif_seq_0262	IBOXCORE	1454	+	GATAT	(Motif sequence only)
gene-AT4G05100::NC_003075.7:2616372-2618371(+)	TF_motif_seq_0262	IBOXCORE	1459	-	TTTTC	(Motif sequence only)
gene-AT4G05100::NC_003075.7:2616372-2618371(+)	TF_motif_seq_0262	IBOXCORE	1464	-	TTATT	(Motif sequence only)
gene-AT4G05100::NC_003075.7:2616372-2618371(+)	TF_motif_seq_0262	IBOXCORE	1470	-	ATATC	(Motif sequence only)
gene-AT4G05100::NC_003075.7:2616372-2618371(+)	TF_motif_seq_0262	IBOXCORE	1478	+	GAGAA	(Motif sequence only)
gene-AT4G05100::NC_003075.7:2616372-2618371(+)	TF_motif_seq_0262	IBOXCORE	1496	-	TTAGC	(Motif sequence only)
gene-AT4G05100::NC_003075.7:2616372-2618371(+)	TF_motif_seq_0262	IBOXCORE	1507	+	GGTAA	(Motif sequence only)
gene-AT4G05100::NC_003075.7:2616372-2618371(+)	TF_motif_seq_0262	IBOXCORE	1589	+	GAGAA	(Motif sequence only)
gene-AT4G05100::NC_003075.7:2616372-2618371(+)	TF_motif_seq_0262	IBOXCORE	1616	+	GATAT	(Motif sequence only)
gene-AT4G05100::NC_003075.7:2616372-2618371(+)	TF_motif_seq_0262	IBOXCORE	1654	+	TATAA	(Motif sequence only)
gene-AT4G05100::NC_003075.7:2616372-2618371(+)	TF_motif_seq_0262	IBOXCORE	1671	-	CTATC	(Motif sequence only)
gene-AT4G05100::NC_003075.7:2616372-2618371(+)	TF_motif_seq_0262	IBOXCORE	1680	-	TTATG	(Motif sequence only)
gene-AT4G05100::NC_003075.7:2616372-2618371(+)	TF_motif_seq_0262	IBOXCORE	1684	+	GAAAA	(Motif sequence only)
gene-AT4G05100::NC_003075.7:2616372-2618371(+)	TF_motif_seq_0262	IBOXCORE	1699	-	TTACC	(Motif sequence only)
gene-AT4G05100::NC_003075.7:2616372-2618371(+)	TF_motif_seq_0262	IBOXCORE	1757	-	TTATA	(Motif sequence only)
gene-AT4G05100::NC_003075.7:2616372-2618371(+)	TF_motif_seq_0262	IBOXCORE	1758	+	TATAA	(Motif sequence only)
gene-AT4G05100::NC_003075.7:2616372-2618371(+)	TF_motif_seq_0262	IBOXCORE	1763	-	TTAAC	(Motif sequence only)
gene-AT4G05100::NC_003075.7:2616372-2618371(+)	TF_motif_seq_0262	IBOXCORE	1774	+	CATAA	(Motif sequence only)
gene-AT4G05100::NC_003075.7:2616372-2618371(+)	TF_motif_seq_0262	IBOXCORE	1819	-	TTATT	(Motif sequence only)
gene-AT4G05100::NC_003075.7:2616372-2618371(+)	TF_motif_seq_0262	IBOXCORE	1850	-	TTAGC	(Motif sequence only)
gene-AT4G05100::NC_003075.7:2616372-2618371(+)	TF_motif_seq_0262	IBOXCORE	1857	-	TTATC	(Motif sequence only)
gene-AT4G05100::NC_003075.7:2616372-2618371(+)	TF_motif_seq_0262	IBOXCORE	1861	+	CATAA	(Motif sequence only)
gene-AT4G05100::NC_003075.7:2616372-2618371(+)	TF_motif_seq_0262	IBOXCORE	1871	+	AATAA	(Motif sequence only)
gene-AT4G05100::NC_003075.7:2616372-2618371(+)	TF_motif_seq_0262	IBOXCORE	1883	+	GAAAA	(Motif sequence only)
gene-AT4G05100::NC_003075.7:2616372-2618371(+)	TF_motif_seq_0262	IBOXCORE	1931	+	GAAAA	(Motif sequence only)
gene-AT4G05100::NC_003075.7:2616372-2618371(+)	TF_motif_seq_0262	IBOXCORE	1948	+	GATTA	(Motif sequence only)
gene-AT4G05100::NC_003075.7:2616372-2618371(+)	TF_motif_seq_0262	IBOXCORE	1950	-	TTATA	(Motif sequence only)
gene-AT4G05100::NC_003075.7:2616372-2618371(+)	TF_motif_seq_0262	IBOXCORE	1951	+	TATAA	(Motif sequence only)
gene-AT4G05100::NC_003075.7:2616372-2618371(+)	TF_motif_seq_0262	IBOXCORE	1974	+	GATGA	(Motif sequence only)
gene-AT4G05100::NC_003075.7:2616372-2618371(+)	TF_motif_seq_0263	SORLIP1AT	145	+	GCCAT	(Motif sequence only)
gene-AT4G05100::NC_003075.7:2616372-2618371(+)	TF_motif_seq_0263	SORLIP1AT	154	+	GCCAA	(Motif sequence only)
gene-AT4G05100::NC_003075.7:2616372-2618371(+)	TF_motif_seq_0263	SORLIP1AT	212	+	GCTAC	(Motif sequence only)
gene-AT4G05100::NC_003075.7:2616372-2618371(+)	TF_motif_seq_0263	SORLIP1AT	301	-	GTGTC	(Motif sequence only)
gene-AT4G05100::NC_003075.7:2616372-2618371(+)	TF_motif_seq_0263	SORLIP1AT	327	-	GTTGC	(Motif sequence only)
gene-AT4G05100::NC_003075.7:2616372-2618371(+)	TF_motif_seq_0263	SORLIP1AT	339	-	GTGGT	(Motif sequence only)
gene-AT4G05100::NC_003075.7:2616372-2618371(+)	TF_motif_seq_0263	SORLIP1AT	371	+	GTCAC	(Motif sequence only)
gene-AT4G05100::NC_003075.7:2616372-2618371(+)	TF_motif_seq_0263	SORLIP1AT	376	+	GCCAT	(Motif sequence only)
gene-AT4G05100::NC_003075.7:2616372-2618371(+)	TF_motif_seq_0263	SORLIP1AT	440	+	GCCAC	(Motif sequence only)
gene-AT4G05100::NC_003075.7:2616372-2618371(+)	TF_motif_seq_0263	SORLIP1AT	1056	-	GTGGC	(Motif sequence only)
gene-AT4G05100::NC_003075.7:2616372-2618371(+)	TF_motif_seq_0263	SORLIP1AT	1070	-	TTGGC	(Motif sequence only)
gene-AT4G05100::NC_003075.7:2616372-2618371(+)	TF_motif_seq_0263	SORLIP1AT	1073	+	GCGAC	(Motif sequence only)
gene-AT4G05100::NC_003075.7:2616372-2618371(+)	TF_motif_seq_0263	SORLIP1AT	1094	+	GCCAA	(Motif sequence only)
gene-AT4G05100::NC_003075.7:2616372-2618371(+)	TF_motif_seq_0263	SORLIP1AT	1101	+	GCTAC	(Motif sequence only)
gene-AT4G05100::NC_003075.7:2616372-2618371(+)	TF_motif_seq_0263	SORLIP1AT	1111	+	GCGAC	(Motif sequence only)
gene-AT4G05100::NC_003075.7:2616372-2618371(+)	TF_motif_seq_0263	SORLIP1AT	1113	+	GACAC	(Motif sequence only)
gene-AT4G05100::NC_003075.7:2616372-2618371(+)	TF_motif_seq_0263	SORLIP1AT	1490	-	GTGTC	(Motif sequence only)
gene-AT4G05100::NC_003075.7:2616372-2618371(+)	TF_motif_seq_0263	SORLIP1AT	1546	-	GTGAC	(Motif sequence only)
gene-AT4G05100::NC_003075.7:2616372-2618371(+)	TF_motif_seq_0263	SORLIP1AT	1727	-	GTGTC	(Motif sequence only)
gene-AT4G05100::NC_003075.7:2616372-2618371(+)	TF_motif_seq_0263	SORLIP1AT	1729	+	GTCAC	(Motif sequence only)
gene-AT4G05100::NC_003075.7:2616372-2618371(+)	TF_motif_seq_0263	SORLIP1AT	1826	-	GTGGC	(Motif sequence only)
gene-AT4G05100::NC_003075.7:2616372-2618371(+)	TF_motif_seq_0263	SORLIP1AT	1829	+	GCCAG	(Motif sequence only)
gene-AT4G05100::NC_003075.7:2616372-2618371(+)	TF_motif_seq_0263	SORLIP1AT	1853	+	GCCAT	(Motif sequence only)
gene-AT4G05100::NC_003075.7:2616372-2618371(+)	TF_motif_seq_0263	SORLIP1AT	1958	+	GACAC	(Motif sequence only)
gene-AT4G05100::NC_003075.7:2616372-2618371(+)	TF_motif_seq_0263	SORLIP1AT	1963	-	GTAGC	(Motif sequence only)
gene-AT4G05100::NC_003075.7:2616372-2618371(+)	TF_motif_seq_0263	SORLIP1AT	1988	+	GGCAC	(Motif sequence only)
gene-AT4G05100::NC_003075.7:2616372-2618371(+)	TF_motif_seq_0264	MYBST1	2	-	TATCG	(Motif sequence only)
gene-AT4G05100::NC_003075.7:2616372-2618371(+)	TF_motif_seq_0264	MYBST1	77	+	GGATG	(Motif sequence only)
gene-AT4G05100::NC_003075.7:2616372-2618371(+)	TF_motif_seq_0264	MYBST1	95	+	GAATA	(Motif sequence only)
gene-AT4G05100::NC_003075.7:2616372-2618371(+)	TF_motif_seq_0264	MYBST1	98	-	TATTC	(Motif sequence only)
gene-AT4G05100::NC_003075.7:2616372-2618371(+)	TF_motif_seq_0264	MYBST1	128	-	TATGC	(Motif sequence only)
gene-AT4G05100::NC_003075.7:2616372-2618371(+)	TF_motif_seq_0264	MYBST1	131	+	GCATA	(Motif sequence only)
gene-AT4G05100::NC_003075.7:2616372-2618371(+)	TF_motif_seq_0264	MYBST1	149	-	TATGC	(Motif sequence only)
gene-AT4G05100::NC_003075.7:2616372-2618371(+)	TF_motif_seq_0264	MYBST1	167	-	AATCC	(Motif sequence only)
gene-AT4G05100::NC_003075.7:2616372-2618371(+)	TF_motif_seq_0264	MYBST1	175	-	TATTC	(Motif sequence only)
gene-AT4G05100::NC_003075.7:2616372-2618371(+)	TF_motif_seq_0264	MYBST1	222	-	TATTC	(Motif sequence only)
gene-AT4G05100::NC_003075.7:2616372-2618371(+)	TF_motif_seq_0264	MYBST1	236	+	GGAGA	(Motif sequence only)
gene-AT4G05100::NC_003075.7:2616372-2618371(+)	TF_motif_seq_0264	MYBST1	268	-	AATCC	(Motif sequence only)
gene-AT4G05100::NC_003075.7:2616372-2618371(+)	TF_motif_seq_0264	MYBST1	355	+	TGATA	(Motif sequence only)
gene-AT4G05100::NC_003075.7:2616372-2618371(+)	TF_motif_seq_0264	MYBST1	363	-	TATCT	(Motif sequence only)
gene-AT4G05100::NC_003075.7:2616372-2618371(+)	TF_motif_seq_0264	MYBST1	389	-	TATCA	(Motif sequence only)
gene-AT4G05100::NC_003075.7:2616372-2618371(+)	TF_motif_seq_0264	MYBST1	450	+	GAATA	(Motif sequence only)
gene-AT4G05100::NC_003075.7:2616372-2618371(+)	TF_motif_seq_0264	MYBST1	458	+	AGATA	(Motif sequence only)
gene-AT4G05100::NC_003075.7:2616372-2618371(+)	TF_motif_seq_0264	MYBST1	537	-	TATTC	(Motif sequence only)
gene-AT4G05100::NC_003075.7:2616372-2618371(+)	TF_motif_seq_0264	MYBST1	613	+	GGATA	(Motif sequence only)
gene-AT4G05100::NC_003075.7:2616372-2618371(+)	TF_motif_seq_0264	MYBST1	682	-	TATCT	(Motif sequence only)
gene-AT4G05100::NC_003075.7:2616372-2618371(+)	TF_motif_seq_0264	MYBST1	694	-	TATAC	(Motif sequence only)
gene-AT4G05100::NC_003075.7:2616372-2618371(+)	TF_motif_seq_0264	MYBST1	780	-	TACCC	(Motif sequence only)
gene-AT4G05100::NC_003075.7:2616372-2618371(+)	TF_motif_seq_0264	MYBST1	797	-	TATAC	(Motif sequence only)
gene-AT4G05100::NC_003075.7:2616372-2618371(+)	TF_motif_seq_0264	MYBST1	827	+	TGATA	(Motif sequence only)
gene-AT4G05100::NC_003075.7:2616372-2618371(+)	TF_motif_seq_0264	MYBST1	839	-	AATCC	(Motif sequence only)
gene-AT4G05100::NC_003075.7:2616372-2618371(+)	TF_motif_seq_0264	MYBST1	946	-	TATTC	(Motif sequence only)
gene-AT4G05100::NC_003075.7:2616372-2618371(+)	TF_motif_seq_0264	MYBST1	951	+	TGATA	(Motif sequence only)
gene-AT4G05100::NC_003075.7:2616372-2618371(+)	TF_motif_seq_0264	MYBST1	969	-	TATCC	(Motif sequence only)
gene-AT4G05100::NC_003075.7:2616372-2618371(+)	TF_motif_seq_0264	MYBST1	977	+	GTATA	(Motif sequence only)
gene-AT4G05100::NC_003075.7:2616372-2618371(+)	TF_motif_seq_0264	MYBST1	1009	+	GGAAA	(Motif sequence only)
gene-AT4G05100::NC_003075.7:2616372-2618371(+)	TF_motif_seq_0264	MYBST1	1041	+	GGAAA	(Motif sequence only)
gene-AT4G05100::NC_003075.7:2616372-2618371(+)	TF_motif_seq_0264	MYBST1	1106	+	GGAGA	(Motif sequence only)
gene-AT4G05100::NC_003075.7:2616372-2618371(+)	TF_motif_seq_0264	MYBST1	1165	-	TATCA	(Motif sequence only)
gene-AT4G05100::NC_003075.7:2616372-2618371(+)	TF_motif_seq_0264	MYBST1	1174	-	TATCA	(Motif sequence only)
gene-AT4G05100::NC_003075.7:2616372-2618371(+)	TF_motif_seq_0264	MYBST1	1200	-	TATCA	(Motif sequence only)
gene-AT4G05100::NC_003075.7:2616372-2618371(+)	TF_motif_seq_0264	MYBST1	1216	-	TATAC	(Motif sequence only)
gene-AT4G05100::NC_003075.7:2616372-2618371(+)	TF_motif_seq_0264	MYBST1	1228	-	TATAC	(Motif sequence only)
gene-AT4G05100::NC_003075.7:2616372-2618371(+)	TF_motif_seq_0264	MYBST1	1274	-	TATCA	(Motif sequence only)
gene-AT4G05100::NC_003075.7:2616372-2618371(+)	TF_motif_seq_0264	MYBST1	1326	-	TATCA	(Motif sequence only)
gene-AT4G05100::NC_003075.7:2616372-2618371(+)	TF_motif_seq_0264	MYBST1	1342	+	GAATA	(Motif sequence only)
gene-AT4G05100::NC_003075.7:2616372-2618371(+)	TF_motif_seq_0264	MYBST1	1352	-	TATAC	(Motif sequence only)
gene-AT4G05100::NC_003075.7:2616372-2618371(+)	TF_motif_seq_0264	MYBST1	1420	-	TATCA	(Motif sequence only)
gene-AT4G05100::NC_003075.7:2616372-2618371(+)	TF_motif_seq_0264	MYBST1	1435	+	GGGTA	(Motif sequence only)
gene-AT4G05100::NC_003075.7:2616372-2618371(+)	TF_motif_seq_0264	MYBST1	1446	+	GGATT	(Motif sequence only)
gene-AT4G05100::NC_003075.7:2616372-2618371(+)	TF_motif_seq_0264	MYBST1	1453	+	CGATA	(Motif sequence only)
gene-AT4G05100::NC_003075.7:2616372-2618371(+)	TF_motif_seq_0264	MYBST1	1471	-	TATCA	(Motif sequence only)
gene-AT4G05100::NC_003075.7:2616372-2618371(+)	TF_motif_seq_0264	MYBST1	1601	-	GATCC	(Motif sequence only)
gene-AT4G05100::NC_003075.7:2616372-2618371(+)	TF_motif_seq_0264	MYBST1	1615	+	TGATA	(Motif sequence only)
gene-AT4G05100::NC_003075.7:2616372-2618371(+)	TF_motif_seq_0264	MYBST1	1618	-	TATTC	(Motif sequence only)
gene-AT4G05100::NC_003075.7:2616372-2618371(+)	TF_motif_seq_0264	MYBST1	1653	+	GTATA	(Motif sequence only)
gene-AT4G05100::NC_003075.7:2616372-2618371(+)	TF_motif_seq_0264	MYBST1	1667	-	TATAC	(Motif sequence only)
gene-AT4G05100::NC_003075.7:2616372-2618371(+)	TF_motif_seq_0264	MYBST1	1672	-	TATCT	(Motif sequence only)
gene-AT4G05100::NC_003075.7:2616372-2618371(+)	TF_motif_seq_0264	MYBST1	1697	+	GGTTA	(Motif sequence only)
gene-AT4G05100::NC_003075.7:2616372-2618371(+)	TF_motif_seq_0264	MYBST1	1700	-	TACCC	(Motif sequence only)
gene-AT4G05100::NC_003075.7:2616372-2618371(+)	TF_motif_seq_0264	MYBST1	1751	+	GCATA	(Motif sequence only)
gene-AT4G05100::NC_003075.7:2616372-2618371(+)	TF_motif_seq_0264	MYBST1	1851	-	TAGCC	(Motif sequence only)
gene-AT4G05100::NC_003075.7:2616372-2618371(+)	TF_motif_seq_0264	MYBST1	1858	-	TATCA	(Motif sequence only)
gene-AT4G05100::NC_003075.7:2616372-2618371(+)	TF_motif_seq_0264	MYBST1	1882	+	GGAAA	(Motif sequence only)
gene-AT4G05100::NC_003075.7:2616372-2618371(+)	TF_motif_seq_0264	MYBST1	1906	+	GTATA	(Motif sequence only)
gene-AT4G05100::NC_003075.7:2616372-2618371(+)	TF_motif_seq_0264	MYBST1	1907	-	TATAC	(Motif sequence only)
gene-AT4G05100::NC_003075.7:2616372-2618371(+)	TF_motif_seq_0264	MYBST1	1911	-	CATCC	(Motif sequence only)
gene-AT4G05100::NC_003075.7:2616372-2618371(+)	TF_motif_seq_0264	MYBST1	1930	+	GGAAA	(Motif sequence only)
gene-AT4G05100::NC_003075.7:2616372-2618371(+)	TF_motif_seq_0264	MYBST1	1947	+	GGATT	(Motif sequence only)
gene-AT4G05100::NC_003075.7:2616372-2618371(+)	TF_motif_seq_0264	MYBST1	1957	+	GGACA	(Motif sequence only)
gene-AT4G05100::NC_003075.7:2616372-2618371(+)	TF_motif_seq_0264	MYBST1	1964	-	TAGCC	(Motif sequence only)
gene-AT4G05100::NC_003075.7:2616372-2618371(+)	TF_motif_seq_0265	SORLIP2AT	143	+	AGGCC	(Motif sequence only)
gene-AT4G05100::NC_003075.7:2616372-2618371(+)	TF_motif_seq_0265	SORLIP2AT	144	-	GGCCA	(Motif sequence only)
gene-AT4G05100::NC_003075.7:2616372-2618371(+)	TF_motif_seq_0265	SORLIP2AT	152	+	GCGCC	(Motif sequence only)
gene-AT4G05100::NC_003075.7:2616372-2618371(+)	TF_motif_seq_0265	SORLIP2AT	1582	+	AGGCC	(Motif sequence only)
gene-AT4G05100::NC_003075.7:2616372-2618371(+)	TF_motif_seq_0265	SORLIP2AT	1583	-	GGCCT	(Motif sequence only)
gene-AT4G05100::NC_003075.7:2616372-2618371(+)	TF_motif_seq_0265	SORLIP2AT	1827	+	TGGCC	(Motif sequence only)
gene-AT4G05100::NC_003075.7:2616372-2618371(+)	TF_motif_seq_0265	SORLIP2AT	1828	-	GGCCA	(Motif sequence only)
gene-AT4G05100::NC_003075.7:2616372-2618371(+)	TF_motif_seq_0265	SORLIP2AT	1965	-	AGCCC	(Motif sequence only)
gene-AT4G05100::NC_003075.7:2616372-2618371(+)	TF_motif_seq_0265	SORLIP2AT	1988	-	GGCAC	(Motif sequence only)
gene-AT4G05100::NC_003075.7:2616372-2618371(+)	TF_motif_seq_0268	ARR1AT	17	+	TGATT	(Motif sequence only)
gene-AT4G05100::NC_003075.7:2616372-2618371(+)	TF_motif_seq_0268	ARR1AT	28	+	AGATT	(Motif sequence only)
gene-AT4G05100::NC_003075.7:2616372-2618371(+)	TF_motif_seq_0268	ARR1AT	167	-	AATCC	(Motif sequence only)
gene-AT4G05100::NC_003075.7:2616372-2618371(+)	TF_motif_seq_0268	ARR1AT	268	-	AATCC	(Motif sequence only)
gene-AT4G05100::NC_003075.7:2616372-2618371(+)	TF_motif_seq_0268	ARR1AT	359	-	AATCT	(Motif sequence only)
gene-AT4G05100::NC_003075.7:2616372-2618371(+)	TF_motif_seq_0268	ARR1AT	393	-	AATCA	(Motif sequence only)
gene-AT4G05100::NC_003075.7:2616372-2618371(+)	TF_motif_seq_0268	ARR1AT	430	+	TGATT	(Motif sequence only)
gene-AT4G05100::NC_003075.7:2616372-2618371(+)	TF_motif_seq_0268	ARR1AT	487	-	AATCA	(Motif sequence only)
gene-AT4G05100::NC_003075.7:2616372-2618371(+)	TF_motif_seq_0268	ARR1AT	530	-	AATCA	(Motif sequence only)
gene-AT4G05100::NC_003075.7:2616372-2618371(+)	TF_motif_seq_0268	ARR1AT	544	-	AATCT	(Motif sequence only)
gene-AT4G05100::NC_003075.7:2616372-2618371(+)	TF_motif_seq_0268	ARR1AT	576	+	AGATT	(Motif sequence only)
gene-AT4G05100::NC_003075.7:2616372-2618371(+)	TF_motif_seq_0268	ARR1AT	839	-	AATCC	(Motif sequence only)
gene-AT4G05100::NC_003075.7:2616372-2618371(+)	TF_motif_seq_0268	ARR1AT	846	-	AATCT	(Motif sequence only)
gene-AT4G05100::NC_003075.7:2616372-2618371(+)	TF_motif_seq_0268	ARR1AT	909	-	AATCA	(Motif sequence only)
[truncated: 50,270 more rows]
